# Supplementary material
Source: MDPI journal article supplement (https://www.mdpi.com/1999-4907/8/8/293)
Supplement: s1 [file s1]

Archive with 14 entries (14 files):
- ALGORITHM S1.txt
- ALGORITHM S2.txt
- DATASET S1.csv
- DATASET S2.csv
- DATASET S3.csv
- DATASET S4.csv
- DATASET S5.csv
- FIGURE S1.pdf
- FIGURE S2.pdf
- NOTE S1.docx
- NOTE S2.docx
- NOTE S3.docx
- NOTE S4.docx
- TABLE S1.docx
