# Supplementary material
Source: MDPI journal article supplement (https://www.mdpi.com/1999-4907/8/8/293)
Supplement: s1 [file s1 › ALGORITHM S1.txt]

LAMBDA<-function(x,y,theta)			# imput required: trees coordinates (vectors; x, y) and theta value (numeric; theta) (see main text about  how to calculate theta)
{
plot(x,y,xlim=c(min(x)-(3*theta),max(x)+(3*theta)),ylim=c(min(y)-(3*theta),max(y)+(3*theta)),pch=16,cex=0.2)		
range_x<-max(x)-min(x)																	
range_y<-max(y)-min(y)						
ncx<-2+ceiling(range_x/theta) 					
ncx
ncy<-2+ceiling(range_y/theta)					
ncy							
xs<-min(x)-(theta)+(runif(1)*theta)											 		
ys<-min(y)-(theta)+(runif(1)*theta)				
x_vert<-seq(0,ncx*theta,theta)+xs													
y_down_vert<-rep(0,ncx)+ys
y_up_vert<-rep(ncy*theta,ncy)+ys
segments(x_vert,y_down_vert,x_vert,y_up_vert,col="green")							
x_left_horiz<-rep(0,ncy)+xs
x_right_horiz<-rep(ncx*theta,ncx)+xs
y_horiz<-seq(0,ncy*theta,theta)+ys
segments(x_left_horiz,y_horiz,x_right_horiz,y_horiz,col="green")
gridx<-ceiling((x-xs)/theta)													
gridy<-ceiling((y-ys)/theta)		
cod1<-paste0(gridx,"_",gridy)													
cod2<-unique(paste0(gridx,"_",gridy))										
mergecode<-(rep(NA,length(cod1)))	
ind1<-numeric()				
for (i in 1:length(cod2))		
{
ind1<-which(cod1==cod2[i])
if (length(ind1)<2) mergecode[ind1]<-NA else mergecode[ind1]<-i
}
return(mergecode)						# output provided: codes to be sent to the PHI function as input "gamma" (vector)
}
