# Supplementary material
Source: MDPI journal article supplement (https://www.mdpi.com/1999-4907/8/8/293)
Supplement: s1 [file s1 › ALGORITHM S2.txt]

PHI<-function (x,y,I,S,gamma){		# input required: trees coordinates (vectors; x y), infection status (vector; I), sampling time (vector; S), gamma value (vector; gamma, from LAMBDA function)
um<-unique(gamma)   	
um<-um[-which(is.na(um))]
l<-length(um)
switch<-numeric(l)	
xmed<-numeric(l)	
ymed<-numeric(l)	
fy<-numeric(l)		
ly<-numeric(l)		
for( i in 1:l)
{
ind1<-numeric()				
ind1<-which(gamma==um[i])
miny<-min(S[ind1])			
maxy<-max(S[ind1])
inf1<-I[ind1][S[ind1]==miny]	
inf2<-I[ind1][S[ind1]==maxy]	
logic1<-(miny!=maxy)			
logic2<-(length(unique(inf1))==1)		
logic3<-(length(unique(inf2))==1)					
ifelse((logic1&logic2&logic3&inf1[1]==0&inf2[1]==0),switch[i]<-1,
ifelse((logic1&logic2&logic3&inf1[1]==0&inf2[1]==1),switch[i]<-2,
ifelse((logic1&logic2&logic3&inf1[1]==1&inf2[1]==0),switch[i]<-3,
ifelse((logic1&logic2&logic3&inf1[1]==1&inf2[1]==1),switch[i]<-4,switch[i]<-NA
)
)
)
)	
ifelse((is.na(switch[i])==T),xmed[i]<-NA,xmed[i]<-mean(x[ind1]))		
ifelse((is.na(switch[i])==T),ymed[i]<-NA,ymed[i]<-mean(y[ind1]))
ifelse((is.na(switch[i])==T),fy[i]<-NA,fy[i]<-miny)
ifelse((is.na(switch[i])==T),ly[i]<-NA,ly[i]<-maxy)
}
return(cbind(switch,xmed,ymed,fy,ly)[is.na(switch)==F,])			# output provided: coordinates (xmed, ymed) of resampled and recovered trees, with corresponding code (switchcode), first (fy) and last (ly) sampling year. The output is a matrix.		
}
