# Supplementary material
Source: MDPI journal article supplement (https://www.mdpi.com/1999-4907/8/8/293)
Supplement: s1 [file s1 › DATASET S1.csv]

n	x	y
1	389096.25951	4990996.80940
2	389096.58920	4990997.17245
3	389096.61900	4990997.24416
4	389096.48830	4990996.77625
5	389096.39910	4990996.51528
6	389096.41140	4990996.51506
7	389096.16949	4990996.84083
8	389095.94180	4990996.90869
9	389095.74633	4990997.41353
10	389096.46090	4990998.45398
11	389097.19942	4990999.93711
12	389097.22076	4991000.17356
13	389097.50167	4991000.05269
14	389097.21447	4990999.61389
15	389096.64255	4990999.16269
16	389097.16907	4990999.91819
17	389096.97905	4990999.88816
18	389097.08012	4990999.30440
19	389097.01075	4990999.16462
20	389097.02379	4990998.83936
21	389097.04603	4990998.27919
22	389097.15823	4990997.48619
23	389096.94178	4990997.40800
24	389097.13814	4990996.78438
25	389096.98723	4990996.56963
26	389096.86813	4990996.45711
27	389096.49425	4990996.94839
28	389096.26240	4990996.66420
29	389096.02366	4990996.38013
30	389095.65016	4990996.61096
31	389095.51142	4990996.35988
32	389095.42135	4990996.10587
33	389095.27982	4990996.14653
34	389095.18895	4990997.74063
35	389095.20174	4990998.19254
36	389095.44118	4990997.47094
37	389095.59468	4990997.15643
38	389095.80507	4990997.84728
39	389095.87862	4990999.72605
40	389096.35965	4991000.46983
41	389096.85205	4991000.39667
42	389097.02052	4990999.58463
43	389096.09179	4990999.36119
44	389095.95418	4990999.48582
45	389095.97262	4990999.75358
46	389096.17001	4990999.75431
47	389096.46981	4990999.22057
48	389096.84365	4990998.30216
49	389097.20141	4990997.33681
50	389097.22367	4990996.60857
51	389096.96374	4990996.37905
52	389095.35186	4990995.53480
53	389096.19109	4990995.56533
54	389097.37539	4990996.98305
55	389097.42289	4990997.81703
56	389097.38179	4990998.45323
57	389097.66619	4990998.70247
58	389097.44614	4990998.27639
59	389097.43296	4990997.71685
60	389097.36555	4990997.46383
61	389097.24707	4990997.64160
62	389096.58074	4990997.50596
63	389096.35141	4990997.56482
64	389095.75109	4990997.65862
65	389094.93054	4990997.40134
66	389094.64655	4990998.61752
67	389094.71722	4990999.34067
68	389095.17161	4990999.74183
69	389095.49325	4991000.17933
70	389095.75734	4991000.53449
71	389096.02251	4991000.61182
72	389096.73104	4991000.37238
73	389097.29050	4990999.96677
74	389097.29256	4991000.42442
75	389097.35005	4991001.01237
76	389097.54678	4991001.45621
77	389097.62651	4991001.48399
78	389097.65478	4991000.22435
79	389097.98683	4990999.22402
80	389098.17265	4990998.56031
81	389098.44044	4990997.68611
82	389098.72876	4990997.02964
83	389098.84622	4990996.93453
84	389098.86348	4990996.96479
85	389098.77761	4990997.03643
86	389098.72763	4990997.02132
87	389097.47815	4990996.63748
88	389096.89467	4990996.36983
89	389096.76487	4990996.29292
90	389096.98770	4990996.05915
91	389096.98042	4990996.43293
92	389097.02131	4990997.11353
93	389096.94846	4990997.87668
94	389096.57206	4990999.29796
95	389096.40810	4990999.54876
96	389096.18991	4990999.25808
97	389096.06772	4990998.79836
98	389095.73533	4990998.39369
99	389095.56026	4990998.28908
100	389095.38023	4990998.54988
101	389095.59441	4990996.51887
102	389095.80546	4990996.56937
103	389095.86799	4990996.57036
104	389095.94045	4990996.49201
105	389095.80192	4990996.47914
106	389095.94333	4990996.71351
107	389096.20272	4990996.85553
108	389096.43504	4990996.88344
109	389096.67944	4990996.81459
110	389096.84611	4990996.63390
111	389096.80723	4990996.46442
112	389096.69420	4990996.44624
113	389096.64530	4990996.40820
114	389096.42579	4990996.32382
115	389096.18283	4990996.27805
116	389095.92673	4990996.35404
117	389095.84589	4990996.23391
118	389095.86083	4990995.62178
119	389095.93208	4990995.36079
120	389095.96700	4990995.41574
121	389096.08804	4990995.63935
122	389096.12983	4990995.69349
123	389096.20418	4990995.52552
124	389096.71267	4990995.98060
125	389096.80934	4990996.64218
126	389096.46905	4990997.11273
127	389096.47078	4990997.69262
128	389096.34266	4990998.19282
129	389096.35222	4990998.65728
130	389096.36117	4990999.25649
131	389096.44752	4990999.21193
132	389096.74052	4990999.10751
133	389096.77904	4990999.65203
134	389096.63971	4991000.07394
135	389096.57193	4991000.28001
136	389096.45662	4990998.91521
137	389096.04054	4990997.06741
138	389095.94712	4990996.25298
139	389095.76545	4990995.85402
140	389096.13042	4990995.64278
141	389095.94129	4990995.21131
142	389095.48473	4990995.67486
143	389095.41530	4990995.78650
144	389095.44731	4990995.90053
145	389095.49731	4990996.11496
146	389095.70431	4990996.30027
147	389095.60425	4990996.71663
148	389095.79224	4990996.68627
149	389095.85932	4990996.97750
150	389095.91924	4990997.05493
151	389096.07578	4990996.85774
152	389095.97565	4990996.59141
153	389095.78377	4990996.42598
154	389095.62924	4990996.34255
155	389095.40601	4990996.38394
156	389095.41082	4990996.43386
157	389095.64238	4990996.55970
158	389095.46918	4990997.41141
159	389095.43409	4990997.68566
160	389095.21340	4990998.07079
161	389095.07891	4990998.26204
162	389095.02568	4990998.39909
163	389094.91375	4990998.72677
164	389094.73355	4990999.28899
165	389094.58111	4990999.66460
166	389094.62503	4990999.27560
167	389094.61585	4990998.88961
168	389094.57527	4990998.87712
169	389094.57756	4990998.95209
170	389094.66351	4990998.82836
171	389094.95030	4990998.81920
172	389095.31786	4990999.77401
173	389095.53114	4991000.63149
174	389095.73967	4991001.32863
175	389095.34328	4991000.66879
176	389095.26056	4990999.79028
177	389095.31114	4990999.16156
178	389095.32342	4990998.73631
179	389095.36491	4990998.32026
180	389095.24810	4990998.14172
181	389095.42317	4990997.90671
182	389095.51039	4990997.79962
183	389095.59591	4990997.73563
184	389095.73512	4990997.64639
185	389095.79068	4990997.67112
186	389095.77503	4990997.64848
187	389095.66809	4990997.41490
188	389095.52657	4990997.28679
189	389095.47407	4990997.21131
190	389095.38926	4990997.08986
191	389095.32792	4990996.76103
192	389095.37393	4990996.71786
193	389095.47173	4990996.73769
194	389095.65583	4990997.27621
195	389095.73508	4990997.27622
196	389095.79096	4990997.15023
197	389095.51504	4990997.21824
198	389095.18973	4990997.27668
199	389094.91354	4990997.30094
200	389094.66508	4990997.22192
