# Supplementary material
Source: MDPI journal article supplement (https://www.mdpi.com/1999-4907/8/8/293)
Supplement: s1 [file s1 › DATASET S2.csv]

seed values	seed values	seed values	seed values	seed values	seed values
oaks scnenario 10 m	oaks scnenario 500 m	tanoak scnenario 10 m	tanoak scnenario 500 m	bay laurel scnenario 10 m	bay laurel scnenario 500 m
869495	335215	929711	154564	144817	525876
190786	808686	353163	120773	57691	610814
30749	100656	150672	252899	260840	4511
997795	789318	817627	15508	361529	192856
636401	660832	492104	263775	765395	538012
745196	819495	488080	510912	430046	486282
117930	713191	316720	138336	482361	22427
889054	77979	242583	715817	428711	428866
555359	46994	530692	880342	501737	101503
27349	253366	906012	27612	270451	331340
343159	983717	941464	145405	979655	911550
190261	283138	631966	563506	92551	488237
929807	575865	160880	630715	31279	390226
898387	662927	30407	286704	327318	55595
156847	313758	658294	487170	748567	427681
980544	670054	236440	115794	424425	436208
841669	956908	353172	53342	172543	319947
928933	714871	922602	885590	981732	751310
700087	746907	419562	655030	2158	408228
286776	443278	669449	238370	865572	591900
220455	77917	772389	369120	425541	578628
525640	412288	62564	749411	63686	312669
343562	814365	866859	64071	876540	389840
92891	161881	222689	301860	9569	704257
663445	302178	727517	795560	317671	435751
446093	874904	416959	640332	478972	703787
585366	616791	816303	930405	371363	120165
705695	384966	547176	932804	345991	438295
937355	234664	319310	619885	951645	980187
230363	95097	162221	699584	852081	114511
550058	913227	734790	869809	643376	166422
315228	722882	716998	759785	883424	77421
648588	955738	367795	57735	231465	372416
391802	159181	846136	265385	995139	423043
612924	27897	932723	812136	269294	839439
421714	280993	137607	258605	50836	911470
930964	884160	667888	425969	434847	297645
791732	34680	494754	721539	929200	698955
313485	261064	542153	155197	489888	774154
455548	310681	385928	906416	997134	215143
162819	67453	743337	432114	225496	750752
349999	586565	6129	762549	807501	376430
505771	47609	86140	552948	72025	158611
895905	98884	409307	96890	595548	424890
585919	710249	734832	96114	706087	219219
509969	38959	651760	735125	445188	995949
618188	458984	238502	271070	837539	577750
404900	183529	684015	950581	871984	250603
497181	964910	317769	510751	690583	372720
164697	573355	638702	642769	674933	569496
926109	118734	314395	490382	901865	321327
549178	779161	583839	552724	279613	213589
673523	252422	969268	69968	265481	409836
827439	470171	608592	683139	167876	307081
746632	820534	796774	609263	908478	833843
499646	364259	640827	683712	864353	526661
295053	971862	37393	846575	330973	15639
739713	312517	807455	326918	880136	78083
274647	921559	970151	939764	274663	790116
463579	450905	663054	252614	567388	229900
172625	566911	451758	461461	6487	794170
596476	235534	717262	686169	183710	168069
491976	271448	44526	20426	883561	198217
824437	34331	306174	74689	890933	670201
943843	797142	251592	585602	831776	919055
125255	716675	717055	165709	996625	257509
886508	822705	212859	899183	850662	65743
466905	282506	390706	845940	267840	279216
631272	129291	114576	345782	762728	543034
105518	966815	929539	215077	966109	290547
951125	776752	367343	552805	593921	643038
974644	603766	274244	68210	826588	182245
698261	241719	631621	367390	295234	889177
535030	586186	347329	71953	451989	381351
762175	96574	584264	19281	159946	364618
482848	339862	812978	182617	148031	400394
562092	81308	430094	563048	74226	392149
659003	781370	249638	225638	69808	233455
330831	868570	859678	809787	181117	258564
888587	627750	458195	168515	908854	446618
832626	25779	367624	559593	533991	114161
485214	188473	935504	113008	35781	64212
208619	277631	574561	967502	653573	894739
678074	159294	298883	419905	654883	957031
817672	100067	295664	321489	465675	253882
374678	873014	715338	51503	440865	536584
166663	836878	316534	800236	720612	18507
284581	598848	965747	26753	902297	214478
402484	398357	961913	114563	341603	362751
797665	629319	774405	302820	471755	534074
995295	304485	297865	808175	946558	324885
97214	141765	326054	266631	556812	525867
951816	367914	224114	627023	313903	609814
463342	558545	267720	792644	665513	284496
420258	188759	720946	132161	602114	361416
115250	296936	193249	243252	348185	690496
338473	658025	835687	47288	148591	58913
7771	266789	383596	882278	321185	784641
496921	734316	912794	547560	530278	298486
332744	286349	92476	502902	607586	784946
901585	150586	715014	859349	92704	397267
942775	984740	92994	811779	615134	161943
464210	179789	884408	981130	47494	443750
708254	391227	681532	782701	186379	431992
648958	298796	606544	386214	489117	847836
684177	611682	378402	285344	560460	181118
566061	496576	261430	13403	104262	969950
986888	454498	561363	663360	531240	123328
576942	684506	842811	777120	372545	350802
10812	83515	29637	937450	644602	116413
13264	612828	574604	526973	319055	924918
254598	994137	699532	998724	252407	519667
429961	212019	669227	230289	96276	979184
71437	856644	448041	460605	161199	234028
253088	151283	269948	630981	200635	871132
997300	601057	865626	438759	276250	978392
575991	374648	370040	375449	529189	895555
218349	412056	970848	217812	874990	66893
311522	778815	588090	359669	132018	159579
112810	147317	355750	398187	847422	394980
864438	132334	354346	605499	771393	706748
600927	290701	813522	299989	953922	551149
534746	440571	400606	206136	265105	941017
97449	513382	469374	937698	613939	268907
907502	738505	516871	96691	873074	636638
156030	90573	345072	778470	834063	527352
551164	245688	621897	599282	820636	680195
413358	47366	424833	351437	160806	61235
989035	311195	504139	168535	776999	14632
965477	8202	960826	474416	865466	170111
665832	716646	940463	328492	192388	335882
126978	39850	211050	290505	681555	829983
642997	853187	552829	849045	523547	727900
896917	633021	364168	535913	305544	948840
829621	313404	597268	751275	373523	467559
352761	14468	27554	40430	296873	156636
341524	425923	478196	448399	449478	816359
438815	45623	553282	644850	317460	803380
710456	373170	444989	943811	859184	441796
607321	655331	962974	141321	124469	404010
832142	503711	57312	598139	432455	507138
521342	738849	594315	748822	572270	805357
425065	40945	125304	375410	755819	94386
561440	158930	835035	33356	933407	854233
613181	346156	141437	439804	939675	340130
398035	462036	21511	855933	969432	565807
772493	300734	793730	508318	454150	112713
526023	156201	509619	671090	229766	764912
102052	858725	542362	401842	188471	632771
829120	113444	306616	406350	91317	227003
61685	953089	793869	697362	26580	782649
49161	283360	791607	156468	879122	497888
493721	76652	766897	496262	529171	530295
495035	675719	923861	299212	452476	860321
38095	389785	838466	824367	842235	190754
162177	768347	205938	911243	448714	496677
398320	89290	998954	275800	863192	743777
127121	305690	715084	78354	263739	896598
519300	920584	563732	446977	214923	167197
84959	835758	777519	979957	81873	282922
855143	886913	397052	142502	920367	817248
589326	257628	156724	464661	158699	688510
945714	220002	376153	755502	621628	250847
721637	262563	149867	69495	248139	260023
376118	599519	321779	328607	146327	520695
950250	391155	876680	889927	285565	758379
350465	589900	453151	939383	876464	699885
500783	815320	454547	3591	312473	480642
306766	52173	560041	634661	639776	771476
253784	507412	86518	597062	197627	833315
393980	103726	219304	613617	688327	937609
679827	559079	362008	851387	558553	539062
966292	280406	979428	902528	973018	738728
782433	92134	482682	422143	196139	9325
740986	144861	637968	417236	437129	117504
641152	123460	568245	812147	503233	821561
691845	355755	301710	716673	484740	265078
992705	638112	969448	463362	81496	225461
749124	448611	447023	982290	577990	710362
127106	966334	956272	977893	558353	452305
265280	631640	577230	126188	616123	126307
566992	281275	754848	228763	187202	580639
579712	275538	716014	770715	437059	663468
500911	885350	153847	895565	426268	628500
611180	596988	724201	943729	942779	258220
898899	995911	148255	86569	596779	914368
554725	784209	631629	804565	28038	484927
660320	678520	137155	654064	829977	637128
736604	937402	958371	578007	532711	284277
555016	731337	544230	286075	443146	38602
594961	147252	965673	144977	594643	86235
197176	650669	784492	91539	232722	528545
833514	10	44451	542320	322438	861021
129204	698249	595033	806291	755787	618877
800881	51074	7796	398228	147341	314596
660100	879967	868028	135931	923358	647947
388833	846121	134182	422981	997750	797369
301191	414591	4907	528377	909030	672438
530217	331033	737138	707341	727124	271200
691119	514940	422155	603986	952417	952637
215888	217518	963295	742760	165224	420572
903697	854432	917618	525239	154304	951790
753785	343521	410584	841256	647689	43684
884407	407173	963472	327782	313498	496749
426285	196696	887356	535791	687525	268344
668928	230802	252318	319055	947660	332192
573214	537259	772891	474065	161790	407133
441070	497222	606735	478856	672449	306948
902283	978094	431085	382364	530468	85254
760591	148298	871382	557892	158483	205878
503277	316071	60054	242138	988507	651254
212151	635918	97360	829915	158807	598249
780105	173532	94949	850356	159233	984737
592121	817372	59341	25280	146592	586183
276072	795570	498669	241957	554616	208417
298609	628321	544808	776659	38042	275321
58663	895081	390909	759229	114714	762515
701715	45229	64154	553945	932665	136496
175233	176209	980034	902467	405927	477670
262444	873499	361756	45115	108695	683791
285095	822979	501396	346902	107855	730492
625072	459836	241693	352149	791690	66326
272780	137212	248484	346396	140440	746871
229784	849553	626336	995352	398515	637278
636132	518328	547136	844116	400404	473073
46249	980250	241441	4847	655695	439029
680918	727061	6545	584658	740045	166727
63117	278205	2176	435185	580361	334858
487330	216677	550053	170072	480303	343542
651022	308980	85019	277410	326042	95854
445173	782824	269720	47050	813317	649365
694403	941559	904282	507349	848631	493918
89468	696398	700581	540365	284918	264153
631227	903804	197985	755533	800657	821670
312794	358747	731412	882989	474794	476783
742791	885405	248046	497245	302398	444856
356401	543945	718537	432811	549877	183814
741547	332504	229297	502333	306756	16002
11917	533303	101946	507493	569708	325106
516865	692184	364020	156742	142572	927207
897079	467770	870769	812966	350745	638442
159869	103480	21331	80638	293658	709063
254347	410577	248710	901138	231724	33495
320771	167633	788495	476819	101768	859764
953687	584451	376674	630339	677397	227484
806094	942798	21989	785315	420655	417540
348179	277560	420674	864428	946123	251118
363827	341144	951592	972043	20777	22467
607428	270239	831559	629077	651750	832882
808894	196915	301247	645253	7896	250250
649452	330121	278355	454653	408143	934288
900115	770713	886536	674483	150538	422269
693367	68554	120626	873933	454114	859408
936049	819339	945299	779761	502575	560647
113453	161213	127779	93234	870322	799540
247024	637758	485005	686182	747311	716650
681782	25300	731093	389929	648534	391768
37913	547594	901540	605881	783144	723763
21472	842315	533483	312525	721935	989932
234371	569241	767375	659903	531465	638297
706591	692793	904499	85899	339807	777446
483222	248179	901871	187013	38866	277196
314111	591360	561499	64297	339756	627495
285849	221972	944716	537599	838338	936119
745006	721790	505486	140176	613014	952234
501835	488971	757508	374421	353199	101616
337703	36339	632960	71074	168003	831740
274193	458572	86667	46002	643263	415808
820859	457675	88866	120010	822629	407772
245776	339004	906651	371334	765504	17473
502592	933129	435530	956894	623599	393319
348326	825733	905365	823816	946688	117233
51119	761725	133094	183161	17273	366874
898652	591819	601557	900838	916932	944782
429550	335663	458112	377106	970854	855171
982163	201980	757958	107449	632671	413669
177816	4870	486644	192134	161722	693949
367264	437701	748777	172485	544820	672692
281713	998111	646241	96996	411930	301588
692585	948912	883537	525800	273146	893745
231152	704391	311724	518340	378555	107716
358448	115208	708028	959941	688964	694020
580954	471151	486856	316590	575391	869998
732460	860000	734950	948923	4445	385860
15617	206955	938979	346700	988813	484627
336928	750185	471149	323068	861840	7748
491679	649300	526359	768222	250213	346847
746014	981745	199701	552623	635249	432625
343902	577113	904703	832035	772622	959161
215764	353462	471859	317279	341071	87
502367	287289	282909	686594	271589	932053
697908	353069	669868	935684	331023	950228
337050	630173	922168	817522	259540	228062
595372	623885	46738	624799	885186	244582
205662	941082	341341	183856	585428	562135
525638	161772	852050	215430	660176	410584
672149	205173	661457	149975	134	174086
814197	301975	635089	164634	561327	841250
32438	792053	606982	191593	971511	521320
639302	692320	899890	611941	844993	372243
429191	974450	750098	792711	147561	153196
572284	756633	112296	866941	680513	159652
980377	497749	83859	801827	559367	90416
636726	926794	168734	643674	109329	689583
24947	163545	8345	560180	964092	177460
430766	769358	710511	731236	90571	850689
340056	466797	59843	614018	886649	240582
261819	886105	887815	789453	750859	931223
533427	554496	381004	720603	354469	729993
703402	918265	710398	314374	378298	940283
25691	322469	512463	865247	732786	681304
755662	76667	917992	649091	928299	106505
14443	919248	781076	589750	607090	643504
531973	205195	906465	946762	513268	723876
936330	63854	1527	803288	892168	378224
55747	163314	706141	811509	601372	312727
303347	390379	766588	313919	817174	741273
94137	512688	32279	683071	583885	987560
634489	790023	548158	506733	56361	269666
475489	539697	183456	249431	862887	384516
574650	722648	994086	183521	705127	676212
514162	13696	106529	765156	183669	572577
463543	51089	619455	767360	947597	316867
729198	446799	977075	495954	762676	795909
861366	404885	802094	15267	809876	14776
258953	571238	685429	421996	671299	344590
125599	497056	177259	108219	11886	116671
392829	35173	838180	446733	58414	924326
269049	264828	442926	240993	324882	403777
498705	529583	444696	416255	693150	847201
473155	218548	388967	192516	282804	578480
32564	241963	998831	469470	80774	304904
715815	508269	599331	437382	542397	864052
590773	22141	163048	415512	159353	635660
459037	199697	43889	760991	314084	543744
993836	971426	225707	463906	873561	747921
272967	52109	103163	551249	112834	130827
168634	39624	508486	242011	757558	899239
605267	794438	376619	329979	41903	238240
916632	191467	932749	999122	424350	915195
713987	634688	776304	532778	227879	715171
450514	139341	945482	94385	99469	332189
410572	426266	487753	975196	974786	879772
615878	865481	680914	813547	940430	143666
681602	916997	64321	674450	816487	308331
722417	833832	18461	882689	508936	394802
24100	174482	315625	811034	41904	884491
498796	98889	769089	191350	466232	654390
265476	554784	148375	715863	641605	785461
168525	374322	246049	390669	740443	801187
137234	657611	860840	829249	730390	380264
13683	230074	286574	165391	734547	656114
779633	576740	875286	753282	371759	209238
539226	839958	813570	117348	172464	123686
617654	534311	643670	314266	618279	208905
998471	194710	896517	177957	489294	740760
966670	271116	61905	140493	656180	144979
699059	257479	724080	545925	959526	81710
726905	480261	695294	760024	545748	700384
618513	427519	47283	131163	811788	75994
708026	137537	147909	489738	320344	534147
67106	882495	705182	640933	673971	257361
552015	173288	637334	321888	454871	413749
477406	560806	285620	883593	99346	439017
436420	539748	756964	850631	387709	342449
328868	659521	43219	708934	147845	204498
570780	645907	713549	816112	49884	505201
823637	891951	939131	238789	768802	878492
627560	816006	684756	479872	194180	540014
351606	562582	278655	993385	545896	934106
410512	233611	338171	220098	239078	989700
798615	680912	504689	332599	374986	360656
439184	585169	323187	627177	453793	870544
930835	3270	830991	104893	467094	832184
781879	103621	943418	263024	344578	681327
852763	226562	642810	223421	805038	71988
109155	715968	845213	600481	938094	324630
90758	705828	135721	17890	911022	810869
621173	568096	913537	716598	454424	137377
1580	676894	88580	816537	243546	838130
412815	474034	872571	842001	875101	109332
848469	544632	835454	603991	349194	74900
813025	404991	374654	244786	154468	881527
430179	423637	981476	955198	981440	212968
311696	418093	447817	569395	498333	501452
246299	786314	987417	615215	63040	695684
795524	605777	156904	614304	399807	869942
845769	763490	340216	807476	179251	184849
79117	586989	552700	818099	137993	974994
49456	672193	377843	440741	963917	150749
988434	749548	787176	628208	136962	543720
335983	579518	596276	759687	149565	193908
890597	922555	831255	399965	47414	725492
155905	291650	562289	667579	911071	253458
754426	393728	473497	813686	124224	478106
817358	506503	520126	932221	587313	300011
22544	338977	680881	414136	629696	121241
905481	333851	674192	479792	300398	394760
894398	359757	85351	372101	902703	810067
801522	229426	642024	319314	315815	406574
403191	707579	774212	476027	141003	534031
37197	11561	885719	114549	496053	973934
770122	24947	24766	108060	455724	956000
375125	208230	693132	487707	563152	866767
464908	755485	141012	694118	157874	608708
994625	199329	367055	82688	448115	509328
983221	876281	817351	993519	672061	731551
354888	341182	730792	275134	567269	443789
338539	43759	416259	363154	35208	221409
735272	793679	660094	981649	643115	175691
591236	565887	291546	715187	770848	856097
695982	473645	482428	246560	122155	963852
357221	570266	804080	257557	491087	95856
73573	424000	239032	541595	605009	593965
387585	124773	810023	473919	905720	923034
228404	416874	86306	161315	590029	696545
247586	240204	77345	695684	624834	356803
329913	788113	102593	590321	103110	561039
619562	495531	589147	970042	319564	204788
285230	844041	885522	879603	473891	119415
154135	817847	890551	556625	951749	225102
229550	42184	127813	735468	833575	388497
188901	24017	835805	289727	284276	845475
604951	31363	982321	272327	326745	222425
61890	965537	465238	800053	144030	911812
837759	431308	250849	453458	367425	133052
901613	265603	338643	247595	251699	582870
773562	39619	804981	403121	963160	208289
949606	8953	660232	759524	972218	193026
285709	646299	597749	725096	218622	623228
82452	871510	318799	893919	511855	366195
928453	993612	930704	61301	513397	924942
663085	624732	557758	122297	533652	691930
18848	739375	216797	432610	792763	61846
312713	631003	300733	691908	267643	44041
492709	259382	513761	168338	247929	600703
738839	936128	590482	2292	758137	798554
117736	975623	783632	353161	638034	746188
665175	919643	984816	464982	874971	381261
525474	439797	22975	890902	910563	465621
499245	232331	790508	158836	20141	566029
487358	465286	746389	828375	604168	363671
621119	698819	949347	538127	321723	673161
367750	303328	580269	800494	563799	102802
663944	31045	900578	990844	751413	125361
745940	996782	300585	809872	555538	810713
833485	948443	259692	27527	116488	927928
722341	40428	91655	556082	814603	715252
218708	184435	927059	124295	101990	788685
370004	11027	236036	901303	876116	392935
480810	324394	41106	396927	650221	761017
230175	748058	417667	285088	256709	743431
559326	807143	414970	843453	255064	418059
99008	614789	676812	725236	606658	403818
623090	24884	651461	297687	735620	258900
682591	757330	470401	431873	192162	53956
419757	46872	821103	859644	196387	317579
307743	268463	141684	213068	668160	580369
434773	965754	213788	861573	303831	200440
787417	25048	847257	673714	232215	946501
130611	353543	115511	576779	301079	228893
605796	994239	869286	935382	406519	958931
115257	232750	306855	893042	524979	750223
161790	826287	478610	925858	40100	160736
703599	800567	267677	963325	741519	259368
126692	82231	692059	353319	371748	503344
289566	513534	438752	926131	275737	572567
364474	452345	605525	413821	839678	767241
581923	448084	31084	218173	280699	830104
880736	94485	596833	409564	521	30121
462102	220821	714490	783382	170376	973459
553330	404645	316331	247274	410206	318215
357739	580565	512601	235564	73022	550981
592626	20972	64605	706418	855312	621042
859381	963533	758579	162273	705804	724772
642963	761980	153454	873551	362503	953104
71635	942329	37324	432280	801655	545035
282506	835428	715719	758129	731937	419509
889661	26057	852939	714886	587632	80443
569322	115273	2890	152077	837224	12306
577999	995512	118250	172314	607052	966589
640573	573581	472529	356659	319509	919722
378966	985907	773466	839824	922862	209890
518889	927940	767709	588611	503759	31414
669996	756755	710970	75870	955641	408328
317465	960319	185515	124824	282915	565903
861957	226403	857011	780230	204389	47098
242665	994258	469366	952417	549368	996181
376338	966961	268186	643948	982664	352035
49910	221986	357121	757454	2380	914711
450259	343427	257767	683665	698493	838436
14495	57755	913682	941828	833825	206687
34602	700789	909213	8208	385068	463199
708019	133953	96910	732903	663781	470928
564865	897532	146688	520257	111279	105085
519531	459339	452211	958339	256119	170156
828023	530145	199054	975446	781069	153715
51577	164235	931632	229485	806291	298201
797568	35813	924228	112121	360477	550644
298327	631050	467409	123049	786376	623049
674749	863761	799511	548501	241351	931564
667636	590135	748397	916468	398601	597289
776645	101914	627937	751442	995899	464511
794532	614573	8798	602263	498287	823400
690009	873063	385866	482189	60232	679435
220218	158153	638094	46337	202066	455447
115165	872383	271667	785778	697629	78956
844387	494225	763060	513491	603080	884388
514529	748415	595617	344747	650187	447521
615252	328693	823596	887195	364337	677645
347620	855365	171557	504695	764248	390239
394286	317193	367178	913547	833358	495318
269872	638268	728185	923044	561277	138092
23962	795411	675005	556427	355332	187622
577500	463789	136146	195932	903055	515658
108612	526328	47904	309463	872623	243281
907664	339219	202461	230945	860882	892796
792292	180586	559299	809617	235766	748158
52846	217840	686673	781584	72035	282118
591077	217071	536874	55161	793438	115161
772208	828796	253394	819631	589251	288663
284928	828651	37801	481499	780256	209994
62938	137457	780818	523264	428789	10261
262360	386403	842604	735042	774265	331627
107390	406600	549150	847194	580667	948595
314389	765979	178504	344498	849367	350908
575384	208637	713586	75398	558802	846934
848514	812555	912781	282739	321469	782868
344727	944089	256542	774233	734071	832642
307727	957409	539018	530994	927363	560883
384464	700669	268292	49319	388027	732879
161340	73412	129513	404239	322758	692195
139787	924569	410164	315918	321684	419780
437170	88795	314881	980857	152923	852886
413523	775550	249890	991955	887808	804797
426670	677507	487895	213346	815495	539245
529701	364307	906604	145928	281183	617176
586948	134442	553918	672578	922387	100046
213938	150049	699684	280444	716061	286310
233054	964523	92879	40450	527726	460414
484434	531779	368047	102102	144543	9126
900513	329345	300377	58671	604459	2725
481417	303958	660022	280298	705574	623341
713060	391312	334118	485326	768385	60363
660689	475795	203789	263037	864827	513463
360053	128741	323150	739115	13482	159698
800077	583650	53625	142262	83524	578487
641399	178270	277366	550991	9707	827835
551124	571520	833323	740481	323855	402624
442878	23747	653026	435241	88275	739926
147937	364375	306422	409164	77610	399182
934128	669644	663995	40408	753338	887586
999040	719618	436260	573890	865933	45007
152072	410321	871511	103462	314517	815813
403290	582381	476640	99427	280489	500472
142654	656218	512081	811748	456720	934504
98121	877586	606294	678058	342712	55001
333223	691429	251060	47183	883546	290315
828631	957250	97747	480759	600369	398622
333203	547410	787986	321745	806781	925266
443511	562031	51027	623071	556840	682480
309958	108498	156124	929086	976905	984345
821276	290992	699448	206238	400038	536159
673353	556176	512095	325394	534925	159841
431529	669685	660331	387552	884015	258606
181798	90647	62562	945682	484578	236689
937019	183332	779404	312044	683949	388846
328952	216172	367811	184615	866373	921095
824971	415188	132296	701602	935574	205786
62797	700746	252756	804668	170202	798536
381315	633243	156464	969611	561725	341003
997373	298654	239395	687692	524425	67584
499480	713445	288093	399880	242643	488291
953451	272320	522763	107896	703345	145186
251817	289587	818841	812396	121324	624856
559232	752888	556004	660532	182668	285237
584990	68516	772486	973809	371840	961454
303012	500668	658410	623488	491549	475606
92520	569770	477849	721269	445242	818302
133874	466818	218958	575932	517355	123571
593718	25489	396174	870054	379930	837338
550392	419134	526270	749522	369067	973176
52462	702330	97944	72240	964706	750230
611105	964173	216461	98954	562036	168987
180236	453206	539561	46515	609581	420791
989854	7165	788612	27757	197080	188098
543503	794764	768720	177178	372014	817057
571087	967585	486028	840416	100764	711898
626037	508847	22798	230509	209231	759453
64164	276797	363867	147372	140767	131009
102515	929742	909491	426778	806079	621980
507432	479829	589577	173197	937437	286974
472239	326625	313740	665450	625855	227798
21253	514422	820393	92574	318762	726254
868639	676878	269912	708579	745777	621348
410640	137869	242071	219877	324778	885942
926017	432173	280034	227034	294192	512425
6241	527642	389244	758940	687185	552925
969667	575223	856683	592595	684232	144101
999544	815893	147537	329243	230386	998103
703499	653524	800375	598555	748347	426140
685847	356086	166136	516717	236712	153547
761866	168835	542350	516056	343013	951608
161905	700065	791751	217533	34816	327141
749969	609345	442386	583960	733037	557472
658420	823264	339134	561617	872906	930996
760421	801523	96380	870436	93166	624305
536373	796662	246260	728833	236073	553769
609106	944042	972165	811227	393384	662281
528492	782630	842303	824550	111833	178136
274674	209357	249628	35294	592715	547042
999658	810211	183089	350990	509173	498363
745391	968108	793652	977225	917076	410694
372267	861561	839487	474294	538188	7143
540928	689273	751108	292093	751121	776178
412536	774219	465206	851446	465116	574406
482788	841303	793408	396146	901877	474726
372237	451205	894029	23332	315012	727690
954894	813603	531141	582170	89698	479722
410026	563463	337455	760654	4340	962575
934441	547560	335762	441272	113696	91920
723970	893577	710583	607644	233812	366731
645965	665342	698240	395398	851168	756443
899137	367918	970229	37230	170484	345226
717021	651868	90743	470156	373012	304613
104624	255192	536448	904005	491808	595064
629604	209245	705661	295659	27844	278011
591942	552649	951048	21749	218813	302241
895616	835647	128082	935844	68618	56794
882188	782449	342612	40381	906385	109719
865354	902907	363972	778867	555532	811304
231737	678099	355141	150787	906090	685886
181536	140431	231449	923879	918561	824529
2569	515378	314331	47683	722182	695557
780372	53071	823003	8543	56327	533130
983398	870433	809577	477185	967347	976749
103442	849577	609144	216722	417118	675061
418974	351196	512017	293496	363989	33186
10435	897683	55323	410398	266490	557247
408513	418847	758333	615998	987061	46821
679435	559032	147857	886457	491321	672390
887785	649342	116848	48676	979663	775303
703918	7368	775163	776108	307671	714556
277149	120574	420450	646352	60551	322567
584832	128061	612398	403214	824511	530466
409755	963746	389073	882964	149558	280918
376116	440785	736569	939879	321594	765413
436942	621567	983842	763206	921715	929415
444524	929612	670662	483986	505930	33653
89735	853718	30518	271721	162966	95503
947222	258206	452814	991630	854651	755895
952605	821974	68490	322281	421472	928817
570668	646773	576497	904514	440908	894658
560032	112105	9876	577615	750297	248496
396978	744295	527758	761249	152681	828582
213795	320366	432365	894339	299208	366577
401929	680041	831990	164099	909850	7901
553586	566544	506161	798540	250256	247866
432516	235957	749671	746922	643915	136985
443284	369587	907254	42662	161017	118481
579148	459556	79599	490532	124979	308947
288561	511535	600824	167394	134890	606981
397941	694468	550260	306482	312121	426837
387361	90270	202546	92105	778814	228455
772402	448076	556864	896589	522329	458423
935025	282037	376528	475596	437516	660018
617690	586539	565383	726923	843320	315055
436644	352069	120068	649647	829904	81225
639304	474070	347712	865220	172424	446968
867700	607992	819890	147702	470697	640094
670523	45712	634277	905824	626405	524909
872829	720249	113553	718327	545090	311698
8684	338265	620687	749000	226118	233632
823732	243957	93664	568963	251511	720133
63133	852958	997726	270473	355039	397492
607239	455323	565518	550570	295326	788706
967762	767767	166746	955989	979196	636592
937762	747712	656204	407140	830593	258629
979721	683467	668362	291160	864818	624910
841563	313514	599754	239391	82194	654488
953009	516812	283103	686392	105893	302127
453287	814201	423045	831893	458134	308683
500313	511578	165904	281830	764137	891195
107487	984815	504351	629140	878444	367812
75306	644328	597428	84390	896520	254915
227179	311133	276978	933295	498522	721956
51972	615211	786378	1488	922638	475411
781590	814890	617844	680905	457349	13623
416856	67978	426739	389795	56546	642566
494095	356340	203067	298128	802210	902246
459599	387054	27326	395623	598080	688067
720442	545577	370603	410556	533212	502433
209068	378826	886030	733330	563907	576183
441725	813525	326108	561429	226262	41531
570624	98969	283697	945942	65973	424910
214783	209883	38623	903102	912632	256725
872654	8740	926568	251736	453968	805943
731127	414523	16698	357609	792614	713988
163830	741157	205628	978032	537043	793682
566208	538085	907679	448638	638736	798363
685442	289349	619638	727669	835608	944871
981	736748	629591	957832	394866	735205
142872	858016	103415	277024	237862	576615
653019	524295	427675	610624	515611	976190
338905	722714	542498	541779	690869	916085
849709	84303	799123	46052	695313	443206
528026	148218	483192	353578	804484	498480
813634	53643	529970	88887	523332	764581
942177	309395	527069	228240	969592	202574
907269	299504	106875	248588	958670	743731
886692	816673	469633	875106	193798	445369
830078	55249	919497	627112	799664	659144
725435	497188	822163	932820	873686	173675
68017	564849	348269	843691	963145	163516
370105	250811	55983	15013	3895	686724
500106	408248	462619	335058	980797	770942
739048	597136	968520	751935	827772	578374
458261	92978	559461	388777	228157	300841
425626	674567	279707	652865	248627	862466
661937	180676	998531	158804	683040	920575
28847	775709	851137	93398	471205	725746
841236	601407	494596	795551	866464	554790
877411	183866	52671	365926	337535	109469
285048	537394	960898	960286	817186	594215
757110	98915	961521	997379	203200	822130
444458	575089	161749	940294	793290	573437
986221	864486	88338	99016	25767	374725
816718	646015	364515	20100	59352	706446
190257	831948	51657	872849	875778	724647
930834	946932	129884	366107	137810	517550
747234	766608	365036	518287	80285	482859
735824	581693	423719	508338	160756	570446
256783	478298	596438	421883	617296	657638
879546	550648	941801	511785	556356	463956
722543	470189	450960	43703	286341	914120
958539	725802	829073	578481	167600	889636
470941	576700	651056	236511	171605	893908
822419	414076	324795	719655	529842	227594
580738	832632	225902	816196	735396	731797
369253	387139	355278	23781	198281	761473
334516	992073	539580	328367	698702	51307
98280	519784	526536	869663	116521	665945
237589	459568	385694	865581	432704	261370
189258	118665	813779	316384	106415	815187
232083	478738	339536	892499	790714	709101
137951	329810	10486	161559	378128	263307
544857	528865	756453	85466	683242	622153
334520	326939	605770	861156	291495	834428
975836	390441	847234	2681	998074	119980
289742	621413	251242	355121	172896	63119
85738	737648	212932	971276	408030	56557
398664	861800	457843	803564	45596	672035
29591	304380	606102	382759	307512	556472
475260	457218	422540	895203	130887	891944
96866	978177	939129	404031	841396	814434
261959	413749	169049	535724	660239	158645
9945	758575	901903	543561	956902	6178
901400	22993	550546	732713	571605	436059
543228	621791	373874	581657	669581	167745
921194	195226	35752	766381	929362	640073
920723	351921	327050	211552	758999	7956
457109	805826	40796	924765	51547	357524
403033	95180	207147	127856	345432	530753
740028	591455	365029	608002	41582	661529
732148	645713	896622	392726	51388	412041
266918	168537	761805	171326	19168	136485
194513	19743	606914	207813	25437	184595
674781	371198	51853	205171	765968	146147
6235	919341	544813	516786	881415	373556
347805	860910	842388	181190	308624	266421
122086	621373	586250	928948	843660	217277
880147	20973	60924	986601	750721	451112
298997	898444	957568	628037	132040	675025
32633	625583	81316	615830	728574	694195
696936	482212	806557	180257	405730	754249
238245	607724	66600	236517	850313	482204
290777	596687	852170	363375	726864	997284
849771	703982	888632	337656	35253	491448
208300	378940	685221	465597	397606	762792
468957	247650	502570	651452	78914	615324
64090	299302	552652	106499	915914	966142
520656	7817	782795	2754	950972	956174
102462	424851	242738	188217	839170	832812
947820	530596	712077	573262	979893	873304
502684	947791	712380	74251	330982	81397
167819	588506	456102	7858	696355	501599
663827	511840	149458	881661	802291	229656
151978	278431	555302	290429	449050	841335
297432	326355	111775	104065	521146	846535
48870	304975	831324	223100	745558	742007
798038	187960	350202	907232	138682	766597
1607	6263	253896	438417	431352	338411
857767	522350	716074	337921	47976	998081
858183	560303	360305	456504	601912	412003
5735	964475	266289	433222	508396	885968
974809	668577	780367	646764	321591	928911
574786	659480	609499	666561	487569	514052
18894	283492	210029	865176	851923	167635
804773	665569	55315	708826	799381	600173
655829	717691	706128	479084	951535	593122
583886	681057	854815	275983	382934	217460
516183	553560	962803	84394	705689	98113
183222	301420	762844	255023	893233	238795
253772	583969	58324	701444	579229	983940
846299	428755	359112	621586	850554	642904
971331	735157	390216	871988	634917	284962
67331	17906	880972	90318	537842	346577
829068	348534	695895	786969	47535	314453
707456	551721	893011	762953	365715	344556
678291	267829	527949	601399	58489	779716
958964	41524	238872	879297	503414	902853
944294	816539	279428	22712	99351	121428
79296	163364	914416	321266	820226	45961
39885	803127	545089	408386	263082	981197
376337	816802	978153	4335	466190	284326
984725	983775	115960	766438	72543	41981
345096	285806	188207	726551	974418	311381
832539	650122	564258	931728	767419	718998
56274	286295	819112	75813	920187	734971
233792	75868	464953	133040	285723	613102
358413	638154	547820	433139	428107	409019
340340	200817	220574	479004	96573	593107
799345	690449	911489	703852	429642	988825
789472	626771	330878	30661	813525	797633
417396	129412	309280	723277	185105	162588
761631	379547	347000	804551	836947	100116
979201	936597	652458	890155	689945	885994
708155	957361	953582	626761	786775	10399
804671	558600	729546	669386	938559	704899
834816	773940	845822	237678	469961	306320
268365	428935	763236	304788	353738	745299
872868	114310	962686	408302	992280	720599
392114	401135	801463	502370	667129	616778
462233	164992	851165	663612	113294	482517
880800	910448	684876	909996	806681	346212
867915	941402	332403	641001	476318	539887
922677	967275	919288	187853	312255	332677
92592	624092	997810	663730	891346	860791
733794	422956	403627	876934	489115	981024
948458	898944	173790	920447	778400	599662
220348	697493	806748	183637	974331	872410
241486	403277	444943	415782	654401	601761
76202	31333	168994	387200	422410	571572
246468	106183	415243	907795	363018	374185
897480	996070	444803	132825	649729	95537
226268	478502	119977	63382	5502	395947
647341	891863	439037	277491	961808	874515
623685	926524	237034	148487	870851	711576
163192	163529	494505	770595	804208	928808
860680	682960	852112	971717	769741	436866
343541	538329	9095	506839	407404	160141
331174	861673	234266	702211	377269	121028
981144	206556	856786	874949	4749	811457
369396	729978	980399	826572	187542	916699
275912	773317	558982	673145	997686	75986
36480	129648	46770	858526	744233	889811
74199	182085	59026	906909	107668	363808
185839	748465	579790	587632	7877	759171
712886	239422	907465	831161	668953	984411
99631	399228	748341	819624	56075	959437
309285	3011	958126	859241	175350	825141
921710	196934	293996	907072	374498	608816
408680	164429	348565	68874	553691	594337
443114	837514	618583	224065	584387	915495
701323	812381	270623	383053	814271	497182
960169	534195	152701	872724	358442	91365
891541	796540	106538	659401	749926	5377
574755	302134	949840	235164	925720	767375
819824	133916	544389	711731	939283	848596
460995	615512	33037	422898	698130	496361
821159	487029	876501	37	933794	980917
252332	233238	86610	37518	131818	679451
617112	553116	716712	619420	945667	475784
960536	580087	537046	411493	362776	748611
755849	442946	286533	510817	27882	832461
834882	896406	973034	675804	771090	311078
781998	90653	267242	900389	771690	411238
500852	519247	123955	792564	71935	156819
221137	482380	860962	426495	519501	779572
984130	204878	972202	274214	850126	469413
791289	198371	270392	470161	203466	137655
756499	219496	837918	831099	407446	900987
741879	469905	702755	568588	890776	608040
570479	952287	585317	324426	594364	238587
852312	382405	366222	616349	370848	783555
383590	260286	793583	658398	157061	194231
104173	866852	744962	507654	54436	752865
630125	683196	935989	733860	605637	645353
73604	604485	856467	27349	486919	856264
877197	241925	10731	23606	734490	233439
451511	584088	284631	280144	361343	143297
835695	150378	954823	983658	524061	189563
547639	931458	545041	986183	484502	811935
237533	276524	533513	215994	122026	868087
502921	662638	154422	418220	719993	386165
68867	677293	863997	980779	926199	804514
439756	320469	229032	267441	802978	251852
834099	584898	953156	496259	634738	249131
487954	598477	876872	196635	957692	341470
892362	666510	453057	987299	305730	190870
599771	926465	817240	918444	380072	259134
397728	385381	109179	334974	556415	341560
567802	350888	508884	339944	105772	137173
823507	574657	669930	758774	550636	850673
763380	102300	719932	501566	107690	190635
101348	335132	120446	152383	733313	110069
649305	496880	359942	806282	820393	601551
227745	809960	125927	231499	76525	957480
416328	83018	486360	822346	305728	161216
329509	285384	280703	465366	476205	472577
824390	157519	879698	684889	733659	265864
208376	721050	187744	877980	454157	186517
803451	636809	748435	394515	728531	604186
567020	757912	189361	728279	150499	955197
903970	775836	989971	605467	453263	978496
431141	609042	644564	133425	93089	539746
811114	110606	181346	519253	339133	79334
254243	562718	314501	214221	670396	8390
503931	79367	322014	332180	439202	999080
747263	614709	181764	843311	664001	631570
276562	13848	850221	862307	846481	925338
385954	416696	64637	212252	172226	296477
41228	882852	264448	235774	353755	927690
959729	240185	887151	799344	144023	598574
102109	30276	40962	417186	198670	692086
862919	417098	67361	606419	250637	305162
912336	465936	738284	604654	330087	239242
952258	368977	675296	200839	797237	382209
478361	854546	972041	265294	197853	988228
766663	485373	8959	421618	145366	693479
941229	621264	651804	511988	643679	587607
202765	544250	824943	476297	631890	207314
181817	918553	592914	823268	194270	905156
879328	411588	974788	751437	817468	823862
234631	380378	367985	143574	331858	369571
383131	278273	808804	146779	259463	619546
737131	140824	816453	12058	679842	662951
778198	159262	547063	401899	98175	850292
602353	469655	642902	779395	392462	247975
174863	288793	832402	848788	333980	891614
787864	198743	828206	42522	476394	107420
663829	499002	307159	347016	870690	698273
622351	436330	13414	431685	9306	480816
799303	448717	203186	125032	122739	852596
343947	895623	126628	532619	700759	648458
754577	563461	604882	265759	963583	497401
994480	318426	52104	726000	392860	648523
140975	872960	211892	329522	715859	246956
911277	255333	518782	451103	103051	264560
382395	217460	369982	179039	827997	615353
634074	781115	578365	712427	200663	563762
75256	665454	342227	350750	524032	416555
261942	340975	740412	717044	342358	709558
924868	410908	185652	18820	242586	301824
412850	771130	907970	567281	389343	915543
666085	687552	753777	443841	751945	786246
792001	674629	794785	677416	354568	248383
907786	672156	450428	135054	434552	362045
713955	98730	161840	461756	384965	821616
522329	32148	844211	539765	610638	427825
102303	578599	319027	96865	572392	171548
502953	159050	266010	933555	756490	29160
681137	786086	352718	147613	918052	555090
52089	646711	197624	60014	988705	822095
865785	566286	858885	604728	40900	241851
984607	333836	599148	673861	979136	385814
176298	805369	382307	782776	491513	673430
220507	945538	715648	241833	688944	777955
534028	838512	379146	894100	385889	272288
24384	250316	942174	837761	122871	928829
712765	716016	59164	140303	548978	109842
803589	83658	717039	751707	961224	329679
284562	3221	318505	444673	339199	743488
781345	270101	212486	611089	282408	294793
290003	867468	684739	610392	603531	403043
107623	118340	786448	677424	585925	414852
189596	784762	103042	279285	388646	658227
92233	41967	259289	376426	733496	137099
547532	189139	519403	475852	208651	668984
300486	814795	535064	372519	950213	703206
727495	685889	48507	895257	384309	14899
146190	287770	136929	269906	603354	671721
957501	584344	494508	804307	888247	966229
925367	315406	780208	965112	125415	356342
444729	416920	963578	102951	836666	704069
736586	141167	865684	553034	257275	195889
678213	817256	19165	258091	689526	806965
443973	133678	873140	422514	262677	91233
913433	249428	710135	437212	822484	141746
301980	514407	63180	227418	716183	259429
592074	272914	997112	491387	624435	126304
500704	164147	160587	241906	589587	570783
97222	397736	994888	695673	973097	780727
48276	402925	409708	493198	169416	209034
151560	867014	922901	523968	924919	586276
131270	419592	670679	179884	901947	381772
973486	204411	787216	477198	55387	415537
74714	114542	312235	622572	158897	288579
834010	609630	62572	146920	151072	485404
328456	487984	508537	30051	999611	985796
