# Supplementary material
Source: MDPI journal article supplement (https://www.mdpi.com/1999-4907/8/8/293)
Supplement: s1 [file s1 › DATASET S3.csv]

I	latwgs	longwgs	species	S	gen	x	y
0	37.245216	-122.0295	Umbellularia californica	2011	umbe	53781.76498	4133946.243
0	37.2459416	-122.0296	Umbellularia californica	2011	umbe	53777.17911	4134027.295
1	37.2459416	-122.0296	Umbellularia californica	2011	umbe	53777.17911	4134027.295
0	37.226574	-121.998944	Notholithocarpus densiflorus	2011	notho	56384.97663	4131731.967
1	37.2266674	-121.998786	Notholithocarpus densiflorus	2011	notho	56399.55626	4131741.597
1	37.22621	-121.998636	Notholithocarpus densiflorus	2011	notho	56410.18882	4131690.097
1	37.225288	-122.00091	Notholithocarpus densiflorus	2011	notho	56202.83101	4131598.396
1	37.223887	-122.004075	Notholithocarpus densiflorus	2011	notho	55913.52518	4131457.696
1	37.224759	-122.000148	Umbellularia californica	2011	umbe	56267.39024	4131536.068
1	37.2441527	-122.0300083	Umbellularia californica	2011	umbe	53730.34711	4133830.564
1	37.244883	-122.02961	Umbellularia californica	2011	umbe	53770.0292	4133909.782
0	37.2462527	-122.0285472		2011	unk	53872.48714	4134056.866
1	37.243783	-122.0302416	Umbellularia californica	2011	umbe	53707.44697	4133790.611
0	37.246816	-122.0278527	Umbellularia californica	2011	umbe	53937.476	4134116.138
0	37.2471361	-122.0266416	Umbellularia californica	2011	umbe	54046.88919	4134145.961
0	37.247311	-122.025675	Umbellularia californica	2011	umbe	54133.73679	4134160.816
0	37.2434	-122.029775		2011	unk	53746.60756	4133745.871
0	37.245	-122.031	Umbellularia californica	2011	umbe	53647.31481	4133929.35
0	37.24555	-122.03083		2011	unk	53665.66198	4133989.625
0	37.245	-122.03083		2011	unk	53662.40769	4133928.546
1	37.245	-122.03083	Umbellularia californica	2011	umbe	53662.40769	4133928.546
1	37.245	-122.03083	Umbellularia californica	2011	umbe	53662.40769	4133928.546
0	37.245	-122.03083	Umbellularia californica	2011	umbe	53662.40769	4133928.546
1	37.24472	-122.02305		2011	unk	54351.47384	4133860.678
1	37.245011	-122.031138		2011	unk	53635.12803	4133931.224
1	37.244	-122.03138		2011	unk	53607.66034	4133820.095
0	37.244	-122.03138		2011	unk	53607.66034	4133820.095
0	37.24527	-122.03138		2011	unk	53615.1755	4133961.132
1	37.429296	-122.222475	Umbellularia californica	2011	umbe	37781.87519	4155320.746
1	37.24638	-122.03027		2011	unk	53720.28988	4134079.15
1	37.24583	-122.0305	Umbellularia californica	2011	umbe	53696.61635	4134019.159
0	37.4294638	-122.222827	Umbellularia californica	2011	umbe	37751.73401	4155341.114
0	37.429296	-122.222475	Umbellularia californica	2011	umbe	37781.87519	4155320.746
0	37.429449	-122.222392	Umbellularia californica	2011	umbe	37790.17047	4155337.33
0	37.429083	-122.222581	Umbellularia californica	2011	umbe	37771.17256	4155297.611
0	37.429083	-122.222581	Umbellularia californica	2011	umbe	37771.17256	4155297.611
0	37.429083	-122.222581	Umbellularia californica	2011	umbe	37771.17256	4155297.611
0	37.429083	-122.222581		2011	unk	37771.17256	4155297.611
0	37.4563361	-122.1975861	Umbellularia californica	2011	umbe	40152.35513	4158201.68
0	37.454948	-122.198361	Umbellularia californica	2011	umbe	40075.21824	4158051.312
0	37.452783	-122.19921	Umbellularia californica	2011	umbe	39986.74368	4157815.024
0	37.451743	-122.20249	Umbellularia californica	2011	umbe	39689.93372	4157715.595
0	37.465824	-122.172973	Umbellularia californica	2011	umbe	42389.52932	4159135.14
0	37.465889	-122.174521	Umbellularia californica	2011	umbe	42252.89104	4159149.906
0	37.465801	-122.175305	Umbellularia californica	2011	umbe	42182.94938	4159143.956
0	37.463804	-122.177265	Umbellularia californica	2011	umbe	41997.21726	4158931.73
0	37.46493	-122.176539	Umbellularia californica	2011	umbe	42068.3792	4159053.242
0	37.464256	-122.175675	Umbellularia californica	2011	umbe	42140.74105	4158974.173
0	37.466949	-122.175724	Umbellularia californica	2011	umbe	42152.88274	4159273.497
0	37.481963	-122.21303	Umbellularia californica	2011	umbe	38942.97162	4161123.612
0	37.42950321	-122.2201967	Umbellularia californica	2011	umbe	37984.94157	4155332.551
1	37.42959508	-122.2203872	Umbellularia californica	2011	umbe	37968.6357	4155343.691
0	37.42934055	-122.2201042	Umbellularia californica	2011	umbe	37992.1311	4155314.031
0	37.42918693	-122.2199835		2011	unk	38001.87408	4155296.376
0	37.42932371	-122.21984		2011	unk	38015.42735	4155310.861
0	37.42881	-122.219813	Umbellularia californica	2011	umbe	38014.6508	4155253.675
0	37.42910348	-122.2200841	Umbellularia californica	2011	umbe	37992.44931	4155287.602
0	37.42920544	-122.220125	Umbellularia californica	2011	umbe	37989.4556	4155299.127
0	37.42964612	-122.2207305	Umbellularia californica	2011	umbe	37938.54465	4155351.048
1	37.42907	-122.221796	Umbellularia californica	2011	umbe	37840.61984	4155292.305
0	37.429227	-122.221995	Umbellularia californica	2011	umbe	37823.963	4155310.721
0	37.429293	-122.22252	Umbellularia californica	2011	umbe	37777.87103	4155320.634
1	37.429089	-122.222873	Umbellularia californica	2011	umbe	37745.34713	4155299.714
1	37.42899	-122.222748	Umbellularia californica	2011	umbe	37755.80753	4155288.104
0	37.429331	-122.22084	Umbellularia californica	2011	umbe	37926.90263	4155316.589
0	37.429455	-122.220414	Umbellularia californica	2011	umbe	37965.39809	4155328.265
0	37.429517	-122.218827	Umbellularia californica	2011	umbe	38106.34016	4155327.347
0	37.430682	-122.220327	Umbellularia californica	2011	umbe	37980.67119	4155464.111
0	37.471316	-122.204233	Umbellularia californica	2011	umbe	39656.03259	4159897.949
0	37.442309	-122.231899	Umbellularia californica	2011	umbe	37027.63954	4156812.417
0	37.467242	-122.175538	Umbellularia californica	2011	umbe	42171.14104	4159305.131
0	37.476015	-122.185674	Umbellularia californica	2011	umbe	41327.66785	4160328.954
0	37.467355	-122.179291	Umbellularia californica	2011	umbe	41839.60637	4159335.993
0	37.472458	-122.182041	Umbellularia californica	2011	umbe	41627.43694	4159916.161
0	37.471573	-122.182882	Umbellularia californica	2011	umbe	41547.57021	4159821.981
0	37.430183	-122.222283	Umbellularia californica	2011	umbe	37804.3532	4155418.313
0	37.429885	-122.222283	Umbellularia californica	2011	umbe	37802.51458	4155385.217
0	37.425503	-122.225947	Umbellularia californica	2011	umbe	37450.94329	4154916.575
0	37.426922	-122.222258	Umbellularia californica	2011	umbe	37786.44834	4155056.016
0	37.461096	-122.18623	Umbellularia californica	2011	umbe	41186.96683	4158674.757
0	37.46116	-122.186177	Umbellularia californica	2011	umbe	41192.05135	4158681.606
0	37.46123	-122.186142	Umbellularia californica	2011	umbe	41195.5791	4158689.209
0	37.461277	-122.18611	Umbellularia californica	2011	umbe	41198.70024	4158694.273
0	37.461375	-122.18606	Umbellularia californica	2011	umbe	41203.7276	4158704.912
0	37.460856	-122.186516	Umbellularia californica	2011	umbe	41160.1755	4158649.5
0	37.460941	-122.186438	Umbellularia californica	2011	umbe	41167.60208	4158658.559
0	37.460124	-122.185667	Umbellularia californica	2011	umbe	41230.85068	4158564.055
0	37.427175	-122.227372	Umbellularia californica	2011	umbe	37335.04991	4155109.289
0	37.467818	-122.171518	Umbellularia californica	2011	umbe	42530.52479	4159349.501
0	37.468032	-122.17177	Umbellularia californica	2011	umbe	42509.52584	4159374.496
0	37.46225	-122.21225	Umbellularia californica	2011	umbe	38890.49966	4158930.416
0	37.429271	-122.28127	Umbellularia californica	2011	umbe	32574.19435	4155608.906
0	37.433489	-122.283009	Umbellularia californica	2011	umbe	32446.49781	4156086.034
1	37.440902	-122.292189	Umbellularia californica	2011	umbe	31679.81255	4156955.101
1	37.441368	-122.292963	Umbellularia californica	2011	umbe	31614.18333	4157010.718
1	37.44364	-122.292261	Notholithocarpus densiflorus	2011	notho	31690.5623	4157259.558
1	37.44364	-122.292261	Notholithocarpus densiflorus	2011	notho	31690.5623	4157259.558
0	37.44364	-122.292261	Umbellularia californica	2011	umbe	31690.5623	4157259.558
1	37.44364	-122.292261	Umbellularia californica	2011	umbe	31690.5623	4157259.558
0	37.4696972	-122.1756472	Umbellularia californica	2011	umbe	42176.49939	4159578.338
0	37.4621861	-122.199894	Umbellularia californica	2011	umbe	39983.98284	4158862.696
0	37.4620305	-122.199516	Umbellularia californica	2011	umbe	40016.49059	4158843.562
0	37.464019	-122.210761		2011	unk	39033.21945	4159119.571
0	37.464019	-122.210761		2011	unk	39033.21945	4159119.571
0	36.50505556	-121.7705556		2011	unk	72654.12129	4050566.666
1	36.50505556	-121.7705556		2011	unk	72654.12129	4050566.666
0	36.5055	-121.7718056		2011	unk	72544.52116	4050621.58
0	36.50505556	-121.7705556	Umbellularia californica	2011	umbe	72654.12129	4050566.666
0	36.50461111	-121.7694444		2011	unk	72751.28043	4050512.371
0	36.50416667	-121.7690556	Umbellularia californica	2011	umbe	72783.68363	4050461.292
0	36.50333333	-121.7683333	Umbellularia californica	2011	umbe	72843.8401	4050365.547
0	36.50255556	-121.7673611	Umbellularia californica	2011	umbe	72926.70606	4050274.862
0	36.50125	-121.7664167	Umbellularia californica	2011	umbe	73004.17494	4050125.697
0	36.50119444	-121.7647222	Umbellularia californica	2011	umbe	73155.77235	4050111.995
0	36.50072222	-121.7637222	Umbellularia californica	2011	umbe	73242.81804	4050055.117
0	36.50063889	-121.7629444	Umbellularia californica	2011	umbe	73312.08567	4050042.408
0	36.48455	-121.747192	Umbellularia californica	2011	umbe	74635.98242	4048186.092
0	36.48455	-121.747192	Umbellularia californica	2011	umbe	74635.98242	4048186.092
0	36.48455	-121.747192	Umbellularia californica	2011	umbe	74635.98242	4048186.092
0	36.4706806	-121.7349056	Umbellularia californica	2011	umbe	75661.78877	4046591.773
1	36.4705028	-121.73465	Umbellularia californica	2011	umbe	75683.73885	4046570.902
0	36.4619417	-121.7291222	Umbellularia californica	2011	umbe	76132.72896	4045595.931
0	36.4987222	-121.7511639	Umbellularia californica	2011	umbe	74357.63039	4049777.31
0	36.4987222	-121.7511639	Umbellularia californica	2011	umbe	74357.63039	4049777.31
0	36.51036111	-121.7562917	Umbellularia californica	2011	umbe	73961.90482	4051092.39
0	36.47205	-121.7179583	Umbellularia californica	2011	umbe	77189.06441	4046669.13
0	36.45410556	-121.7025444	Umbellularia californica	2011	umbe	78473.92631	4044608.992
0	36.44623056	-121.681825	Umbellularia californica	2011	umbe	80289.84794	4043643.974
0	36.47845278	-121.7417028	Umbellularia californica	2011	umbe	75094.77431	4047484.794
0	36.47758611	-121.7418472	Umbellularia californica	2011	umbe	75077.08014	4047389.202
1	36.47938056	-121.7426	Umbellularia californica	2011	umbe	75019.40321	4047591.779
0	36.48059444	-121.7442194	Umbellularia californica	2011	umbe	74880.8431	4047733.727
0	36.4522	-121.7018833	Umbellularia californica	2011	umbe	78522.88526	4044394.513
0	36.50834722	-121.7754778		2011	unk	72231.05714	4050954.081
1	36.45741	-121.7399	Umbellularia californica	2011	umbe	75141.28048	4045140.332
0	36.45785	-121.7425	Umbellularia californica	2011	umbe	74910.48217	4045200.681
0	36.45775	-121.74334	Umbellularia californica	2011	umbe	74834.5913	4045193.292
0	36.45672	-121.74143	Umbellularia californica	2011	umbe	75000.27113	4045070.48
0	36.45558	-121.74185	Umbellularia californica	2011	umbe	74956.35968	4044945.756
1	36.45465	-121.74241	Umbellularia californica	2011	umbe	74901.03893	4044844.97
0	36.45408	-121.74303	Umbellularia californica	2011	umbe	74842.30577	4044784.421
1	36.4726694	-121.7253056		2011	unk	76533.55859	4046770.255
0	36.4941278	-121.7352667	Umbellularia californica	2011	umbe	75757.63261	4049196.832
0	36.466175	-121.7235194	Umbellularia californica	2011	umbe	76658.32216	4046041.282
0	36.466175	-121.7235194	Umbellularia californica	2011	umbe	76658.32216	4046041.282
0	36.46384	-121.72435	Umbellularia californica	2011	umbe	76571.09588	4045785.675
0	36.48350278	-121.7616111	Umbellularia californica	2011	umbe	73337.3504	4048133.751
1	36.48339167	-121.7623333	Umbellularia californica	2011	umbe	73271.9829	4048124.622
1	36.48327778	-121.762075	Umbellularia californica	2011	umbe	73294.51711	4048110.828
0	36.49999444	-121.7623861	Umbellularia californica	2011	umbe	73358.5886	4049968.37
1	36.48481667	-121.7639361	Umbellularia californica	2011	umbe	73136.1077	4048289.969
0	36.49816667	-121.7615417	Umbellularia californica	2011	umbe	73424.23044	4049761.67
0	36.50025	-121.762375	Umbellularia californica	2011	umbe	73360.98991	4049996.697
0	36.49951111	-121.7618528	Umbellularia californica	2011	umbe	73403.73769	4049912.334
0	36.50571944	-121.7699583		2011	unk	72711.32301	4050637.724
0	36.50496667	-121.7715		2011	unk	72568.9745	4050561
0	36.50532222	-121.771825		2011	unk	72541.80182	4050601.926
0	36.50645278	-121.7747083		2011	unk	72289.57954	4050740.299
1	36.50631389	-121.7689194		2011	unk	72807.72585	4050699.107
1	36.50710556	-121.77515		2011	unk	72253.58814	4050814.75
0	36.50773889	-121.77515		2011	unk	72257.08311	4050885.073
1	36.506725	-121.7730111	Umbellularia californica	2011	umbe	72443.21665	4050762.967
0	36.487	-121.751		2011	unk	74307.9874	4048474.997
1	36.482	-121.761	Umbellularia californica	2011	umbe	73383.88155	4047964.174
0	36.482	-121.766	Umbellularia californica	2011	umbe	72935.54549	4047986.388
1	36.481	-121.765	Umbellularia californica	2011	umbe	73019.70957	4047870.907
1	36.481	-121.764	Umbellularia californica	2011	umbe	73109.37798	4047866.463
1	36.479	-121.763	Umbellularia californica	2011	umbe	73188.04498	4047639.947
0	36.5112972	-121.757475	Notholithocarpus densiflorus	2011	notho	73860.98781	4051201.581
0	36.5112972	-121.757475	Umbellularia californica	2011	umbe	73860.98781	4051201.581
0	36.5112972	-121.757475		2011	unk	73860.98781	4051201.581
0	36.5112972	-121.757475		2011	unk	73860.98781	4051201.581
0	36.49986667	-121.7680667	Umbellularia californica	2011	umbe	72848.63962	4049979.434
0	36.4700111	-121.7014472	Notholithocarpus densiflorus	2011	notho	78658.65883	4046370.23
0	36.50044444	-121.7627222	Umbellularia californica	2011	umbe	73330.93484	4050019.83
0	36.50158333	-121.7626389	Umbellularia californica	2011	umbe	73344.66964	4050145.918
0	36.47057	-121.72189	Umbellularia californica	2011	umbe	76828.41225	4046522.103
0	36.47057	-121.72189		2011	unk	76828.41225	4046522.103
0	36.444	-121.681	Umbellularia californica	2011	umbe	80351.80806	4043392.71
0	36.444	-121.681	Umbellularia californica	2011	umbe	80351.80806	4043392.71
0	36.4071417	-121.664825	Umbellularia californica	2011	umbe	81604.54977	4039229.817
0	36.3941722	-121.6613611	Umbellularia californica	2011	umbe	81845.75817	4037774.747
0	36.3872722	-121.6688806	Umbellularia californica	2011	umbe	81133.64553	4037041.311
0	36.3872722	-121.6688806	Umbellularia californica	2011	umbe	81133.64553	4037041.311
0	36.4265722	-121.6201194	Umbellularia californica	2011	umbe	85720.35746	4041193.793
0	36.4265722	-121.6201194	Umbellularia californica	2011	umbe	85720.35746	4041193.793
0	36.5307222	-121.8332694		2011	unk	67175.74884	4053697.643
0	36.4809278	-121.7338056	Umbellularia californica	2011	umbe	75816.44924	4047724.716
0	36.52855	-121.8036	Umbellularia californica	2011	umbe	69822.43644	4053323.032
0	36.54281667	-121.7982	Umbellularia californica	2011	umbe	70385.51911	4054882.989
0	36.525199	-121.8076		2011	unk	69445.35059	4052968.879
0	36.5369	-121.7986167		2011	unk	70315.34655	4054227.877
0	36.4712417	-121.7004694	Umbellularia californica	2011	umbe	78753.02495	4046502.582
0	37.85988889	-122.1565556	Umbellularia californica	2011	umbe	46256.08792	4202820.106
0	37.85938889	-122.1564722		2011	unk	46260.35595	4202764.169
0	37.85894444	-122.1554444	Umbellularia californica	2011	umbe	46348.12352	4202709.796
0	37.85875	-122.1548333		2011	unk	46400.73738	4202685.222
0	37.85905556	-122.1554444	Umbellularia californica	2011	umbe	46348.80688	4202722.137
0	37.86252778	-122.1528333		2011	unk	46600.06615	4203095.036
0	37.86255556	-122.1514444	Umbellularia californica	2011	umbe	46722.52821	4203091.353
0	37.86369444	-122.1511944		2011	unk	46751.53913	4203216.62
0	37.86377778	-122.1505833		2011	unk	46805.85712	4203222.899
0	37.86411111	-122.1505833		2011	unk	46807.9053	4203259.918
0	37.851475	-122.1360444		2011	unk	48010.5975	4201785.83
0	37.85154167	-122.135875		2011	unk	48025.92354	4201792.411
0	37.75598333	-122.1428222	Umbellularia californica	2011	umbe	46828.65753	4191213.468
0	37.75559167	-122.1401278	Umbellularia californica	2011	umbe	47063.84472	4191156.881
0	37.75557222	-122.1394111	Umbellularia californica	2011	umbe	47126.92222	4191151.24
0	37.75661667	-122.1436083	Umbellularia californica	2011	umbe	46763.21877	4191287.627
0	37.75321944	-122.138775	Umbellularia californica	2011	umbe	47168.62366	4190886.853
0	37.7532	-122.1394167	Umbellularia californica	2011	umbe	47111.91977	4190887.81
0	37.75266667	-122.1417778	Umbellularia californica	2011	umbe	46900.45492	4190840.046
0	37.75234722	-122.1427139	Umbellularia californica	2011	umbe	46815.95411	4190809.116
0	37.75144444	-122.1412611	Umbellularia californica	2011	umbe	46938.54028	4190701.796
0	37.75177222	-122.1382806	Umbellularia californica	2011	umbe	47203.37081	4190723.725
0	37.75630556	-122.143925	Umbellularia californica	2011	umbe	46733.38891	4191254.614
1	37.75750833	-122.10185	Umbellularia californica	2011	umbe	50450.67847	4191184.534
0	37.752699	-122.119855	Umbellularia californica	2011	umbe	48833.80887	4190737.361
0	37.755045	-122.11464		2011	unk	49307.94444	4190972.691
0	37.904148	-122.175351	Umbellularia californica	2011	umbe	44874.48513	4207827.427
0	37.904148	-122.175351	Umbellularia californica	2011	umbe	44874.48513	4207827.427
0	37.904148	-122.175351	Umbellularia californica	2011	umbe	44874.48513	4207827.427
0	37.904148	-122.175351	Umbellularia californica	2011	umbe	44874.48513	4207827.427
0	37.904148	-122.175351		2011	unk	44874.48513	4207827.427
0	37.904258	-122.174515	Umbellularia californica	2011	umbe	44948.73265	4207835.551
0	37.9043806	-122.1744861	Umbellularia californica	2011	umbe	44952.03337	4207849.025
0	37.9043806	-122.1744861	Umbellularia californica	2011	umbe	44952.03337	4207849.025
0	37.8392944	-122.2186917	Umbellularia californica	2011	umbe	40656.60043	4200837.68
0	37.6672972	-121.8883528	Umbellularia californica	2011	umbe	68750.58366	4180159.244
0	37.8852056	-122.1336194	Umbellularia californica	2011	umbe	48430.74103	4205520.169
0	37.8828944	-122.1270389	Umbellularia californica	2011	umbe	48995.82127	4205231.553
0	37.9079583	-122.1067222		2011	unk	50936.96069	4207916.786
0	37.9044722	-122.1714861		2011	unk	45216.59738	4207844.515
0	37.9044722	-122.1714861	Umbellularia californica	2011	umbe	45216.59738	4207844.515
0	37.9044722	-122.1714861	Umbellularia californica	2011	umbe	45216.59738	4207844.515
0	37.9044722	-122.1714861	Umbellularia californica	2011	umbe	45216.59738	4207844.515
0	37.9044722	-122.1714861	Umbellularia californica	2011	umbe	45216.59738	4207844.515
0	37.9044722	-122.1714861	Umbellularia californica	2011	umbe	45216.59738	4207844.515
0	37.9044722	-122.1714861		2011	unk	45216.59738	4207844.515
0	37.9044722	-122.1714861	Umbellularia californica	2011	umbe	45216.59738	4207844.515
0	37.9044722	-122.1714861		2011	unk	45216.59738	4207844.515
0	37.98079722	-122.2825889	Umbellularia californica	2011	umbe	35921.36921	4216871.179
1	37.97931111	-122.2787111	Umbellularia californica	2011	umbe	36252.88593	4216686.731
0	37.9805833	-122.2811194	Umbellularia californica	2011	umbe	36049.20305	4216840.07
0	37.980575	-122.2855444	Umbellularia californica	2011	umbe	35660.14248	4216861.286
1	37.97881389	-122.2769083	Umbellularia californica	2011	umbe	36408.23626	4216622.497
1	37.97921111	-122.2780583	Umbellularia californica	2011	umbe	36309.64398	4216672.362
0	37.865928	-122.097965		2011	unk	51451.79711	4203206.695
0	37.86585	-122.09825		2011	unk	51426.23042	4203199.407
0	37.8659	-122.0980667		2011	unk	51442.67283	4203204.076
0	37.86596667	-122.0978667		2011	unk	51460.68692	4203210.516
0	37.86608333	-122.0979		2011	unk	51458.46457	4203223.633
0	37.86705	-122.0977		2011	unk	51481.95187	4203330.025
0	37.86725	-122.0976667		2011	unk	51486.09995	4203352.076
0	37.8657	-122.0977667		2011	unk	51467.86951	4203180.418
0	37.8673861	-122.1704722		2011	unk	45076.94102	4203720.718
1	37.8673861	-122.1704722	Umbellularia californica	2011	umbe	45076.94102	4203720.718
0	37.80722222	-122.1858333	Umbellularia californica	2011	umbe	43352.47752	4197114.035
0	37.80722222	-122.1858333	Umbellularia californica	2011	umbe	43352.47752	4197114.035
0	37.80722222	-122.1858333	Umbellularia californica	2011	umbe	43352.47752	4197114.035
0	37.80722222	-122.1858333		2011	unk	43352.47752	4197114.035
0	37.80722222	-122.1858333		2011	unk	43352.47752	4197114.035
0	37.80722222	-122.1822861		2011	unk	43665.04469	4197096.651
0	37.80722222	-122.1822861		2011	unk	43665.04469	4197096.651
0	37.80722222	-122.1822861		2011	unk	43665.04469	4197096.651
0	37.8673472	-122.1704694		2011	unk	45076.94757	4203716.384
0	37.8673472	-122.1704694		2011	unk	45076.94757	4203716.384
0	37.870232	-122.262889	Umbellularia californica	2011	umbe	36957.9368	4204492.829
0	37.870856	-122.261846	Umbellularia californica	2011	umbe	37053.68454	4204556.942
0	37.871596	-122.263813	Umbellularia californica	2011	umbe	36885.15274	4204648.923
0	37.869971	-122.262889	Umbellularia californica	2011	umbe	36956.2976	4204463.841
0	37.871673	-122.263743	Umbellularia californica	2011	umbe	36891.79937	4204657.127
0	37.870284	-122.263735	Umbellularia californica	2011	umbe	36883.77854	4204502.817
0	37.871627	-122.263774	Umbellularia californica	2011	umbe	36888.78111	4204652.172
0	37.869864	-122.26301	Umbellularia californica	2011	umbe	36944.97226	4204452.56
0	37.870881	-122.265557	Umbellularia californica	2011	umbe	36727.1145	4204578.197
0	37.870405	-122.265537	Umbellularia californica	2011	umbe	36725.88429	4204525.23
0	37.870125	-122.264913	Umbellularia californica	2011	umbe	36779.0642	4204491.024
0	37.870309	-122.264835	Umbellularia californica	2011	umbe	36787.08766	4204511.072
0	37.871457	-122.265292	Umbellularia californica	2011	umbe	36754.06517	4204640.851
0	37.870222	-122.265435	Umbellularia californica	2011	umbe	36733.71484	4204504.397
0	37.870207	-122.265513	Umbellularia californica	2011	umbe	36726.75317	4204503.12
0	37.871796	-122.263813	Umbellularia californica	2011	umbe	36886.4091	4204671.136
0	37.823017	-122.197076	Umbellularia californica	2011	umbe	42459.63401	4198923.418
0	37.821452	-122.198794	Umbellularia californica	2011	umbe	42298.58359	4198758.049
0	37.821452	-122.198794	Umbellularia californica	2011	umbe	42298.58359	4198758.049
0	37.821952	-122.198354	Umbellularia californica	2011	umbe	42340.44565	4198811.417
0	37.820362	-122.199261	Umbellularia californica	2011	umbe	42250.68603	4198639.286
1	37.886599	-122.259979	Umbellularia californica	2011	umbe	37316.89804	4206296.151
1	37.886599	-122.259979	Umbellularia californica	2011	umbe	37316.89804	4206296.151
1	37.886599	-122.259979	Umbellularia californica	2011	umbe	37316.89804	4206296.151
1	37.886599	-122.259979	Umbellularia californica	2011	umbe	37316.89804	4206296.151
1	37.886599	-122.259979	Umbellularia californica	2011	umbe	37316.89804	4206296.151
1	37.886599	-122.259979	Umbellularia californica	2011	umbe	37316.89804	4206296.151
1	37.886599	-122.259979	Umbellularia californica	2011	umbe	37316.89804	4206296.151
1	37.886599	-122.259979	Umbellularia californica	2011	umbe	37316.89804	4206296.151
0	37.76418333	-122.1615167	Umbellularia californica	2011	umbe	45230.60878	4192215.174
0	37.75686667	-122.1427833	Umbellularia californica	2011	umbe	46837.49399	4191311.383
0	37.75645	-122.1327333	Umbellularia californica	2011	umbe	47721.11166	4191216.32
1	37.75746667	-122.1352667	Umbellularia californica	2011	umbe	47503.94047	4191341.52
0	37.75796667	-122.1382167	Umbellularia californica	2011	umbe	47246.88279	4191411.368
0	37.83993333	-122.2015	Umbellularia californica	2011	umbe	42174.79055	4200823.938
0	37.816	-122.20025	Umbellularia californica	2011	umbe	42136.51849	4198159.694
0	37.863937	-122.234624		2011	unk	39407.15651	4203653.339
0	37.863705	-122.235269		2011	unk	39348.91497	4203630.766
0	37.861467	-122.238257		2011	unk	39071.83287	4203397.005
0	37.861467	-122.238257		2011	unk	39071.83287	4203397.005
0	37.861467	-122.238257		2011	unk	39071.83287	4203397.005
0	37.861467	-122.238257	Umbellularia californica	2011	umbe	39071.83287	4203397.005
1	37.861467	-122.238257	Umbellularia californica	2011	umbe	39071.83287	4203397.005
1	37.861467	-122.238257		2011	unk	39071.83287	4203397.005
0	37.861485	-122.232648	Umbellularia californica	2011	umbe	39565.83561	4203371.228
0	37.861716	-122.235811	Umbellularia californica	2011	umbe	39288.76655	4203412.544
0	37.86171667	-122.2372667	Umbellularia californica	2011	umbe	39160.59208	4203419.828
0	37.86191667	-122.2373833	Umbellularia californica	2011	umbe	39151.57484	4203442.619
0	37.86201667	-122.23645	Umbellularia californica	2011	umbe	39234.37918	4203449.102
0	37.86225	-122.2361	Umbellularia californica	2011	umbe	39266.65522	4203473.283
0	37.86186667	-122.2364167	Umbellularia californica	2011	umbe	39236.37421	4203432.277
0	37.86186667	-122.23705	Umbellularia californica	2011	umbe	39180.61039	4203435.414
0	37.86148333	-122.2378667	Umbellularia californica	2011	umbe	39106.30212	4203396.885
0	37.86106667	-122.2383	Umbellularia californica	2011	umbe	39065.54465	4203352.756
0	37.813327	-122.212193	Umbellularia californica	2011	umbe	41067.65473	4197921.609
0	37.815209	-122.211742	Umbellularia californica	2011	umbe	41119.08186	4198128.407
1	37.817158	-122.210412	Umbellularia californica	2011	umbe	41248.36839	4198338.316
0	37.81865	-122.207644	Umbellularia californica	2011	umbe	41501.50495	4198490.39
1	37.816717	-122.204318	Umbellularia californica	2011	umbe	41782.54774	4198259.334
1	37.81723	-122.210755	Umbellularia californica	2011	umbe	41218.59532	4198348.003
0	37.816785	-122.211421	Umbellularia californica	2011	umbe	41157.15309	4198301.861
0	37.812293	-122.213244	Umbellularia californica	2011	umbe	40968.62685	4197811.95
0	37.885393	-122.253352	Umbellularia californica	2011	umbe	37892.668	4206129.248
0	37.902883	-122.265259	Umbellularia californica	2011	umbe	36954.50615	4208131.033
0	37.901773	-122.264151	Umbellularia californica	2011	umbe	37045.03695	4208002.231
0	37.865412	-122.256517	Umbellularia californica	2011	umbe	37488.71654	4203925.791
0	37.89927	-122.259961	Umbellularia californica	2011	umbe	37398.05859	4207703.371
0	37.89218333	-122.2506833	Umbellularia californica	2011	umbe	38170.14501	4206870.155
0	37.89258333	-122.2486	Umbellularia californica	2011	umbe	38356.01686	4206904.233
0	37.89801667	-122.2571167	Umbellularia californica	2011	umbe	37640.51338	4207550.017
0	37.89975	-122.2565167	Umbellularia californica	2011	umbe	37704.19925	4207739.545
0	37.89701667	-122.2559167	Umbellularia californica	2011	umbe	37739.84937	4207432.983
1	37.89498333	-122.25245	Umbellularia californica	2011	umbe	38032.20516	4207189.915
0	37.861231	-122.238523		2011	unk	39046.9357	4203372.112
0	37.861402	-122.238747		2011	unk	39028.28049	4203392.214
0	37.861602	-122.23882		2011	unk	39023.10265	4203414.789
0	37.861249	-122.239903		2011	unk	38925.53425	4203380.95
0	37.861091	-122.239175		2011	unk	38988.64966	4203359.794
0	37.862476	-122.23694		2011	unk	39194.10339	4203502.544
0	37.862476	-122.23694		2011	unk	39194.10339	4203502.544
0	37.862453	-122.23708		2011	unk	39181.63239	4203500.683
0	37.88476667	-122.2686667	Umbellularia californica	2011	umbe	36540.64754	4206135.914
0	37.90096667	-122.2668167	Umbellularia californica	2011	umbe	36805.36852	4207925.957
0	37.86535	-122.2248833	Umbellularia californica	2011	umbe	40273.63409	4203762.087
0	37.86745	-122.2267	Umbellularia californica	2011	umbe	40126.77346	4204004.301
0	37.86756667	-122.2274833	Umbellularia californica	2011	umbe	40058.53499	4204021.132
0	37.86765	-122.2260833	Umbellularia californica	2011	umbe	40182.31841	4204023.465
0	37.86796667	-122.2201	Umbellularia californica	2011	umbe	40711.09251	4204029.074
0	37.8684	-122.2209333	Umbellularia californica	2011	umbe	40640.42426	4204081.316
0	37.86508333	-122.2266833	Umbellularia californica	2011	umbe	40113.48432	4203741.367
0	37.86638333	-122.2288167	Umbellularia californica	2011	umbe	39933.75203	4203896.3
0	37.851676	-122.236295	Umbellularia californica	2011	umbe	39183.43293	4202299.856
0	37.849395	-122.233541	Notholithocarpus densiflorus	2011	notho	39411.72479	4202032.883
0	37.851542	-122.237122	Notholithocarpus densiflorus	2011	notho	39109.76608	4202289.069
0	37.851426	-122.236007	Umbellularia californica	2011	umbe	39207.23426	4202270.664
0	37.850686	-122.236098	Notholithocarpus densiflorus	2011	notho	39194.59858	4202188.927
0	37.849785	-122.234552	Umbellularia californica	2011	umbe	39325.12336	4202081.203
0	37.822499	-122.195647	Umbellularia californica	2011	umbe	42582.31814	4198858.867
0	37.822557	-122.197205	Umbellularia californica	2011	umbe	42445.41971	4198872.963
0	37.822837	-122.198071	Umbellularia californica	2011	umbe	42370.86114	4198908.316
0	37.822837	-122.19811	Umbellularia californica	2011	umbe	42367.42531	4198908.508
0	37.822899	-122.19809	Umbellularia californica	2011	umbe	42369.57142	4198915.296
0	37.898692	-122.284068	Umbellularia californica	2011	umbe	35272.77872	4207759.436
0	37.899216	-122.283707	Umbellularia californica	2011	umbe	35307.85659	4207815.829
0	37.89957	-122.283121	Umbellularia californica	2011	umbe	35361.6635	4207852.217
0	37.89986	-122.282056	Umbellularia californica	2011	umbe	35457.22231	4207879.103
0	37.902216	-122.277755		2011	unk	35850.59633	4208119.286
0	37.900006	-122.281925	Umbellularia californica	2011	umbe	35469.67235	4207894.664
0	37.90001	-122.281636	Umbellularia californica	2011	umbe	35495.13202	4207893.664
0	37.900313	-122.281622	Umbellularia californica	2011	umbe	35498.27524	4207927.247
0	37.861794	-122.237542	Umbellularia californica	2011	umbe	39136.83432	4203429.781
0	37.86172	-122.23756	Umbellularia californica	2011	umbe	39134.78696	4203421.651
1	37.86233611	-122.2311083	Umbellularia californica	2011	umbe	39706.72277	4203458.136
0	37.82522222	-122.2060583	Umbellularia californica	2011	umbe	41681.99427	4199212.512
0	37.82498889	-122.2037944	Umbellularia californica	2011	umbe	41879.98674	4199175.456
0	37.825737	-122.20332	Umbellularia californica	2011	umbe	41926.41968	4199256.209
0	37.82846111	-122.2025528	Umbellularia californica	2011	umbe	42010.9009	4199554.982
0	37.82913889	-122.2024111	Umbellularia californica	2011	umbe	42027.58708	4199629.561
1	37.82967778	-122.2028806	Umbellularia californica	2011	umbe	41989.57094	4199691.721
0	37.85118611	-122.2102083	Umbellularia californica	2011	umbe	41477.70183	4202116.577
0	37.85056667	-122.2085222	Umbellularia californica	2011	umbe	41622.33943	4202039.473
0	37.85118889	-122.2082694	Umbellularia californica	2011	umbe	41648.46765	4202107.333
0	37.85048611	-122.2047139	Umbellularia californica	2011	umbe	41957.21842	4202011.773
0	37.85042222	-122.2036917	Umbellularia californica	2011	umbe	42046.84226	4201999.646
0	37.84890278	-122.2086639	Umbellularia californica	2011	umbe	41599.52377	4201855.374
1	37.85086111	-122.2038028	Umbellularia californica	2011	umbe	42039.78226	4202048.937
0	37.9248833	-122.2912667	Umbellularia californica	2011	umbe	34804.76214	4210704.438
0	37.9251167	-122.29095	Umbellularia californica	2011	umbe	34834.10059	4210728.775
0	37.9253833	-122.2904667	Notholithocarpus densiflorus	2011	notho	34878.30591	4210755.965
0	37.9256333	-122.2900167	Umbellularia californica	2011	umbe	34919.47633	4210781.479
0	37.9253167	-122.2891333	Umbellularia californica	2011	umbe	34995.19509	4210741.892
0	37.9251667	-122.28835	Umbellularia californica	2011	umbe	35063.16059	4210721.311
0	37.884018	-122.268924	Umbellularia californica	2011	umbe	36513.28942	4206054.045
0	37.884033	-122.268866		2011	unk	36518.48934	4206055.422
0	37.93758333	-122.3211111	Umbellularia californica	2011	umbe	32259.834	4212264.896
0	37.924329	-122.30197	Umbellularia californica	2011	umbe	33859.58485	4210696.531
0	37.884002	-122.268885		2011	unk	36516.62185	4206052.073
0	37.927347	-122.296691	Umbellularia californica	2011	umbe	34343.13109	4211005.253
0	37.888782	-122.262192	Umbellularia californica	2011	umbe	37135.81512	4206549.623
0	37.92879167	-122.3009111	Umbellularia californica	2011	umbe	33981.01428	4211186.874
0	37.79473333	-122.1721833	Umbellularia californica	2011	umbe	44478.31227	4195660.173
0	37.79255	-122.1784667	Umbellularia californica	2011	umbe	43911.08065	4195448.427
0	37.7938	-122.1709667	Umbellularia californica	2011	umbe	44579.78385	4195550.569
0	37.78508333	-122.1575	Umbellularia californica	2011	umbe	45713.08825	4194516.755
0	37.78288333	-122.1518167	Umbellularia californica	2011	umbe	46200.52946	4194244.734
0	37.78223333	-122.1525667	Umbellularia californica	2011	umbe	46130.43271	4194176.197
0	37.87113889	-122.2571611	Umbellularia californica	2011	umbe	37467.93073	4204565.052
0	37.87153889	-122.2568778	Umbellularia californica	2011	umbe	37495.38249	4204608.069
0	37.87161944	-122.2566194	Umbellularia californica	2011	umbe	37518.6378	4204615.73
0	37.87193333	-122.2556389	Umbellularia californica	2011	umbe	37606.9314	4204645.717
0	37.87225556	-122.2564611	Umbellularia californica	2011	umbe	37536.56519	4204685.594
0	37.87222778	-122.2558278	Umbellularia californica	2011	umbe	37592.14727	4204679.359
0	37.87180556	-122.25665	Umbellularia californica	2011	umbe	37517.11129	4204636.554
0	37.87198056	-122.2558028	Umbellularia californica	2011	umbe	37592.79767	4204651.777
0	37.88166389	-122.2011	Umbellularia californica	2011	umbe	42468.9549	4205456.679
0	37.84864444	-122.2009806	Umbellularia californica	2011	umbe	42274.56831	4201788.862
0	37.8487	-122.2016278	Umbellularia californica	2011	umbe	42217.91575	4201798.217
0	37.84922778	-122.2020417	Umbellularia californica	2011	umbe	42184.7392	4201858.869
0	37.83346667	-122.2028333	Umbellularia californica	2011	umbe	42017.23966	4200112.293
0	37.84966389	-122.2022278	Umbellularia californica	2011	umbe	42171.05589	4201908.221
0	37.83368889	-122.2028222	Umbellularia californica	2011	umbe	42019.59588	4200136.918
0	37.85127778	-122.2033806	Umbellularia californica	2011	umbe	42079.5492	4202093.136
0	37.85123333	-122.2056722	Umbellularia californica	2011	umbe	41877.46488	4202099.479
0	37.85153333	-122.2060861	Umbellularia californica	2011	umbe	41842.87786	4202134.836
0	37.85162778	-122.2061472	Umbellularia californica	2011	umbe	41838.08364	4202145.626
0	37.85164722	-122.2059806	Umbellularia californica	2011	umbe	41852.87582	4202146.965
0	37.851625	-122.2059583	Umbellularia californica	2011	umbe	41854.70167	4202144.388
0	37.85160278	-122.2036528	Umbellularia californica	2011	umbe	42057.59524	4202130.571
0	37.84839167	-122.202325	Umbellularia californica	2011	umbe	42154.60209	4201767.403
0	37.85099444	-122.2009806	Umbellularia californica	2011	umbe	42289.14584	4202049.86
0	37.87423056	-122.2608444	Umbellularia californica	2011	umbe	37163.05492	4204926.753
0	37.87423056	-122.2608444	Umbellularia californica	2011	umbe	37163.05492	4204926.753
0	37.87423889	-122.2607667	Umbellularia californica	2011	umbe	37169.94783	4204927.292
0	37.87426667	-122.2607528	Umbellularia californica	2011	umbe	37171.34599	4204930.308
0	37.87416111	-122.2608333	Umbellularia californica	2011	umbe	37163.59611	4204918.985
0	37.87426667	-122.2604611	Umbellularia californica	2011	umbe	37197.02687	4204928.856
0	37.87454167	-122.260025	Umbellularia californica	2011	umbe	37237.14688	4204957.229
0	37.87391667	-122.260925	Umbellularia californica	2011	umbe	37153.98819	4204892.292
0	37.951973	-122.318061	Umbellularia californica	2011	umbe	32619.61656	4213847.769
0	37.951973	-122.318061	Umbellularia californica	2011	umbe	32619.61656	4213847.769
0	37.952645	-122.31988	Umbellularia californica	2011	umbe	32463.91512	4213931.566
0	37.952041	-122.320128	Umbellularia californica	2011	umbe	32438.26235	4213865.73
0	37.95099	-122.321026	Umbellularia californica	2011	umbe	32352.59937	4213753.521
1	37.952588	-122.321508	Umbellularia californica	2011	umbe	32320.37572	4213933.436
0	37.831641	-122.185485	Umbellularia californica	2011	umbe	43534.08535	4199824.323
0	37.807719	-122.177798		2011	unk	44063.58501	4197129.846
0	37.807703	-122.177818	Umbellularia californica	2011	umbe	44061.72398	4197128.167
1	37.807703	-122.177818	Umbellularia californica	2011	umbe	44061.72398	4197128.167
0	37.807703	-122.177818	Umbellularia californica	2011	umbe	44061.72398	4197128.167
1	37.807703	-122.177818	Umbellularia californica	2011	umbe	44061.72398	4197128.167
1	37.807703	-122.177818	Umbellularia californica	2011	umbe	44061.72398	4197128.167
0	37.807703	-122.177818	Umbellularia californica	2011	umbe	44061.72398	4197128.167
0	37.808393	-122.177509		2011	unk	44093.20851	4197203.286
0	37.80938	-122.175959		2011	unk	44235.87393	4197305.319
0	37.810537	-122.179822		2011	unk	43902.63165	4197452.726
0	37.80933	-122.180738		2011	unk	43814.4694	4197323.161
0	37.810824	-122.178098		2011	unk	44056.30836	4197476.16
1	37.808195	-122.176789		2011	unk	44155.42993	4197177.772
0	37.811378	-122.176756		2011	unk	44177.97218	4197531.12
1	37.809221	-122.178974		2011	unk	43969.22969	4197302.417
0	37.889878	-122.256766		2011	unk	37620.29632	4206644.349
0	37.889691	-122.256546		2011	unk	37638.48712	4206622.486
0	37.86175833	-122.2393806		2011	unk	38974.71728	4203434.929
0	37.86643333	-122.230775		2011	unk	39761.64149	4203911.54
0	37.86070556	-122.2415306		2011	unk	38778.81974	4203328.661
0	37.86279722	-122.2451722		2011	unk	38471.2505	4203579.032
0	37.86279722	-122.2451722		2011	unk	38471.2505	4203579.032
0	37.903236	-122.277735		2011	unk	35858.78545	4208232.474
0	37.913063	-122.2823		2011	unk	35519.04556	4209346.732
0	37.904718	-122.274111		2011	unk	36187.04798	4208378.981
0	37.913017	-122.282221		2011	unk	35525.70673	4209341.228
0	37.81539722	-122.1995944		2011	unk	42190.54588	4198089.524
0	37.81589722	-122.2011667		2011	unk	42055.11404	4198152.786
0	37.81380278	-122.1915056		2011	unk	42893.3625	4197872.709
0	37.817	-122.1871917		2011	unk	43293.22009	4198206.634
0	37.81607778	-122.1818167		2011	unk	43761.08853	4198077.865
0	37.81381111	-122.1938944		2011	unk	42682.93931	4197885.362
0	37.851419	-122.237109		2011	unk	39110.14256	4202275.344
0	37.862397	-122.23252	Notholithocarpus densiflorus	2011	notho	39582.79985	4203471.885
0	37.863017	-122.234044	Notholithocarpus densiflorus	2011	notho	39452.48035	4203548.288
0	37.863028	-122.234303	Notholithocarpus densiflorus	2011	notho	39429.74376	4203550.792
0	37.862663	-122.235008	Notholithocarpus densiflorus	2011	notho	39365.38784	4203513.745
0	37.862949	-122.23465	Notholithocarpus densiflorus	2011	notho	39398.69657	4203543.736
0	37.900512	-122.281376	Umbellularia californica	2011	umbe	35521.18032	4207948.119
0	37.900578	-122.279002	Umbellularia californica	2011	umbe	35730.52685	4207943.588
0	37.900512	-122.281376	Umbellularia californica	2011	umbe	35521.18032	4207948.119
0	37.91292778	-122.284325	Umbellularia californica	2011	umbe	35340.00663	4209341.838
0	37.91275278	-122.2846472	Umbellularia californica	2011	umbe	35310.55057	4209324.013
0	37.91350556	-122.2857667	Umbellularia californica	2011	umbe	35216.79529	4209413.221
0	37.91407222	-122.285725	Umbellularia californica	2011	umbe	35224.04253	4209475.95
0	37.91428889	-122.2846306	Umbellularia californica	2011	umbe	35321.70838	4209494.54
0	37.883972	-122.267609	Umbellularia californica	2011	umbe	36628.75595	4206042.381
0	37.897335	-122.304711	Umbellularia californica	2011	umbe	33447.38257	4207712.138
0	37.897221	-122.304177	Notholithocarpus densiflorus	2011	notho	33493.65913	4207696.796
0	37.89573	-122.305971		2011	unk	33326.31749	4207540.2
0	37.891794	-122.250141	Umbellularia californica	2011	umbe	38215.4361	4206824.22
1	37.892192	-122.250623	Umbellularia californica	2011	umbe	38175.50677	4206870.818
1	37.892224	-122.247995	Umbellularia californica	2011	umbe	38407.01522	4206861.32
0	37.887477	-122.249117	Umbellularia californica	2011	umbe	38278.51253	4206339.667
1	37.889295	-122.247831	Umbellularia californica	2011	umbe	38403.09895	4206535.197
1	37.89037	-122.248388	Umbellularia californica	2011	umbe	38360.80747	4206657.357
0	37.886924	-122.246866	Umbellularia californica	2011	umbe	38473.18705	4206267.071
0	37.89083333	-122.2608333	Umbellularia californica	2011	umbe	37268.29355	4206770.691
1	37.89194444	-122.2602778	Umbellularia californica	2011	umbe	37324.16611	4206891.332
0	37.89277778	-122.2633333	Umbellularia californica	2011	umbe	37060.46563	4206999.099
0	37.89138889	-122.2616667	Umbellularia californica	2011	umbe	37198.42872	4206836.543
0	37.89277778	-122.2630556	Umbellularia californica	2011	umbe	37084.90781	4206997.716
0	37.89416667	-122.2638889	Umbellularia californica	2011	umbe	37020.2928	4207156.124
0	37.89171389	-122.2586389	Umbellularia californica	2011	umbe	37466.97028	4206857.57
1	37.89170278	-122.2599556	Umbellularia californica	2011	umbe	37351.00768	4206862.888
1	37.88685833	-122.2503306	Umbellularia californica	2011	umbe	38167.81085	4206276.982
0	37.88683056	-122.2658194	Umbellularia californica	2011	umbe	36804.25881	4206350.951
1	37.88665556	-122.26605	Umbellularia californica	2011	umbe	36782.86038	4206332.664
0	37.88657778	-122.2662917	Umbellularia californica	2011	umbe	36761.09599	4206325.229
0	37.88631111	-122.2660806	Umbellularia californica	2011	umbe	36778.00142	4206294.56
0	37.88717222	-122.2665444	Umbellularia californica	2011	umbe	36742.5897	4206392.51
0	37.89528333	-122.2739833	Umbellularia californica	2011	umbe	36138.8659	4207330.472
0	37.89511667	-122.2731	Umbellularia californica	2011	umbe	36215.55918	4207307.554
0	37.89576667	-122.2726167	Umbellularia californica	2011	umbe	36262.1886	4207377.336
0	37.89541667	-122.2725833	Umbellularia californica	2011	umbe	36262.92473	4207338.296
0	37.89475	-122.27245	Umbellularia californica	2011	umbe	36270.45992	4207263.587
0	37.89445	-122.2721333	Umbellularia californica	2011	umbe	36296.44558	4207228.687
0	37.89473333	-122.2727167	Umbellularia californica	2011	umbe	36246.88152	4207263.066
0	37.84583333	-122.2311111	Umbellularia californica	2011	umbe	39603.4986	4201625.285
0	37.84638889	-122.2291667	Umbellularia californica	2011	umbe	39778.2102	4201677.37
0	37.845	-122.23	Umbellularia californica	2011	umbe	39696.15733	4201527.236
0	37.84722222	-122.2330556	Umbellularia californica	2011	umbe	39440.91131	4201789.163
0	37.84694444	-122.2302778	Umbellularia californica	2011	umbe	39683.81988	4201744.567
0	37.84694444	-122.2297222	Umbellularia californica	2011	umbe	39732.75183	4201741.819
0	37.84722222	-122.2297222	Umbellularia californica	2011	umbe	39734.48444	4201772.67
0	37.84388889	-122.2269444	Umbellularia californica	2011	umbe	39958.34613	4201388.723
0	37.8577	-122.2321667	Umbellularia californica	2011	umbe	39584.58936	4202948.468
0	37.8577	-122.2321667	Umbellularia californica	2011	umbe	39584.58936	4202948.468
0	37.86326667	-122.2241667	Umbellularia californica	2011	umbe	40323.74378	4203527.163
0	37.86418333	-122.23135	Umbellularia californica	2011	umbe	39696.97019	4203664.492
1	37.86941667	-122.2270667	Umbellularia californica	2011	umbe	40106.75355	4204224.54
0	37.841215	-122.203663	Umbellularia californica	2011	umbe	41992.2309	4200976.926
0	37.840631	-122.201709	Umbellularia californica	2011	umbe	42160.70974	4200902.451
0	37.815816	-122.20234	Umbellularia californica	2011	umbe	41951.23478	4198149.536
0	37.815832	-122.202204	Umbellularia californica	2011	umbe	41963.31651	4198150.644
0	37.811101	-122.186976	Umbellularia californica	2011	umbe	43275.76025	4197550.422
0	37.810993	-122.186604	Umbellularia californica	2011	umbe	43307.87043	4197536.603
0	37.821583	-122.204553	Umbellularia californica	2011	umbe	41792.02771	4198800.922
0	37.823738	-122.206647	Umbellularia californica	2011	umbe	41620.92053	4199050.569
0	37.884147	-122.26901	Umbellularia californica	2011	umbe	36506.53046	4206068.801
0	37.884147	-122.26901	Umbellularia californica	2011	umbe	36506.53046	4206068.801
0	37.892037	-122.272753	Umbellularia californica	2011	umbe	36226.71149	4206963.777
0	37.894864	-122.27324	Umbellularia californica	2011	umbe	36201.64629	4207280.19
0	37.824185	-122.044693	Umbellularia californica	2011	umbe	55890.90805	4198315.397
0	37.89471	-122.273241	Umbellularia californica	2011	umbe	36200.58863	4207263.091
1	37.824185	-122.044791	Umbellularia californica	2011	umbe	55882.27509	4198315.864
1	37.824185	-122.044791	Umbellularia californica	2011	umbe	55882.27509	4198315.864
0	37.75768333	-122.1389833	Umbellularia californica	2011	umbe	47177.55559	4191383.622
0	37.75576667	-122.12915	Umbellularia californica	2011	umbe	48032.90051	4191123.058
0	37.73766667	-122.1211	Umbellularia californica	2011	umbe	48632.43538	4189073.911
0	37.823971	-122.045053	Umbellularia californica	2011	umbe	55857.90846	4198293.348
0	37.863964	-122.242359	Umbellularia californica	2011	umbe	38726.25609	4203694.666
0	37.863964	-122.242359	Umbellularia californica	2011	umbe	38726.25609	4203694.666
0	37.863828	-122.241512	Umbellularia californica	2011	umbe	38799.98426	4203675.361
0	37.864112	-122.244512	Umbellularia californica	2011	umbe	38537.60954	4203721.782
0	37.864112	-122.244512	Umbellularia californica	2011	umbe	38537.60954	4203721.782
0	37.863904	-122.242233	Umbellularia californica	2011	umbe	38736.97515	4203687.377
0	37.863673	-122.240916	Umbellularia californica	2011	umbe	38851.49315	4203655.191
0	37.863673	-122.240916	Umbellularia californica	2011	umbe	38851.49315	4203655.191
0	37.863673	-122.240916	Umbellularia californica	2011	umbe	38851.49315	4203655.191
0	37.863673	-122.240916	Umbellularia californica	2011	umbe	38851.49315	4203655.191
0	37.863673	-122.240916	Umbellularia californica	2011	umbe	38851.49315	4203655.191
1	37.863673	-122.240916	Umbellularia californica	2011	umbe	38851.49315	4203655.191
1	37.863673	-122.240916	Umbellularia californica	2011	umbe	38851.49315	4203655.191
0	37.863673	-122.240916	Umbellularia californica	2011	umbe	38851.49315	4203655.191
1	37.863673	-122.240916	Umbellularia californica	2011	umbe	38851.49315	4203655.191
1	37.863673	-122.240916	Umbellularia californica	2011	umbe	38851.49315	4203655.191
0	37.863673	-122.240916	Umbellularia californica	2011	umbe	38851.49315	4203655.191
1	37.863673	-122.240916	Umbellularia californica	2011	umbe	38851.49315	4203655.191
1	37.863673	-122.240916	Umbellularia californica	2011	umbe	38851.49315	4203655.191
0	37.92434167	-122.3030806	Umbellularia californica	2011	umbe	33761.95469	4210703.512
0	37.92455833	-122.3023778	Umbellularia californica	2011	umbe	33825.15963	4210724.049
0	37.924125	-122.3003083	Umbellularia californica	2011	umbe	34004.48897	4210665.536
0	37.92539444	-122.3000222	Umbellularia californica	2011	umbe	34037.6993	4210805.094
0	37.92225278	-122.2986528	Umbellularia californica	2011	umbe	34138.2868	4210449.29
0	37.92111667	-122.2969278	Umbellularia californica	2011	umbe	34282.86597	4210314.456
0	37.8774	-122.2576333		2011	unk	37465.64402	4205262.791
0	37.8717	-122.2582667		2011	unk	37374.11215	4204632.87
0	37.8717	-122.2415	Umbellularia californica	2011	umbe	38850.27572	4204549.601
0	37.8774	-122.2576333	Umbellularia californica	2011	umbe	37465.64402	4205262.791
0	37.8774	-122.2576333	Umbellularia californica	2011	umbe	37465.64402	4205262.791
1	37.8717	-122.2415	Umbellularia californica	2011	umbe	38850.27572	4204549.601
0	37.8774	-122.2576333		2011	unk	37465.64402	4205262.791
0	37.8717	-122.2581667		2011	unk	37382.91632	4204632.373
0	37.8774	-122.2576333		2011	unk	37465.64402	4205262.791
1	37.8717	-122.2415		2011	unk	38850.27572	4204549.601
0	37.863171	-122.241145	Umbellularia californica	2011	umbe	38828.19033	4203600.572
0	37.863171	-122.241145	Umbellularia californica	2011	umbe	38828.19033	4203600.572
0	37.863171	-122.241145	Umbellularia californica	2011	umbe	38828.19033	4203600.572
0	37.863171	-122.241145	Umbellularia californica	2011	umbe	38828.19033	4203600.572
0	37.863171	-122.241145	Umbellularia californica	2011	umbe	38828.19033	4203600.572
0	37.863171	-122.241145	Umbellularia californica	2011	umbe	38828.19033	4203600.572
0	37.863171	-122.241145	Umbellularia californica	2011	umbe	38828.19033	4203600.572
0	37.863171	-122.241145	Umbellularia californica	2011	umbe	38828.19033	4203600.572
0	37.862828	-122.241194		2011	unk	38821.7309	4203562.72
0	37.885372	-122.264269		2011	unk	36931.56461	4206181.232
0	37.885055	-122.261907		2011	unk	37137.4894	4206134.263
0	37.883396	-122.27056		2011	unk	36365.36343	4205993.119
0	37.89404	-122.270274	Umbellularia californica	2011	umbe	36457.51138	4207173.877
0	37.894834	-122.269646	Umbellularia californica	2011	umbe	36517.78082	4207258.931
0	37.897293	-122.272911	Umbellularia californica	2011	umbe	36245.89648	4207548.328
0	37.895467	-122.272288	Umbellularia californica	2011	umbe	36289.232	4207342.413
0	37.893853	-122.270732	Umbellularia californica	2011	umbe	36416.02357	4207155.391
0	37.884971	-122.261832	Umbellularia californica	2011	umbe	37143.5637	4206124.56
1	37.884971	-122.261832	Umbellularia californica	2011	umbe	37143.5637	4206124.56
0	37.884	-122.269376	Umbellularia californica	2011	umbe	36473.38788	4206054.299
0	37.894201	-122.258802	Umbellularia californica	2011	umbe	37468.23064	4207134.613
0	37.884971	-122.261832	Umbellularia californica	2011	umbe	37143.5637	4206124.56
0	37.89277778	-122.265	Umbellularia californica	2011	umbe	36913.76848	4207007.401
0	37.88694444	-122.2569444	Umbellularia californica	2011	umbe	37586.18283	4206319.42
0	37.89277778	-122.2638889	Umbellularia californica	2011	umbe	37011.56365	4207001.866
0	37.895112	-122.272205	Umbellularia californica	2011	umbe	36294.30232	4207302.571
0	37.895762	-122.27249	Umbellularia californica	2011	umbe	36273.31047	4207376.185
1	37.888858	-122.249893	Umbellularia californica	2011	umbe	38218.86241	4206496.902
1	37.884894	-122.261813	Umbellularia californica	2011	umbe	37144.75253	4206115.914
1	37.884124	-122.258818	Umbellularia californica	2011	umbe	37403.55628	4206015.488
1	37.883834	-122.258074	Umbellularia californica	2011	umbe	37467.22795	4205979.577
1	37.884272	-122.257679	Umbellularia californica	2011	umbe	37504.74761	4206026.259
0	37.885071	-122.260971	Umbellularia californica	2011	umbe	37219.98196	4206131.381
0	37.874833	-122.237977	Umbellularia californica	2011	umbe	39180.02858	4204880.104
0	37.874833	-122.237977	Umbellularia californica	2011	umbe	39180.02858	4204880.104
0	37.874833	-122.237977	Umbellularia californica	2011	umbe	39180.02858	4204880.104
0	37.874833	-122.237977	Umbellularia californica	2011	umbe	39180.02858	4204880.104
0	37.874833	-122.237977	Umbellularia californica	2011	umbe	39180.02858	4204880.104
0	37.874833	-122.237977	Umbellularia californica	2011	umbe	39180.02858	4204880.104
0	37.874833	-122.237977	Umbellularia californica	2011	umbe	39180.02858	4204880.104
0	37.874833	-122.237977	Umbellularia californica	2011	umbe	39180.02858	4204880.104
0	37.885273	-122.261997	Umbellularia californica	2011	umbe	37130.93645	4206158.923
0	37.885273	-122.261997	Umbellularia californica	2011	umbe	37130.93645	4206158.923
0	37.885273	-122.261997	Umbellularia californica	2011	umbe	37130.93645	4206158.923
0	37.885273	-122.261997	Umbellularia californica	2011	umbe	37130.93645	4206158.923
1	37.873722	-122.239549	Umbellularia californica	2011	umbe	39034.68696	4204764.502
0	37.872414	-122.241182	Umbellularia californica	2011	umbe	38882.73861	4204627.325
0	37.872618	-122.239724	Umbellularia californica	2011	umbe	39012.37683	4204642.754
0	37.872508	-122.238064	Umbellularia californica	2011	umbe	39157.83547	4204622.31
0	37.87244	-122.237646	Umbellularia californica	2011	umbe	39194.21116	4204612.687
0	37.871792	-122.237469	Umbellularia californica	2011	umbe	39205.74413	4204539.84
1	37.871156	-122.237511	Umbellularia californica	2011	umbe	39198.07132	4204469.411
0	40.10515	-123.7520911	Notholithocarpus densiflorus	2011	notho	-75698.65174	4461335.65
0	40.105159	-123.7520911	Umbellularia californica	2011	umbe	-75698.57546	4461336.65
0	40.105159	-123.7520911	Notholithocarpus densiflorus	2011	notho	-75698.57546	4461336.65
0	40.105159	-123.7520911	Umbellularia californica	2011	umbe	-75698.57546	4461336.65
0	40.105159	-123.7520911	Umbellularia californica	2011	umbe	-75698.57546	4461336.65
0	40.13187395	-123.9202321	Umbellularia californica	2011	umbe	-89814.07859	4465413.536
0	40.13187395	-123.9202321	Umbellularia californica	2011	umbe	-89814.07859	4465413.536
0	40.21927376	-123.9190631	Notholithocarpus densiflorus	2011	notho	-88953.96242	4475118.354
0	37.3641451	-122.1304772		2011	unk	45535.39665	4147636.571
0	37.3634022	-122.1373404		2011	unk	44922.51316	4147587.239
0	37.3632265	-122.1404478		2011	unk	44645.99203	4147582.76
0	37.3746643	-122.1441122		2011	unk	44390.56772	4148870.764
0	37.3797351	-122.1498377		2011	unk	43913.91655	4149461.668
0	37.3805549	-122.1497719		2011	unk	43924.72973	4149552.395
0	37.3815168	-122.1506647		2011	unk	43851.45142	4149663.552
1	37.3519233	-122.1147658		2011	unk	46854.39141	4146203.483
0	37.3516432	-122.1170837		2011	unk	46647.20115	4146183.539
0	37.3510422	-122.1174746		2011	unk	46608.91806	4146118.676
0	37.3511014	-122.1181627		2011	unk	46548.26905	4146128.566
0	37.3512408	-122.1175175		2011	unk	46606.31299	4146140.939
0	37.3520553	-122.1155433		2011	unk	46786.25613	4146221.886
0	37.347531	-122.1144109		2011	unk	46859.36898	4145713.979
0	37.3470165	-122.1143153		2011	unk	46864.74278	4145656.38
0	37.3467016	-122.1143868		2011	unk	46856.50451	4145621.752
0	37.3416244	-122.10686		2011	unk	47493.29229	4145021.688
0	37.3948506	-122.1624217		2011	unk	42890.73587	4151201.483
0	37.3814623	-122.1670774		2011	unk	42396.55485	4149737.23
0	37.3814108	-122.1674508		2011	unk	42363.14836	4149733.327
0	37.3644954	-122.1451537		2011	unk	44236.53607	4147746.467
0	37.3643221	-122.1448621		2011	unk	44261.33299	4147725.808
0	37.3640724	-122.1439841		2011	unk	44337.64757	4147693.824
0	37.3666507	-122.1452874		2011	unk	44237.76539	4147986.479
0	37.3663088	-122.1466239		2011	unk	44117.22035	4147954.983
0	37.3662867	-122.147313		2011	unk	44056.00299	4147955.868
0	37.3668187	-122.1485831		2011	unk	43946.64975	4148021.107
0	37.3551759	-122.1365425		2011	unk	44943.40837	4146669.783
0	37.3548751	-122.136083		2011	unk	44982.32336	4146634.155
1	37.3522171	-122.1411718		2011	unk	44515.05999	4146363.579
1	37.3544312	-122.1482036		2011	unk	43905.07211	4146643.529
0	37.3532587	-122.1518639		2011	unk	43573.44046	4146531.059
0	37.3549504	-122.1552436		2011	unk	43284.08865	4146735.334
0	37.3560791	-122.1567891		2011	unk	43153.93532	4146868.188
1	37.3557079	-122.161626		2011	unk	42722.86247	4146850.455
0	37.357117	-122.162628	Umbellularia californica	2011	umbe	42642.60945	4147011.818
0	37.357117	-122.162628	Umbellularia californica	2011	umbe	42642.60945	4147011.818
1	37.357117	-122.162628	Umbellularia californica	2011	umbe	42642.60945	4147011.818
1	37.357117	-122.162628	Umbellularia californica	2011	umbe	42642.60945	4147011.818
0	37.357117	-122.162628	Umbellularia californica	2011	umbe	42642.60945	4147011.818
1	37.357117	-122.162628	Umbellularia californica	2011	umbe	42642.60945	4147011.818
0	37.357117	-122.162628	Umbellularia californica	2011	umbe	42642.60945	4147011.818
0	37.357117	-122.162628	Umbellularia californica	2011	umbe	42642.60945	4147011.818
0	37.372895	-122.156138	Umbellularia californica	2011	umbe	43313.93219	4148732.584
0	37.373886	-122.164842	Umbellularia californica	2011	umbe	42548.49516	4148884.936
0	37.344578	-122.104191	Umbellularia californica	2011	umbe	47747.72461	4145336.879
0	37.362304	-122.168094	Umbellularia californica	2011	umbe	42189.6466	4147614.465
0	37.362076	-122.168301	Umbellularia californica	2011	umbe	42169.90665	4147590.15
0	37.362005	-122.167975	Umbellularia californica	2011	umbe	42198.37303	4147580.679
0	37.361899	-122.168213	Umbellularia californica	2011	umbe	42176.62867	4147570.065
0	37.361831	-122.168063	Umbellularia californica	2011	umbe	42189.51135	4147561.783
0	37.361726	-122.167815	Umbellularia californica	2011	umbe	42210.85604	4147548.915
0	37.362371	-122.168249	Umbellularia californica	2011	umbe	42176.31467	4147622.66
0	37.340253	-122.113334	Umbellularia californica	2011	umbe	46910.9765	4144900.523
0	37.340253	-122.113334	Umbellularia californica	2011	umbe	46910.9765	4144900.523
0	37.340253	-122.113334	Umbellularia californica	2011	umbe	46910.9765	4144900.523
1	37.3809	-122.1689	Umbellularia californica	2011	umbe	42231.59772	4149683.651
0	37.3805	-122.1693	Umbellularia californica	2011	umbe	42193.7076	4149641.174
0	37.375272	-122.153786	Umbellularia californica	2011	umbe	43536.85374	4148985.155
0	37.375044	-122.153899	Umbellularia californica	2011	umbe	43525.45195	4148960.382
0	37.374923	-122.153991	Umbellularia californica	2011	umbe	43516.56204	4148947.39
0	37.375275	-122.154256	Umbellularia californica	2011	umbe	43495.21515	4148987.769
1	37.375682	-122.153236	Umbellularia californica	2011	umbe	43588.09391	4149028.02
0	37.37523	-122.153022	Quercus agrifolia	2011	quercus	43604.31288	4148976.783
0	37.37523	-122.153022	Heteromeles arbutifolia	2011	other	43604.31288	4148976.783
0	37.367686	-122.167083	Umbellularia californica	2011	umbe	42312.07279	4148207.268
0	37.367271	-122.167396	Umbellularia californica	2011	umbe	42281.7984	4148162.701
0	37.367507	-122.167206	Umbellularia californica	2011	umbe	42300.07884	4148187.987
0	37.3666833	-122.16803	Umbellularia californica	2011	umbe	42222.01675	4148100.516
0	37.356137	-122.156017	Umbellularia californica	2011	umbe	43222.7375	4146870.87
1	37.355949	-122.15661	Umbellularia californica	2011	umbe	43169.02216	4146852.869
1	37.357395	-122.157492	Umbellularia californica	2011	umbe	43099.62406	4147017.743
0	37.35726	-122.158378	Umbellularia californica	2011	umbe	43020.25625	4147007.052
1	37.357644	-122.158828	Umbellularia californica	2011	umbe	42982.69867	4147051.884
1	37.355111	-122.155435	Umbellularia californica	2011	umbe	43268.09636	4146754.099
0	37.3643722	-122.1524861	Umbellularia californica	2011	umbe	43585.81273	4147768.328
0	37.3647639	-122.153	Umbellularia californica	2011	umbe	43542.63919	4147814.323
0	37.3649028	-122.1527528	Umbellularia californica	2011	umbe	43565.39623	4147828.55
0	37.3648583	-122.152475	Umbellularia californica	2011	umbe	43589.75103	4147822.26
0	37.3652222	-122.1529694	Umbellularia californica	2011	umbe	43548.13738	4147865.073
0	37.3659167	-122.1540194	Umbellularia californica	2011	umbe	43459.284	4147947.298
0	37.3660694	-122.1542222	Umbellularia californica	2011	umbe	43442.23567	4147965.241
0	37.3631889	-122.1514028	Umbellularia californica	2011	umbe	43674.65122	4147631.658
0	37.33496	-122.15188	Umbellularia californica	2011	umbe	43460.86524	4144498.907
0	37.3548	-122.1519	Umbellularia californica	2011	umbe	43579.60406	4146702.409
0	37.3543	-122.1521	Umbellularia californica	2011	umbe	43558.835	4146647.849
0	37.354	-122.1522	Umbellularia californica	2011	umbe	43548.1466	4146615.017
0	37.3539	-122.1523	Umbellularia californica	2011	umbe	43538.67333	4146604.396
0	37.3534	-122.152	Umbellularia californica	2011	umbe	43562.23262	4146547.411
0	37.3543	-122.1537	Umbellularia californica	2011	umbe	43416.98469	4146655.611
0	37.3554	-122.1552	Umbellularia californica	2011	umbe	43290.68741	4146785.054
0	37.387416	-122.152882	Umbellularia californica	2011	umbe	43690.81768	4150329.467
0	37.373047	-122.119962	Umbellularia californica	2011	umbe	46521.26676	4148574.456
0	37.37326	-122.120165	Umbellularia californica	2011	umbe	46504.56088	4148599.089
0	37.373297	-122.11901	Umbellularia californica	2011	umbe	46607.15509	4148597.631
0	37.370603	-122.119856	Umbellularia californica	2011	umbe	46515.9004	4148302.52
0	37.369257	-122.121494	Umbellularia californica	2011	umbe	46362.58286	4148160.934
0	37.369895	-122.121027		2011	unk	46407.83071	4148229.537
0	37.369708	-122.121273	Umbellularia californica	2011	umbe	46384.89635	4148209.955
0	37.375687	-122.119644	Umbellularia californica	2011	umbe	46565.39757	4148866.114
0	37.355301	-122.132987	Umbellularia californica	2011	umbe	45259.37756	4146666.49
0	37.351258	-122.133214	Umbellularia californica	2011	umbe	45214.77997	4146218.58
0	37.349953	-122.12568		2011	unk	45874.85115	4146037.271
1	37.35044	-122.125935	Umbellularia californica	2011	umbe	45855.18617	4146092.587
0	37.359919	-122.154952	Umbellularia californica	2011	umbe	43340.14771	4147285.726
1	37.360808	-122.154939		2011	unk	43346.70526	4147384.394
0	37.362359	-122.155559		2011	unk	43301.17446	4147559.656
1	37.356778	-122.15751		2011	unk	43094.27536	4146949.307
0	37.356894	-122.157711		2011	unk	43077.16157	4146963.166
0	37.351599	-122.137297	Umbellularia californica	2011	umbe	44854.84928	4146276.188
1	37.350346	-122.149019	Umbellularia californica	2011	umbe	43807.97724	4146193.785
1	37.358261	-122.158587		2011	unk	43007.81779	4147119.237
0	37.357752	-122.159578		2011	unk	42916.86634	4147067.521
0	37.356837	-122.161596		2011	unk	42732.39532	4146975.707
1	37.363145	-122.170311		2011	unk	41998.24393	4147718.655
0	37.363145	-122.170311		2011	unk	41998.24393	4147718.655
0	37.363145	-122.170311		2011	unk	41998.24393	4147718.655
1	37.362533	-122.169427		2011	unk	42072.87578	4147646.384
0	37.362386	-122.171692		2011	unk	41871.1929	4147641.085
0	37.373531	-122.166411		2011	unk	42407.2651	4148853.142
0	37.370561	-122.157752		2011	unk	43156.67395	4148481.209
0	37.373358	-122.163974		2011	unk	42622.21224	4148822.076
0	37.3707922	-122.1571892		2011	unk	43207.96566	4148504.153
1	37.3710726	-122.1573216		2011	unk	43197.93615	4148535.937
1	37.3712751	-122.1579179		2011	unk	43146.31431	4148561.322
1	37.3716579	-122.1585122	Umbellularia californica	2011	umbe	43095.9673	4148606.722
1	37.3728993	-122.1594357		2011	unk	43021.6683	4148749.076
1	37.372574	-122.1605913		2011	unk	42917.26159	4148718.563
0	37.3552	-122.1614	Umbellularia californica	2011	umbe	42739.80694	4146792.95
0	37.3541	-122.1599	Umbellularia californica	2011	umbe	42866.09685	4146663.498
0	37.3555	-122.1547	Umbellularia californica	2011	umbe	43335.62292	4146793.734
0	37.3575	-122.1635	Umbellularia californica	2011	umbe	42567.63599	4147058.593
0	37.35756	-122.163683	Umbellularia californica	2011	umbe	42551.77788	4147066.146
0	37.35716	-122.1635	Umbellularia californica	2011	umbe	42565.56548	4147020.833
0	37.3571	-122.163416	Umbellularia californica	2011	umbe	42572.64699	4147013.761
0	37.35695	-122.16316	Umbellularia californica	2011	umbe	42594.42889	4146995.857
0	37.35485	-122.1647	Umbellularia californica	2011	umbe	42445.11119	4146770.119
0	37.35675	-122.163416	Umbellularia californica	2011	umbe	42570.51564	4146974.89
1	37.356416	-122.16393	Umbellularia californica	2011	umbe	42522.91342	4146940.295
0	38.034472	-122.577682	Umbellularia californica	2011	umbe	10336.42029	4224351.06
1	38.032854	-122.571612		2011	unk	10858.90722	4224139.262
1	38.033144	-122.574818	Umbellularia californica	2011	umbe	10579.17022	4224188.41
0	38.034246	-122.575319	Umbellularia californica	2011	umbe	10542.51561	4224313.467
0	38.034827	-122.576126	Umbellularia californica	2011	umbe	10475.49735	4224382.269
1	38.031039	-122.572237	Umbellularia californica	2011	umbe	10791.87711	4223940.953
1	38.030955	-122.570048	Umbellularia californica	2011	umbe	10983.64332	4223920.065
1	38.032913	-122.573092	Umbellularia californica	2011	umbe	10729.27074	4224153.632
0	37.985	-122.527778	Umbellularia californica	2011	umbe	14393.27585	4218593.209
0	37.984167	-122.516667	Umbellularia californica	2011	umbe	15364.59322	4218442.557
0	37.984722	-122.523333	Umbellularia californica	2011	umbe	14782.2183	4218539.062
0	37.983333	-122.502222	Umbellularia californica	2011	umbe	16629.03335	4218274.531
0	37.993889	-122.502222	Umbellularia californica	2011	umbe	16698.55436	4219447.052
1	37.997222	-122.515	Umbellularia californica	2011	umbe	15597.33252	4219883.955
0	37.997778	-122.501944	Umbellularia californica	2011	umbe	16748.60688	4219877.579
0	37.993889	-122.502222	Umbellularia californica	2011	umbe	16698.55436	4219447.052
0	37.944045	-122.517445		2011	unk	15031.36264	4213989.994
0	37.869013	-122.432881	Umbellularia californica	2011	umbe	21982.81701	4205217.543
1	37.87117	-122.430734	Umbellularia californica	2011	umbe	22185.84509	4205446.092
0	38.087148	-122.594107	Umbellularia californica	2011	umbe	9246.70236	4230289.297
0	38.087148	-122.594107	Umbellularia californica	2011	umbe	9246.70236	4230289.297
0	38.087148	-122.594107	Umbellularia californica	2011	umbe	9246.70236	4230289.297
0	38.087148	-122.594107	Umbellularia californica	2011	umbe	9246.70236	4230289.297
0	38.087148	-122.594107	Umbellularia californica	2011	umbe	9246.70236	4230289.297
0	38.087148	-122.594107	Umbellularia californica	2011	umbe	9246.70236	4230289.297
0	38.087148	-122.594107	Umbellularia californica	2011	umbe	9246.70236	4230289.297
0	38.087148	-122.594107	Umbellularia californica	2011	umbe	9246.70236	4230289.297
1	38.039049	-122.551136	Umbellularia californica	2011	umbe	12699.0978	4224719.468
1	38.039141	-122.55149	Umbellularia californica	2011	umbe	12668.61089	4224731.55
1	37.98594	-122.521041	Umbellularia californica	2011	umbe	14991.76772	4218662.364
1	37.936157	-122.529755	Umbellularia californica	2011	umbe	13896.37157	4213178.205
0	37.972686	-122.541698	Umbellularia californica	2011	umbe	13087.83242	4217298.379
1	38.033056	-122.583889		2011	unk	9781.618385	4224226.602
1	38.038889	-122.603611		2011	unk	8088.035055	4224979.099
1	38.045833	-122.620278	Umbellularia californica	2011	umbe	6670.574929	4225839.11
1	38.028333	-122.575		2011	unk	10531.04221	4223654.967
0	38.036389	-122.576944	Umbellularia californica	2011	umbe	10414.07005	4224560.099
1	38.028056	-122.573889		2011	unk	10626.80919	4223618.329
1	38.028333	-122.576944		2011	unk	10360.23453	4223665.241
1	38.024722	-122.568611		2011	unk	11068.31299	4223220.122
0	38.0475	-122.542222	Umbellularia californica	2011	umbe	13538.32725	4225611.328
1	38.046111	-122.54		2011	unk	13724.28373	4225445.371
1	38.05	-122.553056	Umbellularia californica	2011	umbe	12603.3108	4225945.994
0	38.050278	-122.5525	Umbellularia californica	2011	umbe	12653.99849	4225973.947
1	38.050278	-122.554167		2011	unk	12507.57471	4225982.722
0	38.050833	-122.548611	Umbellularia californica	2011	umbe	12999.2864	4226015.135
1	38.048333	-122.548611	Umbellularia californica	2011	umbe	12982.65897	4225737.439
0	38.047778	-122.546389		2011	unk	13174.14721	4225664.106
1	37.986667	-122.513889	Umbellularia californica	2011	umbe	15625.32051	4218705.735
1	37.986667	-122.513889	Umbellularia californica	2011	umbe	15625.32051	4218705.735
0	37.986667	-122.513889	Notholithocarpus densiflorus	2011	notho	15625.32051	4218705.735
0	38.1186111	-122.6147222	Umbellularia californica	2011	umbe	7648.840167	4233893.823
0	38.1211111	-122.6016667		2011	unk	8811.35224	4234102.077
0	38.205	-122.6841667	Umbellularia californica	2011	umbe	2144.773643	4243862.452
0	38.1675	-122.6575	Umbellularia californica	2011	umbe	4227.07776	4239553.267
1	38.1319444	-122.6816667	Umbellularia californica	2011	umbe	1864.943882	4235733.617
0	38.2358333	-122.7177778	Umbellularia californica	2011	umbe	-589.206716	4247469.514
0	38.1433333	-122.6483333	Umbellularia californica	2011	umbe	4866.949483	4236819.583
0	38.1791667	-122.6522222	Umbellularia californica	2011	umbe	4769.206876	4240820.919
1	38.0177778	-122.6655556	Umbellularia californica	2011	umbe	2502.6649	4222964.841
1	38.1216667	-122.8558333	Umbellularia californica	2011	umbe	-13489.7067	4235545.189
1	38.1336111	-122.7913889	Umbellularia californica	2011	umbe	-7750.96949	4236515.978
1	38.1352778	-122.8408333	Umbellularia californica	2011	umbe	-12077.78591	4236974.028
1	38.085217	-122.753493	Umbellularia californica	2011	umbe	-4760.149127	4230932.414
1	38.078061	-122.75532	Umbellularia californica	2011	umbe	-4969.981593	4230147.44
1	38.111667	-122.538056	Umbellularia californica	2011	umbe	14330.50632	4232716.995
1	38.101389	-122.536111	Umbellularia californica	2011	umbe	14432.91312	4231565.122
1	38.100556	-122.534722	Umbellularia californica	2011	umbe	14549.29894	4231465.303
0	38.099722	-122.535278	Umbellularia californica	2011	umbe	14494.9562	4231375.583
1	38.0975	-122.535278	Umbellularia californica	2011	umbe	14480.19742	4231128.767
1	38.095556	-122.536111	Umbellularia californica	2011	umbe	14394.16393	4230917.204
0	38.096111	-122.538056	Umbellularia californica	2011	umbe	14227.11719	4230989.065
1	37.989492	-122.5625	Umbellularia californica	2011	umbe	11370.59174	4219274.576
1	37.989581	-122.562754	Umbellularia californica	2011	umbe	11348.85514	4219285.8
0	37.989942	-122.561314	Umbellularia californica	2011	umbe	11477.84937	4219318.312
0	37.989935	-122.56279	Umbellularia californica	2011	umbe	11348.04773	4219325.312
0	37.989935	-122.56279	Umbellularia californica	2011	umbe	11348.04773	4219325.312
0	37.989322	-122.562433	Umbellularia californica	2011	umbe	11375.34975	4219255.339
1	37.962973	-122.527832	Umbellularia californica	2011	umbe	14242.82702	4216146.789
1	37.962973	-122.527832		2011	unk	14242.82702	4216146.789
1	37.960729	-122.524923	Umbellularia californica	2011	umbe	14483.81649	4215882.305
1	37.984444	-122.519167	Umbellularia californica	2011	umbe	15146.63475	4218486.393
1	37.983611	-122.519444	Umbellularia californica	2011	umbe	15116.77946	4218395.314
0	37.984167	-122.519444	Umbellularia californica	2011	umbe	15120.45241	4218457.073
0	37.988056	-122.505556	Umbellularia californica	2011	umbe	16367.04433	4218816.527
1	37.9025	-122.552222	Umbellularia californica	2011	umbe	11696.51119	4209557.521
1	37.9025	-122.552222	Umbellularia californica	2011	umbe	11696.51119	4209557.521
1	37.90092	-122.548048	Umbellularia californica	2011	umbe	12053.41285	4209360.086
0	37.90124722	-122.548975	Umbellularia californica	2011	umbe	11973.99053	4209401.303
0	37.901575	-122.549985	Umbellularia californica	2011	umbe	11887.26731	4209443.018
0	37.901859	-122.549985	Umbellularia californica	2011	umbe	11889.15042	4209474.564
0	37.90268694	-122.5514918	Umbellularia californica	2011	umbe	11762.01966	4209574.448
0	37.902664	-122.5522918	Umbellularia californica	2011	umbe	11691.45565	4209576.105
0	37.90109183	-122.548563	Umbellularia californica	2011	umbe	12009.22324	4209381.878
1	37.960415	-122.53142	Umbellularia californica	2011	umbe	13910.36688	4215881.444
1	37.959844	-122.530474	Umbellularia californica	2011	umbe	13989.78469	4215813.063
0	37.981	-122.6064111	Umbellularia californica	2011	umbe	7453.319938	4218563.606
1	37.95	-122.6	Umbellularia californica	2011	umbe	7809.282067	4215086.071
1	37.95	-122.6	Umbellularia californica	2011	umbe	7809.282067	4215086.071
1	37.93333333	-122.5833333	Umbellularia californica	2011	umbe	9163.990947	4213146.472
1	37.94856	-122.598337	Umbellularia californica	2011	umbe	7945.91631	4214917.296
1	38	-122.6166667	Umbellularia californica	2011	umbe	6679.385352	4220728.677
1	38.00039	-122.619463	Umbellularia californica	2011	umbe	6436.215583	4220786.885
1	38	-122.6188333	Umbellularia californica	2011	umbe	6488.941705	4220740.211
1	37.9835	-122.5281667	Umbellularia californica	2011	umbe	14349.17853	4218428.628
1	37.98216667	-122.5278333	Umbellularia californica	2011	umbe	14369.66859	4218278.779
0	37.98183333	-122.5276667	Umbellularia californica	2011	umbe	14382.11047	4218240.88
1	37.98166667	-122.527	Umbellularia californica	2011	umbe	14439.62328	4218218.877
0	37.98116667	-122.527	Umbellularia californica	2011	umbe	14436.3159	4218163.339
1	37.983	-122.5275	Umbellularia californica	2011	umbe	14404.48461	4218369.598
1	37.98116667	-122.527	Umbellularia californica	2011	umbe	14436.3159	4218163.339
0	37.883588	-122.546685	Umbellularia californica	2011	umbe	12058.55024	4207427.722
0	37.848594	-122.485324	Umbellularia californica	2011	umbe	17231.43402	4203220.403
0	37.972936	-122.553393	Umbellularia californica	2011	umbe	12061.14982	4217387.605
1	37.987341	-122.540783	Umbellularia californica	2011	umbe	13265.46858	4218921.425
1	37.979136	-122.545945	Umbellularia californica	2011	umbe	12757.20083	4218037.136
1	37.87479	-122.543374	Umbellularia californica	2011	umbe	12291.80549	4206433.08
1	37.933897	-122.551202	Umbellularia californica	2011	umbe	11994.59262	4213039.689
1	37.933225	-122.547821	Umbellularia californica	2011	umbe	12287.58591	4212947.278
0	38.025094	-122.568774	Umbellularia californica	2011	umbe	11056.47235	4223262.304
0	37.902692	-122.557847	Notholithocarpus densiflorus	2011	notho	11202.70099	4209608.429
1	37.903418	-122.558144	Umbellularia californica	2011	umbe	11181.38168	4209690.635
0	37.941938	-122.544598		2011	unk	12628.90116	4213898.175
1	37.858596	-122.493457	Umbellularia californica	2011	umbe	16580.66623	4204373.622
0	37.902585	-122.558183	Umbellularia californica	2011	umbe	11172.41739	4209598.312
1	37.952181	-122.570035	Umbellularia californica	2011	umbe	10459.50223	4215169.831
1	37.955979	-122.570035	Umbellularia californica	2011	umbe	10484.80695	4215591.71
0	38.03198	-122.583932	Umbellularia californica	2011	umbe	9770.640808	4224107.308
0	38.014083	-122.546579	Umbellularia californica	2011	umbe	12933.52912	4221922.321
0	38.04122	-122.528059	Umbellularia californica	2011	umbe	14740.78963	4224839.456
0	37.988425	-122.533294	Umbellularia californica	2011	umbe	13931.02239	4219002.549
0	37.891281	-122.569503		2011	unk	10100.87271	4208402.297
0	38.322423	-122.235555	Umbellularia californica	2011	umbe	42203.9518	4254579.662
0	38.325488	-122.284581	Umbellularia californica	2011	umbe	37933.851	4255164.975
0	38.333063	-122.235344	Umbellularia californica	2011	umbe	42289.56679	4255760.351
0	38.33361	-122.235686	Umbellularia californica	2011	umbe	42263.1005	4255822.805
0	38.344656	-122.251457	Umbellularia californica	2011	umbe	40953.35785	4257128.18
0	38.297647	-122.245784	Umbellularia californica	2011	umbe	41152.32749	4251878.795
0	38.311235	-122.277958	Umbellularia californica	2011	umbe	38422.64798	4253548.714
0	38.313161	-122.27855	Umbellularia californica	2011	umbe	38383.09401	4253765.597
0	38.5612	-122.45223	Umbellularia californica	2011	umbe	24818.85289	4282201.487
0	38.57343	-122.461616	Umbellularia californica	2011	umbe	24081.25415	4283608.686
0	38.584783	-122.478816		2011	unk	22656.87872	4284959.291
0	38.6138	-122.50195		2011	unk	20833.64145	4288303.329
0	38.580483	-122.4797		2011	unk	22551.23211	4284486.274
1	38.301994	-122.1933194	Umbellularia californica	2011	umbe	45771.52834	4252101.61
0	38.300316	-122.201775	Umbellularia californica	2011	umbe	45020.9802	4251956.968
0	38.285661	-122.222908	Umbellularia californica	2011	umbe	43079.17044	4250433.888
0	38.289194	-122.227094	Umbellularia californica	2011	umbe	42734.96892	4250847.044
0	38.28412	-122.2218	Umbellularia californica	2011	umbe	43166.47387	4250257.244
0	38.29391	-122.220061	Umbellularia californica	2011	umbe	43380.2639	4251335.95
1	38.37153	-122.38556	Umbellularia californica	2011	umbe	29397.75345	4260790.61
1	38.4081	-122.4678	Umbellularia californica	2011	umbe	22447.93366	4265276.723
0	38.41826	-122.42565	Umbellularia californica	2011	umbe	26198.3942	4266187.005
0	38.421833	-122.4173	Umbellularia californica	2011	umbe	26951.45259	4266540.837
0	38.469616	-122.4762	Umbellularia californica	2011	umbe	22121.03096	4272153.36
0	38.46425	-122.48493	Umbellularia californica	2011	umbe	21323.08014	4271602.829
1	38.4891	-122.5098	Umbellularia californica	2011	umbe	19316.80117	4274493.128
0	38.50656	-122.49015	Umbellularia californica	2011	umbe	21148.3204	4276329.719
0	38.301865	-122.290956	Umbellularia californica	2011	umbe	37225.43254	4252573.232
1	38.300991	-122.300947	Notholithocarpus densiflorus	2011	notho	36345.40659	4252526.399
0	38.30023	-122.294768	Umbellularia californica	2011	umbe	36881.36383	4252410.793
0	38.304968	-122.339407	Umbellularia californica	2011	umbe	33004.78577	4253162.414
0	38.303875	-122.329727	Umbellularia californica	2011	umbe	33844.96515	4252991.979
0	38.300683	-122.290433	Umbellularia californica	2011	umbe	37263.67228	4252439.322
0	38.303241	-122.323036	Umbellularia californica	2011	umbe	34426.5058	4252887.72
0	38.301209	-122.293576	Umbellularia californica	2011	umbe	36991.93805	4252513.537
0	38.302088	-122.340373	Umbellularia californica	2011	umbe	32901.7063	4252847.431
0	38.305009	-122.33944	Umbellularia californica	2011	umbe	33002.16141	4253167.135
0	38.324579	-122.285522	Umbellularia californica	2011	umbe	37845.72696	4255068.737
0	38.324579	-122.285522	Umbellularia californica	2011	umbe	37845.72696	4255068.737
0	38.324579	-122.285522	Umbellularia californica	2011	umbe	37845.72696	4255068.737
0	38.417683	-122.3532	Umbellularia californica	2011	umbe	32525.67746	4265751.761
0	38.417683	-122.3532	Umbellularia californica	2011	umbe	32525.67746	4265751.761
0	38.32382	-122.333402	Umbellularia californica	2011	umbe	33651.53995	4255225.869
0	38.302652	-122.323078		2011	unk	34419.05174	4252822.512
1	38.302652	-122.323078		2011	unk	34419.05174	4252822.512
1	38.30219	-122.323614		2011	unk	34369.17563	4252773.908
1	38.302652	-122.323078		2011	unk	34419.05174	4252822.512
1	38.302651	-122.322811		2011	unk	34442.41397	4252821.052
0	38.30206	-122.30418	Umbellularia californica	2011	umbe	36069.27257	4252661.409
0	38.340598	-122.392443	Umbellularia californica	2011	umbe	28594.63929	4257390.17
1	38.340206	-122.391567	Umbellularia californica	2011	umbe	28668.72187	4257342.143
0	38.32445	-122.35031	Umbellularia californica	2011	umbe	32176.18863	4255381.625
0	38.332455	-122.368645	Umbellularia californica	2011	umbe	30623.73739	4256364.081
1	38.350725	-122.399315	Umbellularia californica	2011	umbe	28059.44071	4258550.226
1	38.332737	-122.370384	Umbellularia californica	2011	umbe	30473.42142	4256404.273
1	38.335757	-122.381606	Umbellularia californica	2011	umbe	29511.22851	4256797.015
1	38.33858	-122.388604	Umbellularia californica	2011	umbe	28917.35611	4257146.368
0	38.3455016	-122.228783	Umbellularia californica	2011	umbe	42941.96961	4257109.25
0	38.314183	-122.22475	Umbellularia californica	2011	umbe	43097.45718	4253610.822
0	38.316083	-122.22373	Umbellularia californica	2011	umbe	43198.67465	4253816.786
1	38.327385	-122.28553	Umbellularia californica	2011	umbe	37862.90716	4255380.433
0	38.349283	-122.23646	Umbellularia californica	2011	umbe	42294.35874	4257567.387
1	38.295816	-122.3838	Umbellularia californica	2011	umbe	29060.0673	4252371.916
0	38.296883	-122.38263	Umbellularia californica	2011	umbe	29169.40169	4252484.448
0	38.3276	-122.3414	Umbellularia californica	2011	umbe	32976.07564	4255686.257
0	38.304816	-122.315266	Umbellularia californica	2011	umbe	35116.64134	4253023.408
0	38.26583	-122.3255	Umbellularia californica	2011	umbe	33970.86679	4248744.966
1	38.3172	-122.345	Umbellularia californica	2011	umbe	32594.08326	4254549.397
1	38.3105	-122.304	Umbellularia californica	2011	umbe	36138.97328	4253597.92
0	38.31361	-122.342	Umbellularia californica	2011	umbe	32833.48456	4254135.432
0	38.3011	-122.278	Umbellularia californica	2011	umbe	38354.51207	4252423.257
0	38.344	-122.2505	Umbellularia californica	2011	umbe	41032.91246	4257050.547
0	38.35583	-122.28972	Umbellularia californica	2011	umbe	37677.77863	4258560.801
1	38.298987	-122.324679	Umbellularia californica	2011	umbe	34255.41226	4252423.537
0	38.306178	-122.340524	Umbellularia californica	2011	umbe	32914.81266	4253302.473
1	38.315269	-122.311736	Umbellularia californica	2011	umbe	35492.50424	4254166.599
0	38.312801	-122.348542	Umbellularia californica	2011	umbe	32255.77564	4254078.785
0	38.303653	-122.349182	Umbellularia californica	2011	umbe	32140.79178	4253065.965
0	38.315269	-122.311736	Umbellularia californica	2011	umbe	35492.50424	4254166.599
0	38.302474	-122.349012	Umbellularia californica	2011	umbe	32148.07083	4252934.15
0	38.304706	-122.338915	Umbellularia californica	2011	umbe	33046.16029	4253130.819
0	38.4565361	-122.447183	Umbellularia californica	2011	umbe	24568.7461	4270549.79
0	38.4565361	-122.447183		2011	unk	24568.7461	4270549.79
1	38.288364	-122.2279		2011	unk	42659.18823	4250758.86
0	38.286922	-122.225871		2011	unk	42827.72494	4250588.636
0	38.286854	-122.225313		2011	unk	42876.14372	4250578.315
0	38.391349	-122.240576		2011	unk	42200.37104	4262259.969
0	38.391168	-122.242383		2011	unk	42041.27095	4262248.865
1	38.365866	-122.406917	Umbellularia californica	2011	umbe	27493.29878	4260271.002
1	38.378349	-122.428245	Umbellularia californica	2011	umbe	25709.97131	4261767.326
1	38.315844	-122.343147	Umbellularia californica	2011	umbe	32747.49829	4254389.382
1	38.337246	-122.374303	Umbellularia californica	2011	umbe	30159.77961	4256925.093
1	38.347571	-122.377779	Umbellularia californica	2011	umbe	29922.66334	4258089.657
1	38.354916	-122.387907	Umbellularia californica	2011	umbe	29084.50653	4258957.273
0	38.386971	-122.428934	Umbellularia californica	2011	umbe	25706.24256	4262728.559
0	38.387909	-122.432736	Umbellularia californica	2011	umbe	25380.00947	4262852.369
1	38.402165	-122.447652	Umbellularia californica	2011	umbe	24169.79712	4264512.969
1	38.40516	-122.441056	Umbellularia californica	2011	umbe	24766.01141	4264811.503
0	38.400403	-122.424557	Umbellularia californica	2011	umbe	26176.88805	4264197.926
0	38.394325	-122.418191	Umbellularia californica	2011	umbe	26693.55137	4263490.019
1	38.382101	-122.400845	Umbellularia californica	2011	umbe	28130.1266	4262043.088
1	38.394047	-122.447058	Umbellularia californica	2011	umbe	24168.30899	4263608.19
1	38.379497	-122.395984	Umbellularia californica	2011	umbe	28538.15558	4261728.919
1	38.360225	-122.368717	Umbellularia californica	2011	umbe	30797.27972	4259448.896
0	38.528805	-122.368083	Umbellularia californica	2011	umbe	31946.70264	4278170.078
0	38.528805	-122.368083		2011	unk	31946.70264	4278170.078
0	38.527361	-122.36725		2011	unk	32009.99477	4278005.437
0	38.528805	-122.368083		2011	unk	31946.70264	4278170.078
0	38.507833	-122.35627		2011	unk	32841.36097	4275780.433
0	38.518305	-122.358638		2011	unk	32702.63361	4276955.637
0	38.386473	-122.281635	Umbellularia californica	2011	umbe	38580.18069	4261923.653
0	38.385219	-122.281176	Umbellularia californica	2011	umbe	38612.31182	4261782.071
1	38.404674	-122.294541	Umbellularia californica	2011	umbe	37568.29461	4264010.053
0	38.425225	-122.300304	Umbellularia californica	2011	umbe	37196.19922	4266321.635
0	38.434779	-122.297813	Umbellularia californica	2011	umbe	37475.00786	4267370.238
0	38.434706	-122.298063	Umbellularia californica	2011	umbe	37452.70008	4267363.389
0	38.438973	-122.292963	Umbellularia californica	2011	umbe	37925.53903	4267811.646
0	38.439747	-122.287786	Umbellularia californica	2011	umbe	38382.72856	4267871.578
0	38.452308	-122.298935	Umbellularia californica	2011	umbe	37489.26123	4269322.809
0	38.448799	-122.293854	Umbellularia californica	2011	umbe	37910.57966	4268907.487
0	38.448799	-122.29385		2011	unk	37910.92903	4268907.466
0	38.444942	-122.289474	Umbellularia californica	2011	umbe	38268.48615	4268457.063
0	38.441013	-122.287681	Umbellularia californica	2011	umbe	38399.99165	4268011.662
0	38.440951	-122.284079	Umbellularia californica	2011	umbe	38714.24324	4267986.677
0	38.448818	-122.279374	Umbellularia californica	2011	umbe	39175.44361	4268836.825
0	38.4434	-122.280276		2011	unk	39062.07839	4268239.587
0	38.44415	-122.277131		2011	unk	39341.57935	4268307.107
0	38.444168	-122.276948	Umbellularia californica	2011	umbe	39357.67911	4268308.188
0	38.442086	-122.274572	Umbellularia californica	2011	umbe	39551.94801	4268065.029
0	38.438537	-122.271286	Umbellularia californica	2011	umbe	39816.37601	4267654.38
0	38.448299	-122.273997	Notholithocarpus densiflorus	2011	notho	39641.78227	4268752.209
0	38.450748	-122.279983	Umbellularia californica	2011	umbe	39134.56996	4269054.243
0	38.447195	-122.2745	Umbellularia californica	2011	umbe	39590.80917	4268632.113
0	38.448932	-122.277257	Umbellularia californica	2011	umbe	39361.07772	4268838.864
0	38.32308	-122.23645		2011	unk	42129.78971	4254657.082
0	38.32324	-122.23555		2011	unk	42209.54533	4254670.378
0	37.789746	-122.457598		2011	unk	19290.51664	4196540.393
0	37.789746	-122.457598		2011	unk	19290.51664	4196540.393
0	37.79805556	-122.4511111		2011	unk	19916.29555	4197429.91
0	37.79805556	-122.4511111		2011	unk	19916.29555	4197429.91
0	37.79861111	-122.4738889		2011	unk	17912.34238	4197609.282
0	37.79861111	-122.4738889		2011	unk	17912.34238	4197609.282
0	37.79388889	-122.4616667		2011	unk	18958.83418	4197021.567
0	37.789496	-122.45681	Umbellularia californica	2011	umbe	19358.35118	4196508.559
0	37.79566944	-122.4666222		2011	unk	18533.64337	4197244.946
0	37.789367	-122.456548		2011	unk	19380.60712	4196492.878
0	37.789367	-122.4564611		2011	unk	19388.26715	4196492.43
0	37.789367	-122.4564611		2011	unk	19388.26715	4196492.43
0	37.80141667	-122.4706333		2011	unk	18217.57435	4197904.06
0	37.80141667	-122.4706333		2011	unk	18217.57435	4197904.06
0	37.79719167	-122.4725806		2011	unk	18018.39442	4197444.846
0	37.79719167	-122.4725528		2011	unk	18020.84468	4197444.702
0	37.80141667	-122.4707833		2011	unk	18204.35429	4197904.836
0	37.80141667	-122.4707833		2011	unk	18204.35429	4197904.836
0	37.798578	-122.471365		2011	unk	18134.57586	4197592.542
0	37.798578	-122.471365		2011	unk	18134.57586	4197592.542
0	37.789463	-122.457418		2011	unk	19304.54288	4196508.031
0	37.80213611	-122.4579611		2011	unk	19339.09961	4197918.486
0	37.80141667	-122.4707833		2011	unk	18204.35429	4197904.836
0	37.80141667	-122.4707833		2011	unk	18204.35429	4197904.836
0	37.797924	-122.457138		2011	unk	19384.2461	4197446.382
0	37.80141667	-122.4707833		2011	unk	18204.35429	4197904.836
0	37.80141667	-122.4707833		2011	unk	18204.35429	4197904.836
0	37.80042222	-122.4516694		2011	unk	19882.4654	4197695.662
0	37.789632	-122.460365		2011	unk	19045.87129	4196542.014
0	37.80141667	-122.4707833		2011	unk	18204.35429	4197904.836
0	37.797859	-122.473704		2011	unk	17923.7325	4197524.784
0	37.80019444	-122.4611056		2011	unk	19049.32905	4197719.052
0	37.801363	-122.473156		2011	unk	17994.88919	4197911.154
0	37.801363	-122.473156		2011	unk	17994.88919	4197911.154
0	37.803793	-122.475479		2011	unk	17806.01313	4198193.092
0	37.80653333	-122.4732667		2011	unk	18018.86343	4198486.019
0	37.79926944	-122.4620083		2011	unk	18963.74821	4197620.971
0	37.79926944	-122.4620083		2011	unk	18963.74821	4197620.971
0	37.789846	-122.457138		2011	unk	19331.71463	4196549.127
0	37.78993611	-122.4574278		2011	unk	19306.75555	4196560.631
0	37.79723056	-122.4584806		2011	unk	19261.40181	4197376.289
0	37.80117778	-122.4625		2011	unk	18932.8358	4197835.478
0	37.79869722	-122.4489889		2011	unk	20107.50679	4197490.244
0	37.789325	-122.456784		2011	unk	19359.53118	4196489.431
0	37.80541944	-122.4717806		2011	unk	18142.56467	4198354.603
0	37.79908333	-122.4744528		2011	unk	17865.72283	4197664.653
0	37.79908333	-122.4744528		2011	unk	17865.72283	4197664.653
0	37.80618889	-122.4726639		2011	unk	18069.73982	4198444.641
0	37.80141667	-122.4707833		2011	unk	18204.35429	4197904.836
0	37.791595	-122.475879		2011	unk	17691.15521	4196840.273
0	37.790205	-122.475802		2011	unk	17688.87266	4196685.48
0	37.80141667	-122.4707833		2011	unk	18204.35429	4197904.836
0	37.80141667	-122.4707833		2011	unk	18204.35429	4197904.836
0	37.79890278	-122.4611306		2011	unk	19038.71871	4197575.711
0	37.79890278	-122.4611306		2011	unk	19038.71871	4197575.711
0	37.795085	-122.454		2011	unk	19642.36868	4197114.854
0	37.80141667	-122.4707833		2011	unk	18204.35429	4197904.836
0	37.80141667	-122.4707833		2011	unk	18204.35429	4197904.836
0	37.798054	-122.466372		2011	unk	18571.23049	4197508.516
0	37.805177	-122.473734		2011	unk	17968.83168	4198337.784
0	37.798498	-122.473854		2011	unk	17914.68046	4197596.538
0	37.79888889	-122.4608333		2011	unk	19064.83126	4197572.633
0	37.8	-122.4508333		2011	unk	19953.41151	4197644.454
0	37.800893	-122.473061		2011	unk	18000.19599	4197858.457
0	37.798565	-122.47108		2011	unk	18159.61018	4197589.623
0	37.794089	-122.451024		2011	unk	19898.20551	4196988.88
0	37.796856	-122.451714	Umbellularia californica	2011	umbe	19855.36414	4197299.778
0	37.80141667	-122.4707833		2011	unk	18204.35429	4197904.836
0	37.80141667	-122.4707833		2011	unk	18204.35429	4197904.836
0	37.798286	-122.474715		2011	unk	17837.41094	4197577.447
0	37.798461	-122.471498		2011	unk	18122.09067	4197580.234
0	37.798221	-122.471725		2011	unk	18100.51841	4197554.751
0	37.798221	-122.471725		2011	unk	18100.51841	4197554.751
0	37.789293	-122.456901		2011	unk	19349.00983	4196486.48
0	37.789434	-122.456648		2011	unk	19372.22797	4196500.836
0	37.80118333	-122.4627389		2011	unk	18911.81679	4197837.329
0	37.796121	-122.450931		2011	unk	19919.60206	4197214.103
0	37.798017	-122.474712		2011	unk	17835.92018	4197547.553
0	37.79926944	-122.4620083		2011	unk	18963.74821	4197620.971
0	37.79831389	-122.451225		2011	unk	19907.935	4197459.191
0	37.79766667	-122.4565944		2011	unk	19430.4842	4197414.994
0	37.789199	-122.457421		2011	unk	19302.56172	4196478.723
0	37.79719444	-122.4584722		2011	unk	19261.9072	4197372.233
0	37.79075	-122.4544167		2011	unk	19577.46459	4196635.499
0	37.8019	-122.4765		2011	unk	17703.67454	4197988.115
0	37.79380278	-122.4743389		2011	unk	17841.31089	4197077.528
0	37.79645833	-122.4752722		2011	unk	17776.37449	4197377.324
0	37.792948	-122.454724		2011	unk	19564.66397	4196881.224
0	37.80567778	-122.4718333		2011	unk	18139.60528	4198383.571
0	37.79203056	-122.4573361		2011	unk	19328.45852	4196792.797
0	37.7982	-122.4783389		2011	unk	17517.44724	4197586.663
0	37.79578056	-122.4751167		2011	unk	17785.65781	4197301.236
0	37.791181	-122.475113		2011	unk	17755.97377	4196790.322
0	37.80588333	-122.4693861		2011	unk	18356.61366	4198393.74
0	37.7928	-122.455727		2011	unk	19475.29403	4196869.959
0	37.79966	-122.46875		2011	unk	18372.10661	4197699.197
0	37.79661	-122.4683		2011	unk	18391.89064	4197358.093
0	37.80021	-122.47114		2011	unk	18165.04844	4197772.652
0	37.80141667	-122.4707833		2011	unk	18204.35429	4197904.836
0	37.80141667	-122.4707833		2011	unk	18204.35429	4197904.836
0	37.80653611	-122.4723361		2011	unk	18100.89315	4198481.511
0	37.792766	-122.454901		2011	unk	19547.87957	4196861.921
0	37.793546	-122.457454		2011	unk	19327.92156	4196961.731
0	37.79870833	-122.4605194		2011	unk	19091.32222	4197550.957
0	37.79837778	-122.4494306		2011	unk	20066.50244	4197457.038
0	37.80083333	-122.4669444		2011	unk	18538.8896	4197820.187
1	37.272391	-122.155341	Umbellularia californica	2011	umbe	42773.99143	4137566.862
1	37.274132	-122.155424	Umbellularia californica	2011	umbe	42777.19	4137760.617
1	37.277873	-122.155755	Umbellularia californica	2011	umbe	42770.51806	4138177.693
1	37.274713	-122.154624	Umbellularia californica	2011	umbe	42851.71665	4137821.263
1	37.279112	-122.160749	Umbellularia californica	2011	umbe	42334.84117	4138339.528
1	37.280816	-122.160764	Umbellularia californica	2011	umbe	42343.86296	4138528.845
1	37.279733	-122.160798	Umbellularia californica	2011	umbe	42334.2656	4138408.734
1	37.281476	-122.159345	Umbellularia californica	2011	umbe	42473.79958	4138595.256
1	37.285086	-122.159476	Umbellularia californica	2011	umbe	42484.10364	4138996.814
1	37.28204	-122.154262	Umbellularia californica	2011	umbe	42928.30298	4138633.234
1	37.281674	-122.153125	Umbellularia californica	2011	umbe	43026.98245	4138587.074
1	37.283483	-122.156747	Umbellularia californica	2011	umbe	42716.5392	4138805.544
1	37.282635	-122.159629	Umbellularia californica	2011	umbe	42455.63703	4138725.351
1	37.28392	-122.15111	Umbellularia californica	2011	umbe	43219.42005	4138826.745
1	37.28319	-122.159557	Umbellularia californica	2011	umbe	42465.39789	4138786.64
1	37.284628	-122.159716	Umbellularia californica	2011	umbe	42460.0239	4138947.114
1	37.276956	-122.15151	Umbellularia californica	2011	umbe	43141.68893	4138055.272
1	37.278995	-122.150739	Umbellularia californica	2011	umbe	43222.47732	4138277.984
1	37.276546	-122.15259	Umbellularia californica	2011	umbe	43043.35396	4138014.972
1	37.28072	-122.151247	Umbellularia californica	2011	umbe	43187.85553	4138472.021
1	37.280068	-122.150797	Umbellularia californica	2011	umbe	43223.83653	4138397.431
1	37.275906	-122.153336	Umbellularia californica	2011	umbe	42973.26491	4137947.511
1	37.280979	-122.151485	Umbellularia californica	2011	umbe	43168.30531	4138501.939
1	37.277958	-122.150977	Umbellularia californica	2011	umbe	43195.06758	4138163.97
1	37.27246	-122.156159	Umbellularia californica	2011	umbe	42701.80961	4137578.492
1	37.272617	-122.158191	Umbellularia californica	2011	umbe	42522.41522	4137605.786
1	37.275154	-122.153312	Umbellularia californica	2011	umbe	42970.83309	4137863.879
1	37.273014	-122.157515	Umbellularia californica	2011	umbe	42584.82277	4137646.596
1	37.270307	-122.158472	Umbellularia californica	2011	umbe	42483.44962	4137350.603
1	37.275357	-122.152943	Umbellularia californica	2011	umbe	43004.81334	4137884.635
1	37.271407	-122.158726	Umbellularia californica	2011	umbe	42467.58471	4137474.001
1	37.275624	-122.153452	Umbellularia californica	2011	umbe	42961.25923	4137916.755
1	37.28123	-122.17273		2011	unk	41284.47113	4138632.987
1	37.29152	-122.1842	Umbellularia californica	2011	umbe	40329.39	4139831.674
1	37.29237	-122.18471	Umbellularia californica	2011	umbe	40289.32651	4139928.563
1	37.27919	-122.17347	Umbellularia californica	2011	umbe	41206.37537	4138410.027
1	37.28411	-122.17426	Umbellularia californica	2011	umbe	41166.23806	4138960.285
1	37.28493	-122.17373	Umbellularia californica	2011	umbe	41218.26577	4139048.774
1	37.28453	-122.17203	Umbellularia californica	2011	umbe	41366.68711	4138996.077
1	37.28336	-122.17246	Umbellularia californica	2011	umbe	41321.40346	4138868.229
1	37.28393056	-122.2175694	Umbellularia californica	2011	umbe	37321.79978	4139152.073
1	37.28876111	-122.215225	Umbellularia californica	2011	umbe	37559.51276	4139677.055
1	37.28424167	-122.2203667	Umbellularia californica	2011	umbe	37075.4729	4139200.361
1	37.28757222	-122.2165722	Umbellularia californica	2011	umbe	37432.66338	4139551.627
1	37.28543333	-122.2179944	Umbellularia californica	2011	umbe	37293.31766	4139321.06
1	37.20452	-122.0692	Umbellularia californica	2011	umbe	50014.58657	4129615.258
1	37.20945	-122.06522	Umbellularia californica	2011	umbe	50397.47892	4130143.799
1	37.20682	-122.06949	Umbellularia californica	2011	umbe	50002.52726	4129872.065
1	37.2054	-122.06476	Umbellularia californica	2011	umbe	50414.23325	4129691.84
1	37.20275	-122.06594	Umbellularia californica	2011	umbe	50293.63905	4129403.164
1	37.19989	-122.06195	Umbellularia californica	2011	umbe	50631.07184	4129066.559
1	37.19309	-122.06047	Umbellularia californica	2011	umbe	50722.12124	4128304.351
1	37.20378	-122.07676	Umbellularia californica	2011	umbe	49338.60852	4129569.126
1	37.21184	-122.06751	Umbellularia californica	2011	umbe	50208.30338	4130420.125
1	37.20828	-122.06788	Umbellularia californica	2011	umbe	50154.23595	4130026.534
1	37.21445	-122.06789	Umbellularia californica	2011	umbe	50190.09708	4130711.787
1	37.2063	-122.0555333	Umbellularia californica	2011	umbe	51239.18431	4129747.904
1	37.20741667	-122.0606167	Umbellularia californica	2011	umbe	50794.2743	4129896.083
1	37.20536667	-122.05495	Umbellularia californica	2011	umbe	51285.45387	4129641.483
1	37.2045	-122.0543667	Umbellularia californica	2011	umbe	51332.12073	4129542.465
1	37.20346667	-122.0544333	Umbellularia californica	2011	umbe	51320.06746	4129428.026
1	37.20316667	-122.0555833	Umbellularia californica	2011	umbe	51216.12883	4129400.174
1	37.20176667	-122.0551	Umbellularia californica	2011	umbe	51250.74569	4129242.402
1	37.19996667	-122.0545333	Umbellularia californica	2011	umbe	51290.39776	4129039.813
1	37.387501	-122.268669	Umbellularia californica	2011	umbe	33430.39424	4150907.119
0	37.387501	-122.268669	Notholithocarpus densiflorus	2011	notho	33430.39424	4150907.119
1	37.388	-122.270164	Umbellularia californica	2011	umbe	33301.00963	4150969.96
0	37.388565	-122.26922	Umbellularia californica	2011	umbe	33388.18175	4151028.026
1	37.388	-122.269165	Umbellularia californica	2011	umbe	33389.5417	4150965.001
1	37.387665	-122.268333	Umbellularia californica	2011	umbe	33461.19083	4150923.666
1	37.388668	-122.26767	Umbellularia californica	2011	umbe	33526.18317	4151031.774
1	37.3878	-122.2683	Umbellularia californica	2011	umbe	33464.95484	4150938.496
0	38.5425805	-122.8744472	Umbellularia californica	2011	umbe	-12139.24002	4282409.455
0	38.54168	-122.8726194	Umbellularia californica	2011	umbe	-11986.17773	4282299.193
0	38.5416361	-122.88046	Umbellularia californica	2011	umbe	-12670.58538	4282338.19
1	38.543761	-122.8899861	Umbellularia californica	2011	umbe	-13486.56906	4282627.637
1	38.5437416	-122.8900583	Umbellularia californica	2011	umbe	-13493.00693	4282625.887
0	38.5419305	-122.8762694	Umbellularia californica	2011	umbe	-12302.85636	4282347.439
0	38.541183	-122.8793527	Umbellularia californica	2011	umbe	-12577.20271	4282281.654
0	38.5400194	-122.87716	Umbellularia californica	2011	umbe	-12394.1786	4282140.112
0	38.4561361	-122.649883	Umbellularia californica	2011	umbe	6861.545754	4271575.015
1	38.41573	-122.60331		2011	unk	10655.77948	4266837.401
1	38.42345	-122.60079		2011	unk	10928.2735	4267681.524
1	38.42453	-122.60095		2011	unk	10921.60365	4267802.344
1	38.42129	-122.60068		2011	unk	10923.26351	4267441.003
1	38.41855	-122.6004		2011	unk	10929.18531	4267135.15
1	38.41723	-122.60122		2011	unk	10848.58859	4266992.89
1	38.42357	-122.60095	Umbellularia californica	2011	umbe	10915.10427	4267695.706
1	38.41536	-122.60381		2011	unk	10609.57629	4266798.965
1	38.422899	-122.584829	Umbellularia californica	2011	umbe	12319.30627	4267535.437
0	38.3713083	-122.6222472	Umbellularia californica	2011	umbe	8699.06677	4262004.015
0	38.513016	-122.637316	Umbellularia californica	2011	umbe	8347.359941	4277825.927
0	38.51203	-122.63855	Umbellularia californica	2011	umbe	8232.926155	4277723.02
0	38.51255	-122.63853	Umbellularia californica	2011	umbe	8238.222931	4277780.676
0	38.5129	-122.638	Umbellularia californica	2011	umbe	8286.870198	4277816.711
0	38.46043	-122.691216	Umbellularia californica	2011	umbe	3280.765547	4272274.957
0	38.46025	-122.691083	Umbellularia californica	2011	umbe	3291.14279	4272254.241
0	38.45345	-122.67935	Umbellularia californica	2011	umbe	4269.22008	4271435.411
0	38.451583	-122.67786	Umbellularia californica	2011	umbe	4386.550485	4271219.967
0	38.48583	-122.70613	Umbellularia californica	2011	umbe	2153.534716	4275177.386
1	38.4858	-122.70655	Umbellularia californica	2011	umbe	2116.656116	4275176.334
0	38.48593	-122.70648	Umbellularia californica	2011	umbe	2123.666085	4275190.395
0	38.48593	-122.70648	Umbellularia californica	2011	umbe	2123.666085	4275190.395
0	38.48239	-122.715486	Umbellularia californica	2011	umbe	1312.833962	4274846.09
0	38.495052	-122.712667	Umbellularia californica	2011	umbe	1646.554778	4276237.334
0	38.499548	-122.714619	Umbellularia californica	2011	umbe	1507.253878	4276747.39
1	38.483525	-122.716789	Umbellularia californica	2011	umbe	1206.914226	4274979.26
0	38.42642	-122.6825083	Umbellularia californica	2011	umbe	3807.58666	4268449.86
0	38.4150527	-122.6764472	Umbellularia californica	2011	umbe	4259.232219	4267154.392
1	38.4143638	-122.676338	Umbellularia californica	2011	umbe	4264.049746	4267077.277
1	38.4135027	-122.6760027	Umbellularia californica	2011	umbe	4287.447299	4266979.812
1	38.433381	-122.606075	Umbellularia californica	2011	umbe	10533.74513	4268812.833
1	38.433197	-122.606601	Umbellularia californica	2011	umbe	10486.5395	4268795.198
1	38.431841	-122.603569	Umbellularia californica	2011	umbe	10742.26967	4268628.411
1	38.434042	-122.599313	Umbellularia californica	2011	umbe	11129.03772	4268850.23
1	38.430045	-122.601052	Umbellularia californica	2011	umbe	10950.03147	4268415.5
0	38.428956	-122.60104	Umbellularia californica	2011	umbe	10943.70625	4268294.468
1	38.432194	-122.604405	Umbellularia californica	2011	umbe	10671.61582	4268672.078
0	38.4594916	-122.6584916	Umbellularia californica	2011	umbe	6132.578335	4271994.057
0	38.503038	-122.71112	Umbellularia californica	2011	umbe	1836.841084	4277116.057
0	38.503105	-122.7113583	Umbellularia californica	2011	umbe	1816.502856	4277124.795
0	38.503227	-122.71152	Umbellularia californica	2011	umbe	1803.23165	4277139.227
0	38.503575	-122.7108	Umbellularia californica	2011	umbe	1868.488476	4277173.971
0	38.5033472	-122.710125	Umbellularia californica	2011	umbe	1925.834711	4277144.998
1	38.50291	-122.70943	Umbellularia californica	2011	umbe	1983.479259	4277092.655
0	38.50287	-122.70974	Umbellularia californica	2011	umbe	1956.142151	4277089.896
0	38.5032916	-122.7107805	Rhododendron sp.	2011	rhodo	1868.230608	4277142.384
1	38.2996305	-122.5388194	Umbellularia californica	2011	umbe	15515.76409	4253599.653
0	38.300316	-122.4838472	Umbellularia californica	2011	umbe	20332.17543	4253388.033
0	38.303175	-122.48255	Umbellularia californica	2011	umbe	20464.61326	4253698.843
0	38.311072	-122.4716972	Umbellularia californica	2011	umbe	21466.61757	4254519.549
1	38.286873	-122.53197	Umbellularia californica	2011	umbe	16030.26583	4252146.563
1	38.286873	-122.53197	Umbellularia californica	2011	umbe	16030.26583	4252146.563
1	38.286873	-122.53197	Umbellularia californica	2011	umbe	16030.26583	4252146.563
1	38.286873	-122.53197	Umbellularia californica	2011	umbe	16030.26583	4252146.563
1	38.286873	-122.53197	Umbellularia californica	2011	umbe	16030.26583	4252146.563
1	38.286873	-122.53197	Umbellularia californica	2011	umbe	16030.26583	4252146.563
0	38.2727	-122.435	Umbellularia californica	2011	umbe	24426.95957	4250067.344
0	38.3025	-122.433	Umbellularia californica	2011	umbe	24797.14975	4253367.023
0	38.3025	-122.433	Rhododendron sp.	2011	rhodo	24797.14975	4253367.023
0	38.2844	-122.45361	Umbellularia californica	2011	umbe	22874.26708	4251463.119
0	38.280833	-122.435	Umbellularia californica	2011	umbe	24480.20332	4250970.707
0	38.2844	-122.45361		2011	unk	22874.26708	4251463.119
0	38.2844	-122.453611	Umbellularia californica	2011	umbe	22874.17953	4251463.124
0	38.2844	-122.45361	Umbellularia californica	2011	umbe	22874.26708	4251463.119
0	38.301675	-122.517059	Rhododendron sp.	2011	rhodo	17434.12459	4253712.496
0	38.301675	-122.517059	Rhododendron sp.	2011	rhodo	17434.12459	4253712.496
0	38.339	-122.5066	Umbellularia californica	2011	umbe	18597.44377	4257803.688
0	38.3384	-122.5045	Umbellularia californica	2011	umbe	18777.17802	4257726.057
1	38.3373	-122.5027	Umbellularia californica	2011	umbe	18927.35047	4257594.46
0	38.3333	-122.5039	Umbellularia californica	2011	umbe	18795.81059	4257156.427
0	38.3328	-122.5036	Umbellularia californica	2011	umbe	18818.73902	4257099.32
0	38.3379	-122.4952	Umbellularia californica	2011	umbe	19587.4784	4257621.923
0	38.3377	-122.5013	Umbellularia californica	2011	umbe	19052.48651	4257631.573
0	38.3413	-122.5026	Umbellularia californica	2011	umbe	18962.65078	4258038.245
0	38.36472	-122.525		2011	unk	17159.19017	4260757.037
0	38.36555	-122.525555		2011	unk	17116.18883	4260852.146
0	38.369722	-122.52361		2011	unk	17314.10275	4261305.351
0	38.298055	-122.53222	Umbellularia californica	2011	umbe	16082.92928	4253389.951
1	38.2977	-122.531944	Umbellularia californica	2011	umbe	16104.72215	4253349.068
1	38.37864	-122.49139	Umbellularia californica	2011	umbe	20190.78518	4262127.29
1	38.37798	-122.49197	Umbellularia californica	2011	umbe	20135.69593	4262057.006
1	38.37625	-122.49236	Umbellularia californica	2011	umbe	20090.12389	4261866.88
1	38.37524	-122.49251	Umbellularia californica	2011	umbe	20070.31074	4261755.476
1	38.37392	-122.49387	Umbellularia californica	2011	umbe	19942.63696	4261615.955
1	38.3714	-122.49532	Umbellularia californica	2011	umbe	19799.12847	4261343.613
0	38.37018	-122.49724	Umbellularia californica	2011	umbe	19623.13781	4261218.129
0	38.367466	-122.506116	Umbellularia californica	2011	umbe	18828.92095	4260963.073
0	38.366966	-122.50655	Umbellularia californica	2011	umbe	18787.64412	4260909.806
0	38.3668	-122.506766	Umbellularia californica	2011	umbe	18767.65131	4260892.498
0	38.3663	-122.5061833	Umbellularia californica	2011	umbe	18815.28595	4260833.91
0	38.36605	-122.50715	Umbellularia californica	2011	umbe	18729.08451	4260811.199
0	38.3667166	-122.5070833	Umbellularia californica	2011	umbe	18739.34867	4260884.894
0	38.367416	-122.5069	Umbellularia californica	2011	umbe	18760.02754	4260961.622
1	38.36854	-122.50114	Umbellularia californica	2011	umbe	19271.20495	4261056.344
0	38.3689	-122.51118	Umbellularia californica	2011	umbe	18395.612	4261148.868
0	38.36909	-122.58258	Umbellularia californica	2011	umbe	12152.96782	4261546.375
1	38.3	-122.5	Umbellularia californica	2011	umbe	18916.20197	4253437.188
1	38.36774	-122.49823	Umbellularia californica	2011	umbe	19520.37145	4260952.274
1	38.36855	-122.50046	Umbellularia californica	2011	umbe	19330.73654	4261053.9
1	38.36774	-122.49844	Umbellularia californica	2011	umbe	19502.00701	4260953.371
0	38.370166	-122.4987		2011	unk	19495.37266	4261224.202
0	38.370166	-122.4982		2011	unk	19539.09604	4261221.589
0	38.37066666	-122.4970666		2011	unk	19641.53041	4261271.279
1	38.394642	-122.924514	Umbellularia californica	2011	umbe	-17568.58099	4266255.442
0	38.395123	-122.924797	Umbellularia californica	2011	umbe	-17589.87985	4266310.473
1	38.395462	-122.92403	Umbellularia californica	2011	umbe	-17520.39302	4266343.812
1	38.395109	-122.924024	Umbellularia californica	2011	umbe	-17522.39586	4266304.562
0	38.399975	-122.924014	Umbellularia californica	2011	umbe	-17486.68009	4266845.096
1	38.394795	-122.923827	Umbellularia californica	2011	umbe	-17507.42004	4266268.568
1	38.394699	-122.923473	Umbellularia californica	2011	umbe	-17477.15658	4266255.908
1	38.394343	-122.923615	Umbellularia californica	2011	umbe	-17492.12054	4266217.158
1	38.392558	-122.888136	Umbellularia californica	2011	umbe	-14402.84459	4265819.562
0	38.392558	-122.888136	Umbellularia californica	2011	umbe	-14402.84459	4265819.562
0	38.392558	-122.888136	Umbellularia californica	2011	umbe	-14402.84459	4265819.562
1	38.393278	-122.888672	Umbellularia californica	2011	umbe	-14444.58488	4265902.551
0	38.399721	-122.819981		2011	unk	-8393.558806	4266235.857
0	38.348665	-122.645466	Umbellularia californica	2011	umbe	6514.273293	4259613.071
0	38.395777	-122.888796	Umbellularia californica	2011	umbe	-14437.64172	4266180.869
1	38.391162	-122.880175	Umbellularia californica	2011	umbe	-13716.71197	4265619.923
1	38.505138	-122.869111	Umbellularia californica	2011	umbe	-11939.98652	4278220.028
0	38.550962	-123.276128	Notholithocarpus densiflorus	2011	notho	-47124.56405	4285665.2
1	38.51155	-122.928272	Umbellularia californica	2011	umbe	-17058.43538	4279264.58
0	38.50965	-122.929478	Umbellularia californica	2011	umbe	-17177.35677	4279060.306
0	38.5118638	-122.9284	Umbellularia californica	2011	umbe	-17067.35417	4279300.164
0	38.3548	-122.82	Umbellularia californica	2011	umbe	-8711.020974	4261245.656
0	38.3548	-122.82	Umbellularia californica	2011	umbe	-8711.020974	4261245.656
0	38.3548	-122.82	Umbellularia californica	2011	umbe	-8711.020974	4261245.656
0	38.3548	-122.82	Umbellularia californica	2011	umbe	-8711.020974	4261245.656
1	38.3782	-122.8805	Umbellularia californica	2011	umbe	-13837.22415	4264181.748
1	38.3782	-122.8805	Umbellularia californica	2011	umbe	-13837.22415	4264181.748
1	38.3782	-122.8805	Umbellularia californica	2011	umbe	-13837.22415	4264181.748
0	38.3782	-122.8805	Notholithocarpus densiflorus	2011	notho	-13837.22415	4264181.748
1	38.3782	-122.8805	Umbellularia californica	2011	umbe	-13837.22415	4264181.748
1	38.3782	-122.8805	Umbellularia californica	2011	umbe	-13837.22415	4264181.748
0	38.3782	-122.8805	Umbellularia californica	2011	umbe	-13837.22415	4264181.748
1	38.3782	-122.8805	Umbellularia californica	2011	umbe	-13837.22415	4264181.748
0	38.38337	-122.82565	Umbellularia californica	2011	umbe	-9004.252125	4264450.802
0	38.357073	-122.870473	Umbellularia californica	2011	umbe	-13110.15754	4261778.661
0	38.357817	-122.869714	Umbellularia californica	2011	umbe	-13038.49038	4261857.078
0	38.364171	-122.876096	Umbellularia californica	2011	umbe	-13551.66617	4262598.602
1	38.373165	-122.872255	Umbellularia californica	2011	umbe	-13151.91516	4263576.319
0	38.38434	-122.815158	Umbellularia californica	2011	umbe	-8079.999049	4264500.49
0	38.365573	-122.824052	Umbellularia californica	2011	umbe	-8989.715723	4262464.866
0	38.358775	-122.836231	Umbellularia californica	2011	umbe	-10102.84644	4261777.178
0	38.7894683	-123.02786		2011	unk	-23715.119	4310708.048
0	38.7894	-123.02926		2011	unk	-23837.35297	4310708.514
0	38.7908016	-123.0239183		2011	unk	-23362.59035	4310833.511
0	38.7807183	-123.0339516		2011	unk	-24309.16086	4309770.984
0	38.78046	-123.026183		2011	unk	-23635.48411	4309697.587
0	38.785016	-123.019783		2011	unk	-23045.49114	4310166.974
0	38.482071	-122.873399		2011	unk	-12478.39209	4275681.411
1	38.481797	-122.873229	Umbellularia californica	2011	umbe	-12465.49569	4275650.021
0	38.480968	-122.878286	Umbellularia californica	2011	umbe	-12912.99107	4275586.205
0	38.482071	-122.873399	Umbellularia californica	2011	umbe	-12478.39209	4275681.411
0	38.480479	-122.877886	Umbellularia californica	2011	umbe	-12881.54139	4275529.642
1	38.416366	-122.945591	Umbellularia californica	2011	umbe	-19255.23902	4268787.885
0	38.416366	-122.945591	Notholithocarpus densiflorus	2011	notho	-19255.23902	4268787.885
1	38.416182	-122.945992	Umbellularia californica	2011	umbe	-19291.61175	4268769.711
0	38.41684	-122.945667		2011	unk	-19258.47399	4268840.974
1	38.41618	-122.945222	Umbellularia californica	2011	umbe	-19224.3234	4268765.134
1	38.41618	-122.945222	Umbellularia californica	2011	umbe	-19224.3234	4268765.134
1	38.419192	-122.949389	Umbellularia californica	2011	umbe	-19566.87567	4269123.333
1	38.420728	-122.951113	Umbellularia californica	2011	umbe	-19706.50351	4269303.737
0	38.388091	-123.011026	Umbellularia californica	2011	umbe	-25180.19988	4266018.733
1	38.400437	-122.986682	Umbellularia californica	2011	umbe	-22962.16598	4267251.438
0	38.388091	-123.011026	Umbellularia californica	2011	umbe	-25180.19988	4266018.733
1	38.379914	-122.971282	Umbellularia californica	2011	umbe	-21763.90545	4264883.792
0	38.431629	-122.891007	Umbellularia californica	2011	umbe	-14375.59358	4270176.193
1	38.391943	-122.890413	Umbellularia californica	2011	umbe	-14606.30722	4265763.993
1	38.393759	-122.890126	Umbellularia californica	2011	umbe	-14568.28727	4265964.132
1	38.391627	-122.889092	Umbellularia californica	2011	umbe	-14493.05614	4265721.488
1	38.391878	-122.889031	Umbellularia californica	2011	umbe	-14485.9364	4265749.03
1	38.392171	-122.888905	Umbellularia californica	2011	umbe	-14472.83461	4265780.875
1	38.392462	-122.888905	Umbellularia californica	2011	umbe	-14470.7637	4265813.204
1	38.39749	-122.899806	Umbellularia californica	2011	umbe	-15388.02275	4266432.898
1	38.392025	-122.89074	Umbellularia californica	2011	umbe	-14634.31432	4265774.935
0	38.406288	-122.8349916	Rhododendron sp.	2011	rhodo	-9659.50272	4267048.586
1	38.3754361	-122.84926	Umbellularia californica	2011	umbe	-11124.82761	4263700.47
1	38.37555	-122.8473305	Umbellularia californica	2011	umbe	-10955.28373	4263702.393
1	38.375472	-122.846716	Umbellularia californica	2011	umbe	-10902.09523	4263690.311
0	38.3759861	-122.8468944	Umbellularia californica	2011	umbe	-10914.06578	4263748.416
0	38.3755916	-122.847138	Umbellularia californica	2011	umbe	-10938.15536	4263705.944
0	38.3758805	-122.84667	Umbellularia californica	2011	umbe	-10895.18743	4263735.437
0	38.3756694	-122.84655	Umbellularia californica	2011	umbe	-10886.18406	4263711.318
0	38.55965	-122.79795	Umbellularia californica	2011	umbe	-5345.027907	4283880.611
0	38.602516	-122.858116	Umbellularia californica	2011	umbe	-10288.39887	4288976.602
0	38.603033	-122.857583	Umbellularia californica	2011	umbe	-10238.25809	4289031.063
0	38.60376	-122.85766	Umbellularia californica	2011	umbe	-10239.80064	4289112.256
0	38.602116	-122.8606	Umbellularia californica	2011	umbe	-10507.78795	4288946.031
0	38.60135	-122.860616	Umbellularia californica	2011	umbe	-10514.63257	4288861.023
0	38.60135	-122.860616	Umbellularia californica	2011	umbe	-10514.63257	4288861.023
0	38.61315	-122.84095	Umbellularia californica	2011	umbe	-8716.544374	4290062.294
0	38.61437	-122.831959	Umbellularia californica	2011	umbe	-7924.237025	4290147.833
0	38.614471	-122.831801	Umbellularia californica	2011	umbe	-7909.750576	4290158.176
0	38.614126	-122.832134	Umbellularia californica	2011	umbe	-7941.217906	4290121.699
1	38.76556	-122.907223	Umbellularia californica	2011	umbe	-13397.94081	4307365.066
0	38.354011	-122.9847805	Umbellularia californica	2011	umbe	-23131.6357	4262082.766
1	38.3540388	-122.9860361	Umbellularia californica	2011	umbe	-23241.27893	4262093.001
1	38.3534138	-122.987744	Umbellularia californica	2011	umbe	-23395.21129	4262033.288
0	38.3528527	-122.98756	Umbellularia californica	2011	umbe	-23383.17131	4261969.903
1	38.5116277	-122.9322722	Umbellularia californica	2011	umbe	-17407.05045	4279295.797
0	38.618744	-122.8935305		2011	unk	-13259.55189	4290977.669
0	38.61841944	-122.8933083	Umbellularia californica	2011	umbe	-13242.5087	4290940.365
0	38.6184194	-122.8933083	Umbellularia californica	2011	umbe	-13242.50898	4290940.361
0	38.6184194	-122.8933083	Umbellularia californica	2011	umbe	-13242.50898	4290940.361
0	38.623071	-122.842602		2011	unk	-8790.144922	4291173.627
1	38.622783	-122.845083		2011	unk	-9008.407267	4291155.447
1	38.62217	-122.84663	Umbellularia californica	2011	umbe	-9147.580901	4291095.964
0	38.62085	-122.84756		2011	unk	-9238.005284	4290954.504
0	38.687651	-122.799625		2011	unk	-4589.585364	4298109.452
0	38.65944	-122.83942	Umbellularia californica	2011	umbe	-8254.805804	4295196.203
0	38.68022	-122.80328		2011	unk	-4960.262751	4297304.155
0	38.69798	-122.78307	Umbellularia californica	2011	umbe	-3075.516268	4299165.506
0	38.6237	-122.84888		2011	unk	-9332.80162	4291278.47
0	38.69391	-122.7886	Umbellularia californica	2011	umbe	-3585.590283	4298743.872
0	38.53211	-122.679977	Umbellularia californica	2011	umbe	4755.390819	4280176.71
0	38.37178	-122.49477	Umbellularia californica	2011	umbe	19849.74388	4261382.95
0	38.37177	-122.49485	Umbellularia californica	2011	umbe	19842.68197	4261382.257
0	38.372	-122.4944	Umbellularia californica	2011	umbe	19883.5576	4261405.455
0	38.37223	-122.49512	Umbellularia californica	2011	umbe	19822.12336	4261434.762
0	38.3727	-122.49466	Umbellularia californica	2011	umbe	19865.46521	4261484.566
0	38.737311	-122.4938	Umbellularia californica	2011	umbe	22368.50445	4301979.891
0	38.37328	-122.49375	Umbellularia californica	2011	umbe	19948.88543	4261544.239
0	38.37346	-122.49318	Umbellularia californica	2011	umbe	19999.92148	4261561.257
0	38.71628737	-122.7224873	Umbellularia californica	2011	umbe	2325.928964	4300867.006
0	38.37309	-122.49408	Umbellularia californica	2011	umbe	19918.76912	4261524.858
0	38.37355	-122.49045	Umbellularia californica	2011	umbe	20239.23611	4261557.006
0	38.37376	-122.49074	Umbellularia californica	2011	umbe	20215.26981	4261581.845
0	38.37642	-122.49058	Umbellularia californica	2011	umbe	20246.8924	4261876.473
0	38.37703	-122.49071	Umbellularia californica	2011	umbe	20239.56898	4261944.908
0	38.37807	-122.491	Umbellularia californica	2011	umbe	20221.10648	4262061.941
0	38.37377	-122.49091	Umbellularia californica	2011	umbe	20200.47093	4261583.843
0	38.3787	-122.49122	Umbellularia californica	2011	umbe	20206.04712	4262133.067
0	38.440092	-122.70299	Umbellularia californica	2011	umbe	2112.080092	4270079.511
0	38.438706	-122.7032	Umbellularia californica	2011	umbe	2084.173177	4269926.686
0	38.438845	-122.702931	Umbellularia californica	2011	umbe	2108.634402	4269940.667
0	38.438706	-122.7032	Umbellularia californica	2011	umbe	2084.173177	4269926.686
0	38.438706	-122.7032	Umbellularia californica	2011	umbe	2084.173177	4269926.686
0	38.438706	-122.7032	Umbellularia californica	2011	umbe	2084.173177	4269926.686
0	38.438706	-122.7032	Umbellularia californica	2011	umbe	2084.173177	4269926.686
0	38.36848	-122.49909	Umbellularia californica	2011	umbe	19450.0767	4261038.965
1	38.36869	-122.49886	Umbellularia californica	2011	umbe	19471.58384	4261061.089
0	38.643	-122.49846	Umbellularia californica	2011	umbe	21332.70679	4291528.502
0	38.36898	-122.49805	Umbellularia californica	2011	umbe	19544.34181	4261089.069
0	38.36877	-122.49738	Umbellularia californica	2011	umbe	19601.53855	4261062.242
0	38.36907	-122.49726	Umbellularia californica	2011	umbe	19614.02308	4261094.938
1	38.343124	-122.594507	Umbellularia californica	2011	umbe	10934.61026	4258725.404
1	38.343176	-122.594384	Umbellularia californica	2011	umbe	10945.72166	4258730.526
1	37.3135611	-122.2150194	Umbellularia californica	2011	umbe	37730.10458	4142430.37
1	37.3135611	-122.2150194	Umbellularia californica	2011	umbe	37730.10458	4142430.37
1	37.3135611	-122.2150194	Umbellularia californica	2011	umbe	37730.10458	4142430.37
1	37.3135611	-122.2150194	Notholithocarpus densiflorus	2011	notho	37730.10458	4142430.37
1	37.3135611	-122.2150194	Umbellularia californica	2011	umbe	37730.10458	4142430.37
1	37.300737	-122.163178	Umbellularia californica	2011	umbe	42250.75588	4140752.975
1	37.302093	-122.163322	Umbellularia californica	2011	umbe	42246.22695	4140904.271
1	37.304447	-122.167277	Umbellularia californica	2011	umbe	41909.67174	4141184.927
1	37.306326	-122.169706	Umbellularia californica	2011	umbe	41705.62286	4141405.421
1	37.306397	-122.170941	Umbellularia californica	2011	umbe	41596.49349	4141419.315
1	37.307173	-122.172439	Umbellularia californica	2011	umbe	41468.32827	4141512.787
1	37.307505	-122.173695	Umbellularia californica	2011	umbe	41358.92804	4141555.773
0	37.294792	-122.165492	Umbellularia californica	2011	umbe	42009.28859	4140103.973
1	37.27285	-122.1531917	Umbellularia californica	2011	umbe	42967.53398	4137607.417
1	37.27285	-122.1531917	Umbellularia californica	2011	umbe	42967.53398	4137607.417
1	37.27285	-122.1531917	Umbellularia californica	2011	umbe	42967.53398	4137607.417
1	37.27285	-122.1531917	Umbellularia californica	2011	umbe	42967.53398	4137607.417
1	37.27285	-122.1531917	Umbellularia californica	2011	umbe	42967.53398	4137607.417
1	37.27285	-122.1531917	Umbellularia californica	2011	umbe	42967.53398	4137607.417
1	37.27285	-122.1531917	Umbellularia californica	2011	umbe	42967.53398	4137607.417
1	37.27285	-122.1531917	Umbellularia californica	2011	umbe	42967.53398	4137607.417
1	37.27285	-122.1531917	Umbellularia californica	2011	umbe	42967.53398	4137607.417
1	37.27285	-122.1531917	Umbellularia californica	2011	umbe	42967.53398	4137607.417
1	37.27285	-122.1531917	Umbellularia californica	2011	umbe	42967.53398	4137607.417
1	37.27285	-122.1531917	Umbellularia californica	2011	umbe	42967.53398	4137607.417
1	37.27285	-122.1531917	Umbellularia californica	2011	umbe	42967.53398	4137607.417
1	37.27285	-122.1531917	Umbellularia californica	2011	umbe	42967.53398	4137607.417
1	37.27285	-122.1531917	Umbellularia californica	2011	umbe	42967.53398	4137607.417
1	37.1989667	-122.0543167	Umbellularia californica	2011	umbe	51303.70134	4128927.734
1	37.244598	-122.079952	Umbellularia californica	2011	umbe	49298.82869	4134117.404
1	37.218243	-122.076891	Umbellularia californica	2011	umbe	49413.2686	4131175.936
0	37.218185	-122.077213	Umbellularia californica	2011	umbe	49384.324	4131171.032
1	37.218655	-122.077395	Umbellularia californica	2011	umbe	49370.96478	4131224.096
1	37.218611	-122.078055	Umbellularia californica	2011	umbe	49312.08451	4131222.36
1	37.219999	-122.079165	Umbellularia californica	2011	umbe	49221.78739	4131381.804
1	37.217394	-122.073083	Umbellularia californica	2011	umbe	49746.41328	4131063.483
1	37.21665	-122.072777	Umbellularia californica	2011	umbe	49769.1547	4130979.4
1	37.472146	-122.357168	Umbellularia californica	2011	umbe	26123.19723	4160751.395
1	37.4753	-122.357426	Umbellularia californica	2011	umbe	26120.34534	4161103.008
0	37.470464	-122.3570202	Notholithocarpus densiflorus	2011	notho	26125.62343	4160563.831
1	37.470642	-122.355881	Umbellularia californica	2011	umbe	26227.59951	4160577.849
1	37.490377	-122.35698	Umbellularia californica	2011	umbe	26255.38162	4162775.338
1	37.515056	-122.379755	Umbellularia californica	2011	umbe	24396.89368	4165631.712
0	37.515496	-122.379698	Umbellularia californica	2011	umbe	24404.73932	4165680.294
1	37.20935	-122.0567167	Umbellularia californica	2011	umbe	51152.18917	4130092.242
1	37.20838333	-122.0564	Umbellularia californica	2011	umbe	51174.57584	4129983.385
1	37.20976667	-122.0556333	Umbellularia californica	2011	umbe	51250.89756	4130133.366
1	37.2097	-122.0542833	Umbellularia californica	2011	umbe	51370.41432	4130119.548
1	37.40565	-122.30758	Umbellularia californica	2011	umbe	30095.75761	4153116.666
1	37.4082	-122.30122	Umbellularia californica	2011	umbe	30675.22424	4153368.102
0	37.40175	-122.33389	Notholithocarpus densiflorus	2011	notho	27740.08366	4152815.385
1	37.40597	-122.30799	Umbellularia californica	2011	umbe	30061.43706	4153154.257
0	37.4058	-122.30867	Notholithocarpus densiflorus	2011	notho	30000.12278	4153138.777
1	37.40182	-122.30122	Umbellularia californica	2011	umbe	30635.28375	4152659.502
1	37.40625	-122.3056	Umbellularia californica	2011	umbe	30274.94709	4153173.407
1	37.29387	-122.18659	Umbellularia californica	2011	umbe	40131.67413	4140104.326
1	37.29418	-122.18532	Umbellularia californica	2011	umbe	40246.25361	4140132.557
1	37.29435	-122.18577	Umbellularia californica	2011	umbe	40207.36379	4140153.633
1	37.29459	-122.18608	Umbellularia californica	2011	umbe	40181.32371	4140181.8
1	37.29071	-122.18177	Umbellularia californica	2011	umbe	40540.06625	4139729.865
1	37.29261	-122.18275	Umbellularia californica	2011	umbe	40464.70436	4139945.657
0	37.29303	-122.1832	Umbellularia californica	2011	umbe	40427.33922	4139994.497
0	37.29395	-122.18503	Umbellularia californica	2011	umbe	40270.58054	4140105.599
1	37.33246	-122.20578	Umbellularia californica	2011	umbe	38665.65135	4144483.997
1	37.33281	-122.2045	Umbellularia californica	2011	umbe	38781.31452	4144516.597
1	37.33364	-122.20544	Umbellularia californica	2011	umbe	38703.04469	4144613.383
1	37.33167	-122.20448	Umbellularia californica	2011	umbe	38776.0944	4144389.89
1	37.3047444	-122.1283889	Umbellularia californica	2011	umbe	45361.44397	4141029.588
1	37.3047444	-122.1283889	Umbellularia californica	2011	umbe	45361.44397	4141029.588
1	37.3047444	-122.1283889	Umbellularia californica	2011	umbe	45361.44397	4141029.588
1	37.3047444	-122.1283889	Umbellularia californica	2011	umbe	45361.44397	4141029.588
1	37.3047444	-122.1283889	Umbellularia californica	2011	umbe	45361.44397	4141029.588
1	37.3047444	-122.1283889		2011	unk	45361.44397	4141029.588
1	37.3047444	-122.1283889		2011	unk	45361.44397	4141029.588
1	37.3047444	-122.1283889	Umbellularia californica	2011	umbe	45361.44397	4141029.588
0	37.2471528	-122.1256278	Notholithocarpus densiflorus	2011	notho	45258.91656	4134620.303
1	37.22401667	-122.0936167	Umbellularia californica	2011	umbe	47962.3421	4131897.093
1	37.22628333	-122.09385	Umbellularia californica	2011	umbe	47955.19753	4132149.935
1	37.21881667	-122.09485	Umbellularia californica	2011	umbe	47821.66903	4131325.51
1	37.2234	-122.0960667	Umbellularia californica	2011	umbe	47741.06578	4131840.343
1	37.25135	-122.1341167	Umbellularia californica	2011	umbe	44530.59901	4135127.385
1	37.25063333	-122.1337	Umbellularia californica	2011	umbe	44563.26439	4135045.782
1	37.25076667	-122.1346667		2011	unk	44478.2474	4135065.258
1	37.304053	-122.195233	Umbellularia californica	2011	umbe	39427.09648	4141277.469
1	37.295487	-122.196652	Umbellularia californica	2011	umbe	39248.77312	4140333.062
1	37.287097	-122.198631		2011	unk	39021.81519	4139410.942
1	37.291365	-122.207547		2011	unk	38256.79979	4139928.598
1	37.28736	-122.18005	Umbellularia californica	2011	umbe	40672.25252	4139349.431
1	37.28647	-122.17873	Umbellularia californica	2011	umbe	40783.95803	4139244.155
1	37.28583	-122.17658	Umbellularia californica	2011	umbe	40970.84351	4139162.604
1	37.28332	-122.17434	Umbellularia californica	2011	umbe	41154.32588	4138872.937
1	37.28203	-122.17459	Umbellularia californica	2011	umbe	41124.28121	4138730.887
1	37.28076	-122.17447	Umbellularia californica	2011	umbe	41127.19334	4138589.258
0	37.27908	-122.17507	Umbellularia californica	2011	umbe	41063.71094	4138405.599
1	37.27619	-122.17347	Umbellularia californica	2011	umbe	41188.10402	4138076.848
1	37.2949	-122.18425	Umbellularia californica	2011	umbe	40345.58969	4140207.301
1	37.29436	-122.18295	Umbellularia californica	2011	umbe	40457.64004	4140140.988
1	37.29385	-122.18235	Umbellularia californica	2011	umbe	40507.7646	4140081.421
1	37.2934	-122.18181	Umbellularia californica	2011	umbe	40552.93226	4140028.811
1	37.29399	-122.18188	Umbellularia californica	2011	umbe	40550.32175	4140094.678
1	37.29617	-122.18491	Umbellularia californica	2011	umbe	40294.78439	4140351.567
1	37.29563	-122.18533	Umbellularia californica	2011	umbe	40254.22137	4140293.643
1	37.29544	-122.1858	Umbellularia californica	2011	umbe	40211.35909	4140274.835
0	37.2906	-122.08663	Umbellularia californica	2011	umbe	48981.29969	4139258.096
0	37.28993	-122.08508	Umbellularia californica	2011	umbe	49114.81908	4139176.273
0	37.2883	-122.08514	Umbellularia californica	2011	umbe	49099.73603	4138995.539
0	37.28726	-122.0844	Umbellularia californica	2011	umbe	49159.17229	4138876.502
1	37.28334	-122.08449	Umbellularia californica	2011	umbe	49127.72131	4138441.595
1	37.28321	-122.08484	Umbellularia californica	2011	umbe	49095.88475	4138428.832
0	37.28411	-122.08314	Umbellularia californica	2011	umbe	49252.1256	4138520.652
0	37.28353	-122.08151	Umbellularia californica	2011	umbe	49393.29753	4138448.447
0	37.285941	-122.055824		2011	unk	51686.95575	4138593.732
0	37.285724	-122.059377		2011	unk	51370.39094	4138586.536
0	37.286542	-122.059274		2011	unk	51384.40273	4138676.888
1	37.223334	-122.0822	Umbellularia californica	2011	umbe	48972.16458	4131766.669
0	37.206111	-122.038889	Notholithocarpus densiflorus	2011	notho	52716.54665	4129647.955
1	37.205932	-122.038762	Umbellularia californica	2011	umbe	52726.76796	4129627.475
1	37.207218	-122.046667	Umbellularia californica	2011	umbe	52032.20619	4129807.757
1	37.207218	-122.046667	Notholithocarpus densiflorus	2011	notho	52032.20619	4129807.757
1	37.22361111	-122.0811111	Notholithocarpus densiflorus	2011	notho	49070.52421	4131792.241
0	37.22361	-122.08111	Umbellularia californica	2011	umbe	49070.61527	4131792.112
1	37.2233344	-122.0822	Notholithocarpus densiflorus	2011	notho	48972.16697	4131766.713
1	37.21941667	-122.1113667	Umbellularia californica	2011	umbe	46358.33806	4131471.383
1	37.218	-122.0949333	Umbellularia californica	2011	umbe	47809.37959	4131235.213
1	37.21623333	-122.0958167	Umbellularia californica	2011	umbe	47720.33718	4131043.246
0	37.324185	-122.178468		2011	unk	41037.27813	4143431.499
1	37.323551	-122.177536		2011	unk	41116.07164	4143356.545
1	37.322736	-122.17764		2011	unk	41101.87454	4143266.538
1	37.322645	-122.176605		2011	unk	41193.11855	4143251.389
1	37.322101	-122.175776		2011	unk	41263.32853	4143186.934
1	37.321196	-122.174845	Umbellularia californica	2011	umbe	41340.38516	4143081.89
1	37.32029	-122.174327	Umbellularia californica	2011	umbe	41380.80566	4142978.747
1	37.32029	-122.174327	Umbellularia californica	2011	umbe	41380.80566	4142978.747
1	37.2123222	-122.0633278	Umbellularia californica	2011	umbe	50582.6451	4130453.761
1	37.2123222	-122.0633278	Umbellularia californica	2011	umbe	50582.6451	4130453.761
1	37.212725	-122.0588194	Umbellularia californica	2011	umbe	50985.48269	4130477.046
0	37.2113194	-122.0648694	Notholithocarpus densiflorus	2011	notho	50439.74845	4130349.735
1	37.2113194	-122.0648694	Notholithocarpus densiflorus	2011	notho	50439.74845	4130349.735
1	37.2113194	-122.0648694	Umbellularia californica	2011	umbe	50439.74845	4130349.735
1	37.2113194	-122.0648694	Umbellularia californica	2011	umbe	50439.74845	4130349.735
1	37.2113194	-122.0648694	Umbellularia californica	2011	umbe	50439.74845	4130349.735
0	37.4081	-122.3074833	Umbellularia californica	2011	umbe	30119.68191	4153388.295
0	37.4081	-122.3074833	Umbellularia californica	2011	umbe	30119.68191	4153388.295
0	37.4081	-122.3074833	Notholithocarpus densiflorus	2011	notho	30119.68191	4153388.295
1	37.4081	-122.3074833	Umbellularia californica	2011	umbe	30119.68191	4153388.295
0	37.4081	-122.3074833	Umbellularia californica	2011	umbe	30119.68191	4153388.295
1	37.29964	-122.17773	Umbellularia californica	2011	umbe	40953.00203	4140701.94
1	37.29827	-122.17429	Umbellularia californica	2011	umbe	41249.85711	4140533.034
1	37.29876	-122.17233	Umbellularia californica	2011	umbe	41426.74071	4140577.913
1	37.29876	-122.17315	Umbellularia californica	2011	umbe	41353.98774	4140581.904
1	37.29917	-122.1741	Umbellularia californica	2011	umbe	41272.19935	4140632.063
0	37.29923	-122.17486	Umbellularia californica	2011	umbe	41205.13579	4140642.427
1	37.29944	-122.17604	Umbellularia californica	2011	umbe	41101.72331	4140671.496
1	37.29959	-122.17682	Umbellularia californica	2011	umbe	41033.43441	4140691.954
1	37.20020167	-122.06475	Umbellularia californica	2011	umbe	50384.18499	4129114.496
1	37.20041667	-122.0643667	Umbellularia californica	2011	umbe	50419.51516	4129136.548
1	37.20041667	-122.0638167	Umbellularia californica	2011	umbe	50468.37478	4129133.93
1	37.20015	-122.0628333	Umbellularia californica	2011	umbe	50554.14943	4129099.635
1	37.19965	-122.06205	Notholithocarpus densiflorus	2011	notho	50620.76079	4129040.381
1	37.19956667	-122.0608667	Umbellularia californica	2011	umbe	50725.38551	4129025.498
0	37.20045	-122.0669333	Umbellularia californica	2011	umbe	50191.70779	4129152.47
1	37.20296667	-122.06765	Umbellularia californica	2011	umbe	50143.0248	4129435.37
1	37.20336667	-122.0685167	Umbellularia californica	2011	umbe	50068.41571	4129483.92
0	37.20235	-122.0724833	Umbellularia californica	2011	umbe	49709.99326	4129389.919
1	37.2052	-122.06665	Umbellularia californica	2011	umbe	50245.15409	4129678.628
1	37.2053	-122.0651333	Umbellularia californica	2011	umbe	50380.47788	4129682.512
1	37.196437	-122.066094	Umbellularia californica	2011	umbe	50242.38126	4128702.812
1	37.195592	-122.063809	Umbellularia californica	2011	umbe	50440.35454	4128598.094
0	37.19611	-122.065316	Umbellularia californica	2011	umbe	50309.55314	4128662.793
1	37.216399	-122.06905	Umbellularia californica	2011	umbe	50098.67906	4130933.759
0	37.215273	-122.068202	Umbellularia californica	2011	umbe	50167.28809	4130804.671
1	37.214632	-122.067414	Umbellularia californica	2011	umbe	50233.45901	4130729.731
1	37.216479	-122.068618	Umbellularia californica	2011	umbe	50137.52459	4130940.584
1	37.27277778	-122.1466667	Umbellularia californica	2011	umbe	43546.20997	4137567.786
1	37.27277778	-122.1466667	Umbellularia californica	2011	umbe	43546.20997	4137567.786
1	37.27388889	-122.1488889	Umbellularia californica	2011	umbe	43355.71707	4137701.945
1	37.27444444	-122.1508333	Umbellularia californica	2011	umbe	43186.51644	4137773.063
1	37.27555556	-122.1522222	Umbellularia californica	2011	umbe	43069.98871	4137903.193
1	37.27333333	-122.1466667	Umbellularia californica	2011	umbe	43549.57549	4137629.485
1	37.27361111	-122.1469444	Umbellularia californica	2011	umbe	43526.61187	4137661.679
1	37.27333333	-122.1447222	Umbellularia californica	2011	umbe	43722.15434	4137620.073
1	37.25166667	-122.1225333	Umbellularia californica	2011	umbe	45560.85521	4135106.688
1	37.25118333	-122.1203	Umbellularia californica	2011	umbe	45756.20956	4135042.254
1	37.25221667	-122.1199833	Umbellularia californica	2011	umbe	45790.54966	4135155.488
1	37.25336667	-122.1175833	Umbellularia californica	2011	umbe	46010.5367	4135271.65
1	37.25288333	-122.1204833	Umbellularia californica	2011	umbe	45750.17751	4135231.933
1	37.25456667	-122.12135	Umbellularia californica	2011	umbe	45683.37832	4135423.054
1	37.25678333	-122.1229167	Umbellularia californica	2011	umbe	45557.65737	4135676.777
1	37.25685	-122.12215	Umbellularia californica	2011	umbe	45626.11995	4135680.487
1	37.25201667	-122.1244833		2011	unk	45389.84981	4135154.954
1	37.25071667	-122.1269833	Umbellularia californica	2011	umbe	45160.06657	4135022.631
1	37.24738333	-122.1255167	Umbellularia californica	2011	umbe	45270.17025	4134645.369
1	37.24563333	-122.12965	Umbellularia californica	2011	umbe	44892.64623	4134470.95
1	37.24801667	-122.1240833	Umbellularia californica	2011	umbe	45401.24838	4134708.798
1	37.24576667	-122.1252	Umbellularia californica	2011	umbe	45288.54096	4134464.301
1	37.24668333	-122.1271167		2011	unk	45123.89665	4134575.343
1	37.24403333	-122.1279	Umbellularia californica	2011	umbe	45038.36818	4134284.818
1	37.2443	-122.1253833	Umbellularia californica	2011	umbe	45263.42442	4134302.301
1	37.39658	-122.29345	Umbellularia californica	2011	umbe	31290.99579	4152038.745
1	37.39658	-122.29345	Umbellularia californica	2011	umbe	31290.99579	4152038.745
1	37.38384	-122.26087	Umbellularia californica	2011	umbe	34098.81727	4150461.842
1	37.40182	-122.30122	Notholithocarpus densiflorus	2011	notho	30635.28375	4152659.502
1	37.39804	-122.288849	Umbellularia californica	2011	umbe	31707.81319	4152177.969
1	37.38438	-122.26131	Umbellularia californica	2011	umbe	34063.17542	4150523.996
1	37.24325	-122.15305	Umbellularia californica	2011	umbe	42800.63099	4134319.399
1	37.24343333	-122.1523667	Umbellularia californica	2011	umbe	42862.41108	4134336.449
1	37.24336667	-122.15165	Umbellularia californica	2011	umbe	42925.64148	4134325.573
1	37.24311667	-122.1514833	Umbellularia californica	2011	umbe	42938.92755	4134297.001
1	37.24148333	-122.1519167	Umbellularia californica	2011	umbe	42890.54872	4134117.705
1	37.24041667	-122.1504167	Umbellularia californica	2011	umbe	43017.2723	4133991.977
1	37.24126667	-122.1527		2011	unk	42819.68615	4134097.438
1	37.24275	-122.1516		2011	unk	42926.34405	4134256.845
1	37.37623	-122.26292	Umbellularia californica	2011	umbe	33869.8686	4149626.804
1	37.33285	-122.22968	Umbellularia californica	2011	umbe	36548.48926	4144644.695
1	37.33351	-122.22959	Umbellularia californica	2011	umbe	36560.5397	4144717.553
1	37.33343	-122.22895	Umbellularia californica	2011	umbe	36616.80431	4144705.517
1	37.33313	-122.23108	Umbellularia californica	2011	umbe	36426.0572	4144682.685
1	37.33733	-122.2246	Umbellularia californica	2011	umbe	37026.60067	4145117.257
1	37.32793	-122.16894	Umbellularia californica	2011	umbe	41905.15877	4143801.022
1	37.32453	-122.16322	Umbellularia californica	2011	umbe	42391.76637	4143395.609
1	37.33112	-122.16389	Umbellularia californica	2011	umbe	42372.44987	4144130.745
1	37.33073	-122.16949	Umbellularia californica	2011	umbe	41873.4404	4144114.665
1	37.33073	-122.16949	Notholithocarpus densiflorus	2011	notho	41873.4404	4144114.665
1	37.38366	-122.26316	Umbellularia californica	2011	umbe	33894.74706	4150453.199
1	37.38508	-122.26526	Umbellularia californica	2011	umbe	33717.45782	4150621.322
1	37.38223	-122.26296	Umbellularia californica	2011	umbe	33903.5896	4150293.386
0	37.4290667	-122.2583389	Umbellularia californica	2011	umbe	34603.96867	4155472.355
0	37.4394389	-122.2919194	Umbellularia californica	2011	umbe	31694.53739	4156791.257
0	37.2889389	-122.0854556	Umbellularia californica	2011	umbe	49075.55756	4139068.002
1	37.2889389	-122.0854556	Umbellularia californica	2011	umbe	49075.55756	4139068.002
1	37.28625	-122.17378	Umbellularia californica	2011	umbe	41221.87012	4139195.616
1	37.28682	-122.17216	Umbellularia californica	2011	umbe	41369.09703	4139251.035
1	37.28532	-122.17113		2011	unk	41451.36314	4139079.435
1	37.28365	-122.16946	Umbellularia californica	2011	umbe	41589.39256	4138885.842
1	37.28485	-122.16561		2011	unk	41938.34335	4139000.396
1	37.2835	-122.16347	Umbellularia californica	2011	umbe	42120.03821	4138840.069
1	37.28521	-122.16149	Umbellularia californica	2011	umbe	42306.13707	4139020.363
1	37.29135	-122.18309	Umbellularia californica	2011	umbe	40426.84502	4139807.38
0	37.4294056	-122.2543556	Umbellularia californica	2011	umbe	34958.87866	4155490.267
0	37.4282111	-122.2788472	Umbellularia californica	2011	umbe	32782.17587	4155479.135
0	37.4282111	-122.2788472	Umbellularia californica	2011	umbe	32782.17587	4155479.135
0	37.4282111	-122.2788472	Umbellularia californica	2011	umbe	32782.17587	4155479.135
1	37.36476667	-122.2158833	Umbellularia californica	2011	umbe	37968.35554	4148121.586
0	37.382375	-122.2411556	Umbellularia californica	2011	umbe	35836.94288	4150201.639
0	37.382375	-122.2411556	Umbellularia californica	2011	umbe	35836.94288	4150201.639
1	37.36515	-122.2169333	Umbellularia californica	2011	umbe	37877.63601	4148169.317
1	37.36585	-122.2167833	Umbellularia californica	2011	umbe	37895.24084	4148246.323
0	37.3727806	-122.2150528	Notholithocarpus densiflorus	2011	notho	38091.28291	4149007.548
0	37.43824444	-122.2015639		2011	unk	39688.95343	4156211.887
0	37.43824444	-122.2015639	Umbellularia californica	2011	umbe	39688.95343	4156211.887
1	37.43824444	-122.2023972	Umbellularia californica	2011	umbe	39615.15772	4156215.972
1	37.45043333	-122.2444333		2011	unk	35968.02503	4157776.6
0	37.44074722	-122.2386583		2011	unk	36419.40236	4156672.306
0	37.4325667	-122.2339722		2011	unk	36783.79374	4155740.632
0	37.43432222	-122.2416806	Umbellularia californica	2011	umbe	36111.96067	4155973.648
1	37.3822639	-122.2412944	Umbellularia californica	2011	umbe	35823.95431	4150189.985
1	37.3822639	-122.2412944	Umbellularia californica	2011	umbe	35823.95431	4150189.985
0	37.3822639	-122.2412944	Umbellularia californica	2011	umbe	35823.95431	4150189.985
1	37.3822639	-122.2412944	Umbellularia californica	2011	umbe	35823.95431	4150189.985
1	37.429101	-122.278923	Umbellularia californica	2011	umbe	32781.01241	4155578.348
0	37.428053	-122.277938	Umbellularia californica	2011	umbe	32861.72069	4155457.054
0	37.428053	-122.277938	Umbellularia californica	2011	umbe	32861.72069	4155457.054
0	37.424608	-122.278445	Umbellularia californica	2011	umbe	32795.33033	4155076.957
0	37.4434	-122.286	Umbellularia californica	2011	umbe	32243.5068	4157201.695
0	37.44258333	-122.2863	Umbellularia californica	2011	umbe	32211.83771	4157112.486
1	37.44238333	-122.2867833	Umbellularia californica	2011	umbe	32167.78875	4157092.68
1	37.4421	-122.28685	Umbellularia californica	2011	umbe	32160.11165	4157061.545
1	37.4415167	-122.2879833	Umbellularia californica	2011	umbe	32056.10458	4157002.407
0	37.4420167	-122.2888	Notholithocarpus densiflorus	2011	notho	31986.90489	4157062.01
0	37.44185	-122.2890333	Notholithocarpus densiflorus	2011	notho	31965.20247	4157044.658
1	37.4401667	-122.2897833	Umbellularia californica	2011	umbe	31888.26085	4156861.44
0	37.3662	-122.2022833	Umbellularia californica	2011	umbe	39182.73843	4148214.069
1	37.3679667	-122.20195		2011	unk	39223.12539	4148408.648
1	37.3684167	-122.20245	Umbellularia californica	2011	umbe	39181.56628	4148461.075
1	37.3651333	-122.2021333	Umbellularia californica	2011	umbe	39189.48891	4148094.865
0	37.463	-122.2077	Umbellularia californica	2011	umbe	39297.92935	4158991.371
1	37.3617	-122.2070667	Umbellularia californica	2011	umbe	38731.07676	4147737.735
0	37.3631167	-122.2073		2011	unk	38719.09687	4147896.219
0	37.3626	-122.2073167		2011	unk	38714.44258	4147838.915
0	37.39482	-122.217483	Umbellularia californica	2011	umbe	38011.58794	4151467.222
0	37.3805283	-122.194503	Umbellularia californica	2011	umbe	39960.23078	4149767.299
0	37.3779483	-122.216913	Umbellularia californica	2011	umbe	37958.21181	4149590.619
0	37.428957	-122.273409	Umbellularia californica	2011	umbe	33268.50127	4155534.943
0	37.429726	-122.273622	Umbellularia californica	2011	umbe	33254.42696	4155621.41
1	37.429791	-122.273332	Umbellularia californica	2011	umbe	33280.51758	4155627.188
0	37.430043	-122.273392	Umbellularia californica	2011	umbe	33276.77345	4155655.475
0	37.426759	-122.275303	Umbellularia californica	2011	umbe	33087.04628	4155300.235
0	37.430442	-122.277583	Umbellularia californica	2011	umbe	32908.06102	4155720.622
0	37.448191	-122.27146	Notholithocarpus densiflorus	2011	notho	33560.94857	4157661.476
0	37.448191	-122.27146	Notholithocarpus densiflorus	2011	notho	33560.94857	4157661.476
0	37.448191	-122.27146	Notholithocarpus densiflorus	2011	notho	33560.94857	4157661.476
0	37.3900972	-122.209375	Umbellularia californica	2011	umbe	38701.00041	4150902.889
0	37.38935	-122.2080361	Umbellularia californica	2011	umbe	38815.05509	4150813.336
0	37.3921583	-122.211694	Umbellularia californica	2011	umbe	38508.1793	4151143.178
0	37.391372	-122.2149527	Umbellularia californica	2011	umbe	38214.57373	4151071.85
1	37.313605	-122.1872083	Umbellularia californica	2011	umbe	40197.40141	4142299.116
0	37.38595	-122.240138	Umbellularia californica	2011	umbe	35949.23901	4150593.666
1	37.385205	-122.23984	Umbellularia californica	2011	umbe	35971.04095	4150509.454
1	37.3856861	-122.23991	Umbellularia californica	2011	umbe	35967.81272	4150563.232
0	37.38485	-122.23997	Umbellularia californica	2011	umbe	35957.32446	4150470.668
0	37.37078	-122.19281	Umbellularia californica	2011	umbe	40050.54676	4148676.366
0	37.37104	-122.19382	Umbellularia californica	2011	umbe	39962.61523	4148710.181
1	37.392859	-122.265776		2011	unk	33720.08051	4151487.849
1	37.39602	-122.24078	Umbellularia californica	2011	umbe	35954.64014	4151715.239
0	37.39602	-122.29028	Umbellularia californica	2011	umbe	31568.39589	4151960.747
0	37.36997	-122.19495	Umbellularia californica	2011	umbe	39855.89623	4148596.873
1	37.39311	-122.264311	Umbellularia californica	2011	umbe	33851.46097	4151508.46
1	37.393928	-122.266092	Umbellularia californica	2011	umbe	33698.72401	4151608.143
0	37.394337	-122.266239	Notholithocarpus densiflorus	2011	notho	33688.24061	4151654.298
1	37.393675	-122.265192	Umbellularia californica	2011	umbe	33776.90355	4151575.58
1	37.393798	-122.263888		2011	unk	33893.22023	4151582.775
0	37.3626	-122.212316	Umbellularia californica	2011	umbe	38271.26126	4147863.439
1	37.3626	-122.212316	Umbellularia californica	2011	umbe	38271.26126	4147863.439
0	37.3626	-122.212316	Umbellularia californica	2011	umbe	38271.26126	4147863.439
0	37.3626	-122.212316	Umbellularia californica	2011	umbe	38271.26126	4147863.439
0	37.3626	-122.212316	Umbellularia californica	2011	umbe	38271.26126	4147863.439
0	37.429111	-122.273465	Umbellularia californica	2011	umbe	33264.50075	4155552.325
0	37.429417	-122.273825	Umbellularia californica	2011	umbe	33234.52158	4155588.1
1	37.429676	-122.273504	Umbellularia californica	2011	umbe	33264.56681	4155615.27
0	37.429905	-122.273352	Umbellularia californica	2011	umbe	33279.45645	4155639.949
0	37.430637	-122.276718	Umbellularia californica	2011	umbe	32985.89023	4155737.979
0	37.426738	-122.275197	Umbellularia californica	2011	umbe	33096.30433	4155297.376
0	37.368016	-122.2129	Umbellularia californica	2011	umbe	38252.79642	4148467.814
0	37.368016	-122.2129	Umbellularia californica	2011	umbe	38252.79642	4148467.814
1	37.35652	-122.21185	Umbellularia californica	2011	umbe	38275.19473	4147185.898
1	37.354816	-122.21066	Umbellularia californica	2011	umbe	38370.22331	4146990.81
1	37.36176	-122.2136	Umbellularia californica	2011	umbe	38152.27024	4147776.449
0	37.359753	-122.214307	Umbellularia californica	2011	umbe	38077.25057	4147557.019
1	37.358552	-122.212437		2011	unk	38235.64624	4147414.455
0	37.3615	-122.210066	Umbellularia californica	2011	umbe	38463.96058	4147730.231
1	36.362665	-121.858016	Umbellularia californica	2010	umbe	64015.86014	4035148.337
1	36.458222	-121.87268	Umbellularia californica	2009	umbe	63235.82162	4045825.584
1	36.478249	-121.890133	Umbellularia californica	2010	umbe	61783.38936	4048128.884
1	36.495718	-121.883839	Umbellularia californica	2010	umbe	62446.37485	4050039.991
1	36.482453	-121.867305	Umbellularia californica	2010	umbe	63854.14861	4048491.818
1	36.470785	-121.886789	Umbellularia californica	2010	umbe	62041.14111	4047284.816
1	36.453172	-121.871265	Notholithocarpus densiflorus	2009	notho	63334.34785	4045258.395
1	36.340714	-121.802134	Notholithocarpus densiflorus	2009	notho	68913.1564	4032459.508
1	36.281225	-121.827359	Umbellularia californica	2010	umbe	66316.75903	4025967.04
1	36.298782	-121.828377	Umbellularia californica	2009	umbe	66322.70784	4027921.119
1	36.242404	-121.772632	Umbellularia californica	2009	umbe	71023.92904	4021412.039
1	36.247027	-121.701715	Notholithocarpus densiflorus	2010	notho	77427.44574	4021612.837
1	36.180421	-121.686039	Notholithocarpus densiflorus	2009	notho	78479.15145	4014149.043
1	36.179971	-121.680408	Umbellularia californica	2010	umbe	78983.60237	4014074.567
1	35.986837	-121.469594	Notholithocarpus densiflorus	2009	notho	96971.7815	3991736.441
1	35.952844	-121.435375	Notholithocarpus densiflorus	2010	notho	99887.33434	3987821.345
1	36.080584	-121.589594	Umbellularia californica	2010	umbe	86635.6624	4002648.787
1	36.045445	-121.570629	Umbellularia californica	2010	umbe	88161.27541	3998666.849
1	35.90407	-121.418377	Umbellularia californica	2010	umbe	101176.1619	3982336.877
1	36.472391	-121.851907	Notholithocarpus densiflorus	2010	notho	65178.50853	4047304.727
1	36.178802	-121.69244	Notholithocarpus densiflorus	2010	notho	77894.2635	4013997.184
1	35.93997	-121.450055	Notholithocarpus densiflorus	2010	notho	98496.93293	3986452.543
1	36.359223	-121.833278	Umbellularia californica	2010	umbe	66218.39402	4034654.47
1	36.366284	-121.840663	Umbellularia californica	2010	umbe	65594.49624	4035471.795
1	36.173023	-121.664527	Umbellularia californica	2010	umbe	80375.95333	4013234.158
1	36.172803	-121.669875	Umbellularia californica	2010	umbe	79893.34138	4013232.93
1	36.165679	-121.669478	Umbellularia californica	2010	umbe	79890.95052	4012440.228
1	36.033964	-121.549683	Umbellularia californica	2011	umbe	89990.17666	3997303.551
1	36.034909	-121.555516	Umbellularia californica	2011	umbe	89469.09158	3997433.108
1	36.040831	-121.562528	Umbellularia californica	2011	umbe	88867.64399	3998120.254
1	36.34997	-121.860143	Umbellularia californica	2011	umbe	63753.77868	4033748.306
1	36.483048	-121.860973	Umbellularia californica	2011	umbe	64425.28353	4048529.157
1	36.463099	-121.873165	Umbellularia californica	2011	umbe	63219.75663	4046369.338
1	36.44772	-121.867456	Umbellularia californica	2011	umbe	63645.40294	4044635.702
1	36.26419	-121.822919	Umbellularia californica	2011	umbe	66621.50105	4024055.564
1	36.296797	-121.824041	Umbellularia californica	2011	umbe	66701.42519	4027681.227
1	36.295126	-121.812474	Umbellularia californica	2011	umbe	67731.86871	4027443.802
1	36.239593	-121.746321	Umbellularia californica	2011	umbe	73375.14704	4020983.429
1	36.201372	-121.700159	Umbellularia californica	2011	umbe	77321.09132	4016536.867
1	36.205262	-121.694711	Umbellularia californica	2011	umbe	77832.30645	4016944.986
1	36.10488	-121.605672	Umbellularia californica	2011	umbe	85314.64496	4005414.917
1	35.975992	-121.45433	Umbellularia californica	2011	umbe	98293.91202	3990469.292
1	35.982238	-121.434104	Umbellularia californica	2011	umbe	100150.6863	3991079.374
1	35.959577	-121.457733	Umbellularia californica	2011	umbe	97903.38129	3988660.977
1	35.943285	-121.428154	Umbellularia californica	2011	umbe	100490.897	3986730.47
1	35.94048	-121.439829	Umbellularia californica	2011	umbe	99422.72503	3986467.04
1	35.923683	-121.43113	Umbellularia californica	2011	umbe	100123.2693	3984566.527
1	35.91347	-121.430747	Umbellularia californica	2011	umbe	100106.3143	3983431.136
1	35.890354	-121.434345	Umbellularia californica	2011	umbe	99664.67411	3980879.638
1	36.08803	-121.606808	Umbellularia californica	2011	umbe	85123.48177	4003548.976
1	36.342199	-121.808806	Umbellularia californica	2011	umbe	68322.01222	4032654.259
0	35.8256	-121.337541	Umbellularia californica	2011	umbe	108090.1085	3973297.937
0	35.833679	-121.340911	Umbellularia californica	2011	umbe	107825.2875	3974208.337
0	35.797871	-121.338022	Umbellularia californica	2011	umbe	107909.9882	3970221.616
0	36.031534	-121.517223	Umbellularia californica	2011	umbe	92904.76207	3996897.235
0	36.023475	-121.504683	Umbellularia californica	2011	umbe	93994.13649	3995950.033
0	36.02808	-121.499785	Umbellularia californica	2011	umbe	94459.53763	3996440.829
0	35.786791	-121.313467	Umbellularia californica	2011	umbe	110076.4549	3968893.359
0	36.029092	-121.511638	Umbellularia californica	2011	umbe	93395.82472	3996602.728
0	36.037207	-121.533627	Umbellularia californica	2011	umbe	91454.84812	3997595.941
0	36.484433	-121.880172	Umbellularia californica	2011	umbe	62711.5147	4048770.179
0	36.314668	-121.801281	Umbellularia californica	2011	umbe	68845.87434	4029563.611
0	36.249115	-121.776609	Umbellularia californica	2011	umbe	70703.03191	4022174.864
0	36.23129	-121.745159	Umbellularia californica	2011	umbe	73434.42975	4020056.382
0	36.189856	-121.656461	Notholithocarpus densiflorus	2011	notho	81191.93153	4015068.182
0	36.489198	-121.851468	Umbellularia californica	2011	umbe	65312.05962	4049169.002
0	36.355777	-121.791314	Notholithocarpus densiflorus	2011	notho	69968.2368	4034083.725
0	36.064612	-121.577559	Umbellularia californica	2011	umbe	87636.71355	4000824.282
0	35.856139	-121.387433	Umbellularia californica	2010	umbe	103731.7544	3976889.626
0	35.897823	-121.430767	Umbellularia californica	2010	umbe	100025.5705	3981694.134
0	36.028657	-121.490341	Umbellularia californica	2009	umbe	95314.17187	3996465.506
0	36.032794	-121.479702	Umbellularia californica	2009	umbe	96294.76939	3996880.531
0	36.013341	-121.50135	Umbellularia californica	2010	umbe	94242.64457	3994811.021
0	36.012468	-121.506749	Umbellularia californica	2010	umbe	93751.16895	3994736.655
0	36.060055	-121.546808	Umbellularia californica	2010	umbe	90384.99142	4000188.134
0	36.500639	-121.881165	Notholithocarpus densiflorus	2010	notho	62713.87161	4050574.25
0	36.496495	-121.863632	Umbellularia californica	2009	umbe	64262.41029	4050034.391
0	36.307379	-121.802991	Umbellularia californica	2010	umbe	68651.93715	4028761.905
0	36.329479	-121.798257	Notholithocarpus densiflorus	2010	notho	69199.39036	4031194.671
0	36.325781	-121.791971	Notholithocarpus densiflorus	2010	notho	69743.76664	4030755.989
0	36.324777	-121.784433	Notholithocarpus densiflorus	2010	notho	70415.52457	4030610.9
0	36.285991	-121.832849	Umbellularia californica	2009	umbe	65849.67273	4026520.932
0	36.291255	-121.809212	Umbellularia californica	2009	umbe	68003.67036	4026999.368
0	36.246215	-121.763445	Umbellularia californica	2009	umbe	71871.1034	4021794.444
0	36.243162	-121.756071	Umbellularia californica	2009	umbe	72517.64872	4021422.803
0	36.246882	-121.752567	Umbellularia californica	2010	umbe	72853.11543	4021820.355
0	36.253806	-121.739632	Notholithocarpus densiflorus	2010	notho	74054.17063	4022532.045
0	36.249476	-121.735971	Umbellularia californica	2010	umbe	74359.85352	4022035.131
0	36.237922	-121.753815	Umbellularia californica	2009	umbe	72691.95746	4020831.003
0	36.251928	-121.687658	Umbellularia californica	2010	umbe	78718.07443	4022095.615
0	36.249208	-121.681264	Umbellularia californica	2010	umbe	79278.46913	4021765.746
0	36.2561	-121.67085	Umbellularia californica	2010	umbe	80252.01123	4022485.673
0	36.248617	-121.653436	Umbellularia californica	2010	umbe	81777.97727	4021579.311
0	36.21323	-121.712133	Umbellularia californica	2009	umbe	76307.65811	4017905.883
0	36.166214	-121.66606	Notholithocarpus densiflorus	2009	notho	80201.5337	4012484.802
0	35.994758	-121.49095	Umbellularia californica	2010	umbe	95085.4535	3992704.554
0	36.001105	-121.456248	Umbellularia californica	2010	umbe	98248.51274	3993265.231
0	35.991416	-121.474706	Umbellularia californica	2009	umbe	96533.91355	3992265.998
0	36.33401	-121.788263	Notholithocarpus densiflorus	2010	notho	70122.27389	4031653.172
0	36.228079	-121.736187	Umbellularia californica	2009	umbe	74224.06503	4019660.292
0	36.333345	-121.794809	Notholithocarpus densiflorus	2010	notho	69530.51101	4031608.541
0	36.065138	-121.55527	Notholithocarpus densiflorus	2010	notho	89648.63564	4000788.211
0	36.059213	-121.564171	Umbellularia californica	2010	umbe	88815.37324	4000168.062
0	36.023676	-121.490725	Umbellularia californica	2009	umbe	95253.99754	3995914.111
0	36.015754	-121.521473	Umbellularia californica	2009	umbe	92440.02332	3995163.125
0	36.018923	-121.528054	Umbellularia californica	2010	umbe	91862.82197	3995542.577
0	36.347591	-121.807251	Umbellularia californica	2010	umbe	68491.54115	4033246.012
0	36.162602	-121.662861	Notholithocarpus densiflorus	2009	notho	80470.23428	4012069.895
0	36.028792	-121.506401	Umbellularia californica	2011	umbe	93866.55851	3996547.515
0	36.108564	-121.59897	Umbellularia californica	2011	umbe	85937.86672	4005795.294
0	35.887441	-121.407623	Umbellularia californica	2011	umbe	102064.0402	3980446.834
0	36.085984	-121.598943	Umbellularia californica	2011	umbe	85821.48752	4003288.204
0	36.322488	-121.800578	Notholithocarpus densiflorus	2011	notho	68952.23925	4030428.782
0	36.24245	-121.778505	Umbellularia californica	2009	umbe	70495.93171	4021443.237
1	40.123305	-123.839945	Notholithocarpus densiflorus	2008	notho	-83039.3116	4463928.675
1	40.215322	-123.784114	Umbellularia californica	2008	umbe	-77491.83449	4473787.268
1	40.122298	-123.842235	Notholithocarpus densiflorus	2008	notho	-83243.32117	4463831.875
0	41.227875	-123.966475	Notholithocarpus densiflorus	2008	notho	-84057.83314	4587517.109
0	41.253987	-123.987578	Sequoia sempervirens	2008	other	-85593.75733	4590561.497
0	41.256734	-123.986841	Notholithocarpus densiflorus	2008	notho	-85507.28499	4590861.752
0	41.261428	-123.987649	Sequoia sempervirens	2008	other	-85532.87834	4591388.83
0	40.113852	-123.842873	Notholithocarpus densiflorus	2008	notho	-83370.32616	4462897.512
0	40.00745	-123.956802	Umbellularia californica	2008	umbe	-94019.62804	4451830.869
0	40.006975	-123.953883	Notholithocarpus densiflorus	2008	notho	-93774.31257	4451758.517
0	40.008849	-123.953872	Umbellularia californica	2008	umbe	-93757.04183	4451966.703
0	40.007831	-123.947268	Umbellularia californica	2008	umbe	-93201.54622	4451809.338
0	40.006082	-123.944227	Umbellularia californica	2008	umbe	-92956.88754	4451594.616
0	40.016515	-123.936824	Umbellularia californica	2008	umbe	-92233.52782	4452704.531
0	39.728334	-123.640766	Notholithocarpus densiflorus	2008	notho	-69327.78582	4418745.434
0	39.745607	-123.637448	Umbellularia californica	2008	umbe	-68900.30886	4420643.645
0	39.72326	-123.649225	Umbellularia californica	2008	umbe	-70095.59601	4418235.649
0	39.731948	-123.633996	Notholithocarpus densiflorus	2008	notho	-68717.05157	4419103.82
0	41.377924	-123.998585	Vaccinium ovatum	2008	other	-85400.57229	4604408.136
0	41.789169	-124.082816	Notholithocarpus densiflorus	2008	notho	-88681.85493	4650681.481
0	41.206944	-123.994662	Notholithocarpus densiflorus	2008	notho	-86610.5381	4585382.045
0	41.326523	-124.013625	Sequoia sempervirens	2008	other	-87123.65356	4598798.673
0	41.326324	-123.979556	Notholithocarpus densiflorus	2008	notho	-84271.68049	4598545.282
0	41.29033	-124.027506	Umbellularia californica	2008	umbe	-88613.67102	4594871.403
0	41.296594	-124.029479	Umbellularia californica	2008	umbe	-88722.38968	4595580.925
0	41.817114	-124.110616	Notholithocarpus densiflorus	2008	notho	-90735.51302	4653978.511
0	41.696189	-124.116803	Sequoia sempervirens	2008	other	-92367.12557	4640584.164
0	41.700913	-124.118916	Notholithocarpus densiflorus	2008	notho	-92499.49075	4641123.714
0	41.698345	-124.106	Sequoia sempervirens	2008	other	-91447.54952	4640749.072
0	41.648965	-124.115423	Sequoia sempervirens	2008	other	-92687.73506	4635327.065
0	41.702097	-124.094959	Sequoia sempervirens	2008	other	-90493.53104	4641089.799
0	41.671381	-124.112957	Sequoia sempervirens	2008	other	-92275.58857	4637800.896
0	41.77894	-124.092884	Tsuga heterophylla	2008	other	-89613.35874	4649614.225
0	41.820576	-124.109197	Umbellularia californica	2008	umbe	-90585.56742	4654353.394
0	41.392808	-124.025636	Sequoia sempervirens	2008	other	-87529.91459	4606246.149
0	41.390445	-124.02097	Sequoia sempervirens	2008	other	-87160.8542	4605951.764
0	41.365404	-124.018426	Umbellularia californica	2008	umbe	-87174.41991	4603151.856
0	41.671741	-124.110459	Sequoia sempervirens	2008	other	-92064.14793	4637823.635
0	41.200936	-123.946365	Umbellularia californica	2008	umbe	-82611.07854	4584387.976
0	41.20007	-123.948158	Umbellularia californica	2008	umbe	-82769.2835	4584303.824
0	41.208438	-124.012413	Umbellularia californica	2008	umbe	-88086.74635	4585668.623
0	41.210724	-124.010793	Umbellularia californica	2008	umbe	-87930.21763	4585911.633
0	41.222018	-124.001638	Sequoia sempervirens	2008	other	-87060.41385	4587104.439
0	41.305474	-124.019697	Sequoia sempervirens	2008	other	-87822.42494	4596501.018
0	41.292961	-124.007814	Vaccinium ovatum	2008	other	-86939.53438	4595029.697
0	41.136769	-123.901881	Notholithocarpus densiflorus	2008	notho	-79445.8898	4576959.133
0	40.025094	-123.794514	Umbellularia californica	2008	umbe	-80000.83999	4452716.421
0	40.020551	-123.795857	Notholithocarpus densiflorus	2008	notho	-80154.26562	4452220.372
0	40.019303	-123.79084	Umbellularia californica	2008	umbe	-79736.24604	4452048.852
0	40.021017	-123.792343	Umbellularia californica	2008	umbe	-79850.07186	4452249.154
0	39.897123	-123.751207	Notholithocarpus densiflorus	2008	notho	-77382.32105	4438213.199
0	39.901771	-123.75428	Notholithocarpus densiflorus	2008	notho	-77606.10749	4438749.682
0	39.876577	-123.725173	Umbellularia californica	2008	umbe	-75326.669	4435761.188
0	39.875893	-123.731548	Umbellularia californica	2008	umbe	-75878.23419	4435726.465
0	40.350452	-123.965054	Notholithocarpus densiflorus	2008	notho	-91720.34618	4490004.148
[truncated: 17,212 more rows]
