# Supplementary material
Source: MDPI journal article supplement (https://www.mdpi.com/1999-4907/8/8/293)
Supplement: s1 [file s1 › DATASET S4.csv]

switch	xmed	ymed	fy	ly	sp
4	77427.40662	4021612.866	2010	2013	tanoak
4	99890.37377	3987816.384	2010	2013	tanoak
4	65178.46958	4047304.757	2010	2013	tanoak
4	77894.25954	4013997.195	2010	2013	tanoak
4	98496.93445	3986452.577	2010	2013	tanoak
2	62714.06605	4050574.273	2010	2013	tanoak
2	74054.13575	4022532.068	2010	2013	tanoak
1	70122.24299	4031653.185	2010	2013	tanoak
1	89648.6099	4000788.24	2010	2013	tanoak
1	30761.6837	4151008.954	2010	2012	tanoak
1	30737.36165	4151104.257	2010	2011	tanoak
1	30774.77165	4151089.727	2009	2010	tanoak
2	28350.09526	4157867.926	2010	2012	tanoak
2	28310.36673	4157970.47	2009	2012	tanoak
1	28419.90472	4157885.757	2009	2010	tanoak
2	28184.22554	4157872.944	2008	2012	tanoak
4	28414.91044	4157813.893	2011	2012	tanoak
1	28316.61606	4157813.452	2008	2012	tanoak
2	-41109.73332	4288644.303	2008	2011	tanoak
1	-39331.75301	4285904.028	2010	2013	tanoak
3	-39585.85245	4285349.121	2008	2010	tanoak
1	-19853.73515	4289491.213	2010	2011	tanoak
1	-39630.9782	4285382.363	2011	2012	tanoak
4	-101763.9087	4682158.591	2008	2013	tanoak
4	-101819.6893	4686145.376	2008	2009	tanoak
1	37822.95088	4204656.548	2010	2011	tanoak
1	-82928.18889	4475496.044	2008	2011	tanoak
2	-81073.77145	4478803.931	2008	2010	tanoak
2	-81371.09209	4478996.246	2008	2012	tanoak
1	-81613.41505	4478948.979	2008	2011	tanoak
2	-82151.40424	4479276.251	2008	2011	tanoak
3	-81382.75564	4478319.406	2008	2014	tanoak
1	-82997.23533	4476264.622	2008	2011	tanoak
1	-86782.79815	4465361.002	2008	2011	tanoak
1	-86733.62014	4465403.142	2008	2012	tanoak
4	-81510.39451	4478885.28	2010	2012	tanoak
1	-77741.08384	4567236.31	2010	2012	tanoak
1	-78771.0738	4565919.588	2010	2011	tanoak
2	-78187.36903	4566822.298	2010	2011	tanoak
1	-98075.95554	4453662.049	2010	2012	tanoak
1	-81373.27247	4479027.088	2010	2012	tanoak
3	-82527.0746	4459907.743	2010	2012	tanoak
2	-84806.00542	4466934.596	2010	2013	tanoak
4	-78048.91534	4566743.118	2011	2012	tanoak
2	-78178.60937	4566708.717	2011	2012	tanoak
1	-77928.10562	4566015.333	2011	2012	tanoak
4	-81421.90491	4479170.287	2011	2012	tanoak
1	-85560.83048	4504769.821	2011	2013	tanoak
1	-81727.56336	4479034.068	2011	2012	tanoak
4	-81603.08496	4479178.884	2011	2012	tanoak
1	-81434.9906	4479000.086	2011	2012	tanoak
1	-82079.89757	4460142.805	2011	2012	tanoak
1	-79010.61751	4472939.651	2011	2012	tanoak
4	-59829.77378	4344794.591	2011	2013	tanoak
4	-59784.26029	4344719.776	2011	2013	tanoak
1	-44492.42587	4336604.147	2011	2012	tanoak
1	-44360.92871	4336600.138	2011	2013	tanoak
1	-24337.54973	4278270.06	2011	2012	tanoak
2	-79134.51395	4565750.441	2012	2013	tanoak
1	-76128.30859	4568510.205	2012	2013	tanoak
1	-76227.96796	4567616.677	2012	2013	tanoak
1	-75998.78808	4568134.417	2012	2013	tanoak
1	-76221.99618	4567540.453	2012	2013	tanoak
1	-77807.57292	4564948.229	2012	2013	tanoak
1	-78115.31611	4564871.36	2012	2013	tanoak
1	-78274.70008	4564749.517	2012	2013	tanoak
1	-76176.3129	4566949.043	2012	2014	tanoak
1	-91034.30176	4472097.74	2012	2014	tanoak
4	-77218.20985	4566841.05	2012	2013	tanoak
3	-78523.92219	4567136.92	2012	2013	tanoak
1	-97845.31621	4488873.747	2012	2013	tanoak
4	-80460.59969	4477396.546	2012	2013	tanoak
1	-44375.45116	4336628.925	2012	2013	tanoak
1	-14709.70457	4233900.878	2013	2015	tanoak
2	-81492.8482	4396017.138	2012	2013	tanoak
1	-81435.10859	4395979.005	2012	2013	tanoak
1	-78911.23498	4472960.739	2013	2014	tanoak
1	-76135.06669	4568572.565	2013	2014	tanoak
4	-76236.91271	4568587.91	2013	2014	tanoak
4	-56385.06863	4474288.623	2013	2014	tanoak
4	-56512.60736	4474267.655	2013	2014	tanoak
4	-56508.76579	4474215.136	2013	2014	tanoak
1	-56280.65867	4474244.551	2013	2014	tanoak
4	-98576.73352	4690712.678	2012	2013	tanoak
4	-98384.52298	4684872.311	2012	2013	tanoak
4	-100789.8872	4692847.116	2011	2013	tanoak
4	-102363.3364	4685245.516	2011	2012	tanoak
4	-98614.52081	4690731.942	2011	2012	tanoak
2	21796.75021	4265414.686	2008	2011	oak
2	8027.645576	4216227.553	2009	2010	oak
3	18983.1103	4220468.659	2008	2010	oak
2	18241.73751	4220465.09	2008	2010	oak
2	18181.29413	4220396.211	2008	2009	oak
1	41193.88867	4143765.423	2008	2011	oak
1	38850.29227	4142750.61	2010	2011	oak
2	41271.97058	4143660.564	2008	2012	oak
1	41197.90478	4143820.227	2008	2010	oak
1	41381.20036	4143837.276	2008	2009	oak
1	41304.29654	4143845.382	2008	2009	oak
1	41255.277	4143793.475	2008	2009	oak
1	18317.40009	4193979.95	2013	2015	oak
3	53686.77969	4134005.817	2011	2014	bay laurel
1	42401.84531	4159138.694	2011	2012	bay laurel
1	42182.86169	4159138.336	2011	2012	bay laurel
1	42062.09093	4159042.015	2011	2013	bay laurel
1	41203.37974	4158702.23	2011	2013	bay laurel
1	41165.81113	4158663.114	2011	2013	bay laurel
1	72836.23055	4050363.141	2011	2013	bay laurel
3	73247.36481	4048125.47	2011	2014	bay laurel
4	73301.5254	4048082.644	2011	2015	bay laurel
4	72441.47871	4050755.93	2011	2015	bay laurel
3	73373.14597	4047950.681	2011	2014	bay laurel
4	73196.77854	4047637.511	2011	2014	bay laurel
1	47115.89555	4190881.145	2010	2011	bay laurel
1	46884.09825	4190834.113	2010	2011	bay laurel
1	44944.55969	4207845.508	2011	2015	bay laurel
3	45089.887	4203726.343	2011	2012	bay laurel
1	36948.49886	4204514.923	2008	2011	bay laurel
1	36733.41553	4204523.306	2008	2014	bay laurel
2	47236.21495	4191421.052	2011	2013	bay laurel
2	42118.45663	4198160.702	2011	2015	bay laurel
1	39280.72465	4203423.274	2011	2014	bay laurel
2	39229.25602	4203436.283	2011	2014	bay laurel
1	39283.25789	4203478.979	2011	2014	bay laurel
2	39056.06569	4203376.993	2011	2013	bay laurel
2	41091.46948	4198123.88	2011	2012	bay laurel
1	41502.35705	4198470.845	2011	2012	bay laurel
1	40977.42899	4197806.555	2011	2012	bay laurel
1	37056.2359	4207995.673	2011	2012	bay laurel
2	37718.84277	4207408.42	2011	2015	bay laurel
4	38024.54361	4207191.834	2011	2015	bay laurel
1	42592.27252	4198841.656	2011	2012	bay laurel
1	35310.15079	4207832.279	2011	2015	bay laurel
1	35360.80336	4207837.049	2011	2015	bay laurel
1	35483.01361	4207892.182	2011	2013	bay laurel
2	35492.70674	4207928.694	2011	2013	bay laurel
1	34816.47563	4210711.018	2011	2013	bay laurel
2	35070.64915	4210708.812	2011	2015	bay laurel
1	33843.80209	4210713.023	2011	2012	bay laurel
1	44586.7819	4195546.282	2011	2013	bay laurel
1	37456.97903	4204579.318	2011	2015	bay laurel
1	37476.17245	4204606.289	2011	2015	bay laurel
1	37515.4138	4204623.857	2011	2015	bay laurel
1	37591.39662	4204682.645	2008	2011	bay laurel
1	37166.59393	4204924.422	2011	2014	bay laurel
1	37176.02129	4204879.711	2010	2011	bay laurel
2	43512.18782	4199814.29	2011	2012	bay laurel
1	35541.3441	4207946.73	2011	2014	bay laurel
1	35725.07053	4207940.945	2011	2013	bay laurel
1	35340.41211	4209341.206	2011	2015	bay laurel
1	35310.5601	4209324.025	2011	2015	bay laurel
1	35216.19284	4209413.152	2011	2015	bay laurel
1	35224.51699	4209476.531	2011	2015	bay laurel
1	35321.7084	4209494.541	2011	2013	bay laurel
2	38270.44653	4206336.779	2011	2015	bay laurel
3	38391.81656	4206562.161	2011	2015	bay laurel
1	37269.75418	4206761.856	2011	2013	bay laurel
4	37345.00022	4206867.309	2011	2013	bay laurel
1	37198.56864	4206865.009	2011	2012	bay laurel
1	36212.09593	4207282.287	2011	2015	bay laurel
1	36277.18275	4207377.284	2011	2013	bay laurel
1	36273.59043	4207356.713	2011	2015	bay laurel
1	36263.09635	4207274.317	2011	2015	bay laurel
1	36308.36534	4207219.878	2011	2015	bay laurel
2	39698.5993	4203654.187	2011	2012	bay laurel
1	48029.53588	4191124.598	2008	2011	bay laurel
1	34005.52241	4210663.304	2011	2015	bay laurel
1	34030.90206	4210808.02	2011	2015	bay laurel
1	36452.02909	4206069.325	2011	2014	bay laurel
3	38221.70309	4206485.432	2011	2015	bay laurel
4	37522.8942	4206021.976	2011	2014	bay laurel
1	39175.23738	4204876.032	2010	2011	bay laurel
1	38868.88078	4204631.197	2011	2014	bay laurel
2	39021.04551	4204652.405	2011	2012	bay laurel
1	39152.63181	4204628.452	2011	2015	bay laurel
1	39214.03159	4204614.914	2011	2012	bay laurel
1	46909.44529	4144898.2	2011	2013	bay laurel
1	43556.73334	4148991.852	2010	2014	bay laurel
1	43521.43829	4148944.39	2010	2011	bay laurel
1	43492.62608	4149011.299	2010	2014	bay laurel
1	42225.99369	4148108.988	2009	2011	bay laurel
3	43088.05097	4147015.87	2011	2013	bay laurel
3	43011.24591	4147008.678	2009	2011	bay laurel
1	43557.27568	4147817.374	2010	2012	bay laurel
1	43574.83153	4146712.695	2011	2013	bay laurel
1	43567.01773	4146655.199	2011	2013	bay laurel
2	43543.10246	4146614.921	2011	2012	bay laurel
1	43546.84349	4146547.474	2010	2015	bay laurel
1	43439.72317	4146643.227	2011	2013	bay laurel
1	46521.04721	4148589.215	2009	2013	bay laurel
1	46586.96358	4148599.583	2011	2013	bay laurel
1	46559.19947	4148869.013	2011	2013	bay laurel
2	43344.91606	4147286.746	2011	2015	bay laurel
1	42839.62591	4146673.748	2010	2011	bay laurel
1	42606.35746	4147005.108	2009	2015	bay laurel
1	42586.88421	4146968.534	2011	2015	bay laurel
3	42520.00433	4146956.161	2011	2014	bay laurel
4	14975.36962	4218679.687	2011	2014	bay laurel
4	12971.86913	4225747.895	2011	2013	bay laurel
4	14443.96469	4231541.497	2011	2015	bay laurel
3	15136.66192	4218483.297	2011	2014	bay laurel
3	15097.15623	4218408.676	2011	2014	bay laurel
2	15096.42456	4218450.223	2010	2014	bay laurel
4	14402.82058	4218391.062	2011	2012	bay laurel
3	28666.83349	4257352.618	2011	2015	bay laurel
1	33053.42767	4253126.966	2011	2013	bay laurel
4	32768.15689	4254382.017	2011	2012	bay laurel
4	42774.02377	4137764.577	2011	2012	bay laurel
4	42848.60806	4137826.278	2011	2012	bay laurel
4	42342.64736	4138400.867	2011	2012	bay laurel
4	42464.18271	4138984.091	2011	2012	bay laurel
4	43030.94531	4138015.947	2011	2012	bay laurel
4	42526.4019	4137604.621	2011	2012	bay laurel
4	42581.00827	4137646.025	2011	2012	bay laurel
3	40329.76718	4139833.138	2011	2013	bay laurel
4	40296.48606	4139929.283	2011	2014	bay laurel
4	41206.37537	4138410.027	2011	2012	bay laurel
4	50019.66064	4129612.944	2011	2012	bay laurel
4	50414.83064	4129711.298	2011	2014	bay laurel
4	50203.82945	4130441.897	2011	2014	bay laurel
1	-12136.91444	4282409.745	2011	2013	bay laurel
2	-12667.03936	4282327.917	2011	2012	bay laurel
1	-12313.94795	4282342.55	2011	2013	bay laurel
1	-12578.8135	4282288.227	2011	2014	bay laurel
1	-12398.39397	4282144.555	2011	2013	bay laurel
1	8322.962451	4277802.785	2011	2014	bay laurel
1	8230.638206	4277734.255	2011	2013	bay laurel
1	8284.111913	4277822.196	2011	2014	bay laurel
1	4391.251263	4271225.085	2011	2013	bay laurel
1	2120.47475	4275216.539	2010	2011	bay laurel
4	4284.748048	4266978.936	2011	2014	bay laurel
1	6120.22825	4271997.003	2011	2012	bay laurel
1	1887.350985	4277160.251	2011	2013	bay laurel
3	1982.191471	4277086.044	2011	2013	bay laurel
4	15514.10201	4253608.151	2011	2012	bay laurel
1	18604.47578	4257803.825	2011	2012	bay laurel
1	18839.36611	4257099.202	2011	2012	bay laurel
1	-10915.21319	4263748.011	2010	2014	bay laurel
1	-7912.632488	4290163.304	2011	2015	bay laurel
2	2322.339385	4300867.378	2011	2013	bay laurel
2	19452.60638	4261029.896	2011	2014	bay laurel
1	49379.61715	4131172.12	2011	2012	bay laurel
4	49377.09051	4131217.92	2011	2012	bay laurel
4	49294.45474	4131229.935	2011	2012	bay laurel
4	40247.90606	4140130.239	2011	2013	bay laurel
4	40178.31464	4140186.422	2011	2014	bay laurel
4	38685.40365	4144495.345	2011	2012	bay laurel
4	38699.63317	4144612.012	2011	2014	bay laurel
3	47823.54003	4131318.912	2011	2014	bay laurel
4	40672.25252	4139349.431	2011	2012	bay laurel
4	40801.60054	4139233.161	2011	2013	bay laurel
4	41154.32588	4138872.937	2011	2012	bay laurel
4	40456.19977	4140146.358	2011	2012	bay laurel
4	40294.78439	4140351.567	2011	2012	bay laurel
4	48986.20919	4131770.207	2011	2012	bay laurel
4	52744.05682	4129631.787	2011	2013	bay laurel
4	47801.61742	4131228.949	2011	2012	bay laurel
4	47718.63873	4131039.254	2011	2012	bay laurel
4	50584.02274	4130444.096	2011	2015	bay laurel
4	50727.26519	4129038.391	2011	2012	bay laurel
2	49706.55668	4129389.547	2011	2012	bay laurel
4	50384.97667	4129680.6	2011	2014	bay laurel
4	42802.85069	4134319.278	2011	2015	bay laurel
3	42860.92266	4134336.344	2011	2014	bay laurel
3	42906.23333	4134328.934	2011	2015	bay laurel
3	42960.39334	4134296.015	2011	2015	bay laurel
3	42887.08497	4134115.388	2011	2015	bay laurel
3	43018.02379	4133992.122	2011	2014	bay laurel
3	41369.09703	4139251.035	2011	2012	bay laurel
4	42117.59466	4138827.949	2011	2014	bay laurel
1	34952.63824	4155477.491	2011	2014	bay laurel
4	37897.54788	4148154.288	2008	2011	bay laurel
1	32219.08253	4157206.583	2010	2011	bay laurel
1	32216.47366	4157115.937	2011	2013	bay laurel
4	32063.37706	4157000.137	2011	2013	bay laurel
4	39180.87716	4148462.039	2008	2011	bay laurel
4	35951.60372	4150508.102	2011	2012	bay laurel
2	35976.36334	4150452.997	2010	2012	bay laurel
4	64015.85311	4035148.376	2010	2013	bay laurel
4	61783.35994	4048128.925	2010	2013	bay laurel
4	62446.34153	4050040.043	2010	2013	bay laurel
4	63854.1105	4048491.864	2010	2013	bay laurel
4	62041.13299	4047284.833	2010	2013	bay laurel
4	66316.74554	4025967.041	2010	2013	bay laurel
4	86635.63667	4002648.816	2010	2013	bay laurel
4	101176.1281	3982336.929	2010	2013	bay laurel
4	80375.94116	4013234.187	2010	2013	bay laurel
3	63753.77714	4033748.275	2011	2014	bay laurel
4	63219.71774	4046369.281	2011	2014	bay laurel
3	63645.36847	4044635.643	2011	2014	bay laurel
4	66621.46639	4024055.502	2011	2014	bay laurel
4	66702.47748	4027690.656	2011	2014	bay laurel
4	73375.10501	4020983.308	2011	2014	bay laurel
3	77832.26383	4016944.851	2011	2014	bay laurel
4	85314.596	4005414.741	2011	2014	bay laurel
4	98293.87189	3990469.008	2011	2014	bay laurel
4	100150.6515	3991079.108	2011	2014	bay laurel
4	97903.32939	3988660.732	2011	2014	bay laurel
3	100490.883	3986730.163	2011	2014	bay laurel
4	99422.69548	3986466.789	2011	2014	bay laurel
4	100123.216	3984566.25	2011	2014	bay laurel
4	100106.2697	3983430.852	2011	2014	bay laurel
4	85123.42973	4003548.831	2011	2014	bay laurel
1	108090.07	3973297.581	2011	2014	bay laurel
1	107825.263	3974207.989	2011	2014	bay laurel
1	107909.9628	3970221.248	2011	2014	bay laurel
1	92904.75271	3996897.034	2011	2014	bay laurel
1	93994.12077	3995949.791	2011	2014	bay laurel
1	110076.4345	3968893.001	2011	2014	bay laurel
1	93395.79195	3996602.509	2011	2014	bay laurel
1	62711.46733	4048770.131	2011	2014	bay laurel
1	68845.84344	4029563.533	2011	2014	bay laurel
1	70702.99508	4022174.758	2011	2014	bay laurel
1	73434.41116	4020056.279	2011	2014	bay laurel
1	65312.05174	4049168.935	2011	2014	bay laurel
2	87636.68595	4000824.08	2011	2014	bay laurel
1	103732.0803	3976890.228	2010	2013	bay laurel
2	100025.5544	3981694.18	2010	2013	bay laurel
1	94242.61326	3994811.028	2010	2013	bay laurel
1	93751.16573	3994736.683	2010	2013	bay laurel
1	72517.64532	4021422.826	2009	2013	bay laurel
1	80252.00042	4022485.729	2010	2013	bay laurel
1	95085.44022	3992704.56	2010	2013	bay laurel
2	98248.50899	3993265.247	2010	2013	bay laurel
1	88815.36475	4000168.073	2010	2013	bay laurel
1	91862.79698	3995542.623	2010	2013	bay laurel
2	85937.81807	4005795.125	2011	2014	bay laurel
1	102063.9999	3980446.544	2011	2014	bay laurel
2	85821.47586	4003288.053	2011	2014	bay laurel
1	-87182.42545	4603145.382	2008	2009	bay laurel
1	46841.42799	4190678.137	2010	2011	bay laurel
1	47235.5073	4190867.413	2010	2011	bay laurel
1	71085.17631	4042590.626	2008	2015	bay laurel
1	70932.03801	4046157.605	2008	2015	bay laurel
1	71914.34316	4042805.47	2008	2015	bay laurel
1	70244.33969	4045627.231	2008	2015	bay laurel
1	65421.30976	4051033.949	2008	2015	bay laurel
1	71634.24493	4043142.17	2008	2015	bay laurel
1	67991.10143	4044570.56	2008	2015	bay laurel
1	71255.39715	4042214.841	2008	2015	bay laurel
2	71085.38354	4042487.652	2008	2014	bay laurel
1	71604.73684	4044991.396	2008	2015	bay laurel
1	70873.34812	4046212.128	2008	2013	bay laurel
1	70405.33441	4045607.631	2008	2015	bay laurel
3	71098.39591	4042404.45	2008	2013	bay laurel
1	71194.40595	4042293.006	2008	2014	bay laurel
1	70605.61331	4042177.461	2008	2015	bay laurel
2	66208.10089	4047054.817	2008	2015	bay laurel
2	66961.43579	4046516.858	2008	2014	bay laurel
1	66003.08003	4047493.317	2008	2015	bay laurel
2	66360.65989	4047006.819	2008	2014	bay laurel
1	68183.27027	4044628.84	2008	2014	bay laurel
1	71076.71217	4042784.172	2008	2013	bay laurel
1	71208.36358	4043042.365	2008	2014	bay laurel
2	68012.7809	4044478.472	2008	2015	bay laurel
1	65453.06385	4050976.684	2008	2014	bay laurel
1	71168.93704	4042819.104	2008	2012	bay laurel
3	63966.16371	4049397.203	2008	2013	bay laurel
1	70783.02393	4042235.721	2008	2015	bay laurel
4	67323.28802	4046454.994	2008	2015	bay laurel
4	64020.79015	4049277.081	2008	2015	bay laurel
1	72709.59939	4042538.987	2008	2015	bay laurel
1	72494.46457	4042653.715	2008	2015	bay laurel
1	73433.19854	4041990.807	2008	2015	bay laurel
1	74512.49338	4041558.916	2008	2015	bay laurel
1	73168.0997	4042231.351	2008	2015	bay laurel
3	73260.29597	4042112.516	2008	2015	bay laurel
1	73530.60529	4041907.337	2008	2015	bay laurel
1	66145.30881	4045617.837	2008	2015	bay laurel
2	66249.23572	4045669.481	2008	2015	bay laurel
1	66111.59007	4045768.88	2008	2015	bay laurel
2	66416.90398	4046739.713	2008	2015	bay laurel
4	67762.33377	4046485.786	2008	2015	bay laurel
4	66224.42886	4045508.517	2008	2015	bay laurel
3	70998.05704	4042222.618	2008	2015	bay laurel
3	64980.81303	4048575.582	2008	2015	bay laurel
3	65558.54598	4047722.668	2008	2015	bay laurel
1	65945.0289	4047193.306	2008	2014	bay laurel
3	65696.32337	4047407.804	2008	2014	bay laurel
2	64271.42056	4049064.288	2008	2015	bay laurel
1	65299.16359	4048007.658	2008	2014	bay laurel
2	64128.07636	4049163.608	2008	2015	bay laurel
1	38749.12771	4147964.923	2008	2012	bay laurel
2	37902.10316	4148116.433	2008	2013	bay laurel
1	36259.6758	4153073.127	2008	2014	bay laurel
1	33185.90417	4160324.683	2008	2014	bay laurel
1	38002.47747	4150284.918	2008	2009	bay laurel
1	37106.18564	4150383.49	2008	2009	bay laurel
1	36685.28022	4151180.037	2008	2009	bay laurel
4	31922.88845	4157215.203	2008	2013	bay laurel
1	18842.12567	4194324.4	2008	2014	bay laurel
1	18656.96097	4194307.047	2008	2015	bay laurel
1	18609.88689	4194294.563	2008	2015	bay laurel
1	18655.05509	4194351.328	2008	2015	bay laurel
1	18701.49361	4194337.448	2008	2015	bay laurel
1	36813.93541	4204579.72	2008	2014	bay laurel
4	43318.60097	4200881.042	2008	2015	bay laurel
3	46989.98593	4210375.199	2008	2013	bay laurel
2	43135.93879	4146894.509	2009	2015	bay laurel
1	43911.84544	4146609.894	2009	2012	bay laurel
1	43726.39695	4146742.012	2009	2012	bay laurel
1	42363.84173	4147098.486	2009	2014	bay laurel
1	44807.74823	4146335.385	2009	2013	bay laurel
1	44526.34754	4146361.643	2009	2013	bay laurel
1	44944.82244	4146662.289	2009	2013	bay laurel
1	45531.64643	4147641.225	2009	2013	bay laurel
1	46875.46988	4145703.518	2009	2013	bay laurel
1	43869.3258	4149614.23	2009	2010	bay laurel
1	43215.65675	4148481.126	2009	2012	bay laurel
1	43161.45037	4148466.971	2009	2012	bay laurel
4	43142.87391	4148543.557	2009	2013	bay laurel
1	42975.51454	4148893.076	2009	2013	bay laurel
1	43130.30292	4148359.308	2009	2012	bay laurel
1	42225.76324	4148629.507	2009	2012	bay laurel
1	42886.94819	4151208.419	2009	2012	bay laurel
3	44240.55924	4147743.566	2009	2013	bay laurel
1	44924.24464	4147590.375	2009	2013	bay laurel
1	49379.4026	4146714.817	2009	2013	bay laurel
1	49349.15768	4146841.035	2009	2013	bay laurel
1	43734.32297	4147976.342	2009	2010	bay laurel
3	36154.22318	4157034.035	2009	2015	bay laurel
1	35949.75364	4157317.936	2009	2010	bay laurel
1	36033.74596	4157471.199	2009	2010	bay laurel
1	33798.50213	4153923.555	2009	2013	bay laurel
1	36072.93015	4157039.557	2009	2010	bay laurel
1	32268.01506	4157217.399	2009	2013	bay laurel
2	32229.85807	4157163.414	2009	2013	bay laurel
1	35581.42449	4157440.558	2009	2015	bay laurel
1	37942.98853	4147387.338	2009	2014	bay laurel
1	36789.76682	4147940.946	2009	2012	bay laurel
1	36572.67341	4150578.021	2009	2014	bay laurel
1	37784.87108	4149250.636	2009	2014	bay laurel
3	36200.80366	4150518.476	2009	2010	bay laurel
1	43469.16071	4198470.328	2009	2012	bay laurel
1	47241.12134	4200774.941	2009	2014	bay laurel
1	41947.98207	4199324.254	2009	2015	bay laurel
3	6275.571393	4267609.622	2008	2012	bay laurel
1	3643.681804	4272440.699	2010	2012	bay laurel
1	3907.526109	4272503.284	2010	2012	bay laurel
1	3767.012541	4272487.433	2010	2012	bay laurel
1	43741.01559	4208836.153	2010	2012	bay laurel
3	15093.97436	4218491.911	2010	2013	bay laurel
2	38819.78168	4204629.032	2010	2012	bay laurel
1	38990.79449	4204507.521	2010	2014	bay laurel
1	39090.73143	4204727.129	2010	2014	bay laurel
1	46826.72017	4146184.582	2010	2012	bay laurel
1	42428.66866	4147076.685	2010	2014	bay laurel
1	44585.01715	4146312.779	2010	2012	bay laurel
3	43288.18848	4146709.11	2010	2015	bay laurel
1	43920.1926	4149559.421	2010	2013	bay laurel
1	43874.26146	4149656.099	2010	2012	bay laurel
1	42234.31981	4148597.733	2010	2015	bay laurel
1	42719.34964	4146840.922	2010	2015	bay laurel
1	46046.0646	4149684.826	2010	2013	bay laurel
1	46080.12646	4149660.151	2010	2013	bay laurel
1	36208.44125	4150463.446	2010	2012	bay laurel
1	35995.98771	4150457.656	2010	2012	bay laurel
1	32700.05503	4155095.045	2010	2015	bay laurel
1	34952.65084	4156572.897	2010	2012	bay laurel
1	34504.24527	4153886.219	2010	2013	bay laurel
3	40828.90827	4147499.462	2010	2013	bay laurel
1	41761.04441	4147681.293	2010	2015	bay laurel
4	-3621.666827	4224659.073	2005	2013	bay laurel
4	14752.48187	4259340.757	2005	2012	bay laurel
4	14708.4214	4259694.586	2005	2012	bay laurel
4	14794.95221	4259419.021	2005	2012	bay laurel
2	37822.95088	4204656.548	2008	2011	bay laurel
1	30660.60875	4164581.215	2008	2014	bay laurel
1	35736.77782	4196827.321	2008	2009	bay laurel
1	41623.70526	4203129.364	2010	2012	bay laurel
1	41640.05815	4203093.585	2010	2012	bay laurel
1	-86778.62627	4482945.542	2008	2012	bay laurel
2	-87279.4767	4484918.139	2008	2009	bay laurel
1	-87521.61458	4485249.661	2008	2012	bay laurel
1	-88747.14085	4486770.894	2008	2011	bay laurel
1	-88683.84904	4487205.179	2008	2014	bay laurel
1	-88207.14024	4602530.167	2008	2010	bay laurel
1	-88108.04757	4602529.319	2008	2009	bay laurel
1	-87277.82601	4603175.184	2008	2009	bay laurel
1	-86975.66739	4603049.99	2008	2009	bay laurel
1	-86986.09654	4603175.031	2008	2009	bay laurel
1	-86880.98572	4603130.477	2008	2009	bay laurel
1	-86732.64346	4603150.355	2008	2009	bay laurel
1	-87284.68681	4603100.677	2008	2009	bay laurel
1	-86728.66765	4603721.316	2008	2009	bay laurel
1	-86682.78228	4603983.02	2008	2009	bay laurel
1	-86986.11234	4603087.964	2008	2009	bay laurel
2	-81317.93547	4478869.637	2008	2012	bay laurel
1	-87900.6534	4585982.227	2008	2009	bay laurel
2	-81627.60489	4479060.989	2008	2011	bay laurel
1	-80943.45048	4478811.168	2008	2011	bay laurel
2	-83216.87736	4476101.207	2008	2011	bay laurel
1	-83279.15614	4476188.84	2008	2011	bay laurel
2	-83175.75441	4476182.492	2008	2014	bay laurel
1	-85438.10929	4504702.565	2008	2011	bay laurel
1	-99636.38107	4455027.963	2008	2014	bay laurel
1	-89552.56114	4488777.909	2008	2010	bay laurel
1	-85029.49503	4480694.816	2008	2009	bay laurel
1	-92766.73882	4500560.405	2009	2010	bay laurel
1	-88083.07136	4492817.097	2009	2010	bay laurel
1	-89206.90661	4488990.896	2009	2010	bay laurel
2	-87192.31085	4484771.802	2009	2011	bay laurel
3	-83190.8694	4476036.574	2009	2010	bay laurel
1	-90898.25169	4467364.996	2010	2011	bay laurel
1	-78174.69118	4566801.793	2010	2011	bay laurel
3	-81357.15358	4478916.29	2010	2011	bay laurel
1	-78137.59136	4563834.758	2010	2014	bay laurel
1	-77980.60031	4563637.888	2010	2014	bay laurel
1	-78527.5699	4563878.798	2010	2013	bay laurel
1	-78346.0962	4564101.94	2010	2014	bay laurel
1	-78651.83382	4563867.084	2010	2013	bay laurel
1	-78027.90353	4564963.957	2010	2013	bay laurel
1	-78601.53426	4564789.706	2010	2013	bay laurel
1	-79203.95467	4564854.464	2010	2012	bay laurel
3	-82163.82011	4479289.072	2010	2012	bay laurel
1	-81427.0467	4479072.51	2010	2011	bay laurel
4	-83240.4408	4475943.999	2010	2011	bay laurel
2	-83301.76742	4476093.087	2010	2011	bay laurel
2	-78172.37055	4566714.327	2010	2012	bay laurel
1	-77993.2811	4566772.655	2010	2012	bay laurel
2	-78278.15738	4566678.444	2010	2012	bay laurel
2	-78214.11215	4566478.936	2010	2011	bay laurel
4	-78212.33232	4566053.087	2010	2011	bay laurel
1	-77746.40803	4567079.167	2010	2012	bay laurel
1	-77928.08268	4566816.819	2010	2012	bay laurel
1	-85280.95446	4504630.926	2010	2012	bay laurel
1	-93975.6024	4490227.559	2010	2012	bay laurel
1	-75954.43655	4557961.529	2010	2012	bay laurel
1	-77451.2038	4562894.644	2010	2014	bay laurel
1	-88961.49475	4595782.023	2010	2011	bay laurel
1	-78134.58834	4566814.123	2010	2011	bay laurel
1	-78062.77577	4566833.821	2010	2011	bay laurel
2	-77981.97354	4566830.749	2010	2012	bay laurel
2	-77953.26704	4566884.453	2010	2011	bay laurel
1	-77759.1732	4566958.146	2010	2012	bay laurel
1	-77851.70281	4567334.701	2010	2011	bay laurel
1	-77861.90549	4567373.989	2010	2011	bay laurel
1	-77816.57954	4567501.943	2010	2012	bay laurel
1	-78842.75626	4565967.309	2010	2011	bay laurel
1	-91276.36877	4658124.138	2010	2012	bay laurel
1	-88930.2106	4651535.75	2010	2014	bay laurel
1	-78072.47889	4565746.523	2010	2011	bay laurel
1	-78181.23985	4565925.298	2010	2011	bay laurel
1	-78129.13346	4566315.224	2010	2011	bay laurel
1	-77378.776	4565888.818	2010	2012	bay laurel
3	-78130.018	4566064.51	2010	2011	bay laurel
1	-78533.62421	4565689.056	2010	2011	bay laurel
1	-78680.31306	4565791.028	2010	2012	bay laurel
1	-78238.33719	4565625.637	2010	2011	bay laurel
1	-78195.19567	4565638.256	2010	2011	bay laurel
1	-78193.82884	4565818.312	2010	2011	bay laurel
1	-81265.40143	4478915.087	2011	2012	bay laurel
1	-81191.39763	4478852.684	2011	2012	bay laurel
1	-81033.60347	4478773.016	2011	2012	bay laurel
4	-81379.89289	4479246.436	2011	2012	bay laurel
3	-78229.1521	4566698.204	2011	2012	bay laurel
4	-77936.74408	4566669.619	2011	2012	bay laurel
1	-77608.68825	4563711.175	2011	2012	bay laurel
4	-77891.75908	4566725.889	2011	2012	bay laurel
4	-77863.61303	4566778.793	2011	2012	bay laurel
4	-78016.69407	4566607.371	2011	2012	bay laurel
1	-77751.27996	4567195.58	2011	2012	bay laurel
1	-77631.40884	4566107.058	2011	2012	bay laurel
1	-77756.62933	4566040.223	2011	2012	bay laurel
1	-77822.17747	4565793.141	2011	2012	bay laurel
1	-77828.23028	4565552.519	2011	2012	bay laurel
1	-77390.9576	4566588.963	2011	2012	bay laurel
1	-77204.20137	4566640.809	2011	2012	bay laurel
1	-76844.98633	4566429.634	2011	2012	bay laurel
1	-77292.12143	4566370.957	2011	2012	bay laurel
4	-81836.16848	4478953.896	2011	2012	bay laurel
4	-81791.77874	4478955.522	2011	2012	bay laurel
4	-81671.80357	4479099.215	2011	2012	bay laurel
4	-81395.85326	4479324.005	2011	2012	bay laurel
1	-81173.43175	4479301.838	2011	2012	bay laurel
2	-81144.09198	4479249.856	2011	2012	bay laurel
3	-81301.86312	4479233.58	2011	2012	bay laurel
1	-77283.03872	4566177.591	2011	2012	bay laurel
1	-77485.22902	4566008.64	2011	2012	bay laurel
1	-77455.36521	4566032.996	2011	2012	bay laurel
1	-75768.12713	4555913.219	2011	2014	bay laurel
1	-75889.39684	4555679.706	2011	2012	bay laurel
2	-77809.59266	4566040.862	2011	2012	bay laurel
1	-77433.19906	4565991.106	2011	2012	bay laurel
1	-77383.75913	4565995.091	2011	2012	bay laurel
1	-77746.03839	4565751.649	2011	2012	bay laurel
4	-82226.03937	4460050.552	2011	2013	bay laurel
1	-82168.90115	4460106.562	2011	2012	bay laurel
1	-78696.58379	4565956.208	2011	2012	bay laurel
1	-77854.88245	4568080.021	2011	2012	bay laurel
1	-77869.46556	4568043.79	2011	2012	bay laurel
1	-77858.38577	4567614.282	2011	2012	bay laurel
1	-77817.67493	4567797.996	2011	2012	bay laurel
1	-77791.98868	4568028.877	2011	2012	bay laurel
1	-77867.39185	4565510.101	2011	2012	bay laurel
1	-77306.37945	4566006.771	2011	2012	bay laurel
1	-77396.81879	4565943.707	2011	2012	bay laurel
1	-77287.80144	4565974.626	2011	2012	bay laurel
2	-77772.73675	4567389.969	2011	2012	bay laurel
2	-81474.04166	4478840.203	2011	2012	bay laurel
1	-77756.57836	4567623.849	2011	2012	bay laurel
1	-77797.88631	4567987.265	2011	2012	bay laurel
1	-9100.155312	4266994.021	2011	2012	bay laurel
1	-24336.86523	4278280.503	2011	2012	bay laurel
1	37909.99846	4155340.951	2012	2013	bay laurel
1	41327.13029	4158536.238	2012	2013	bay laurel
4	23741.66927	4172828.504	2012	2015	bay laurel
4	23956.70383	4172966.571	2012	2015	bay laurel
1	23247.45335	4172362.287	2012	2013	bay laurel
1	68362.12656	4044674.432	2012	2015	bay laurel
1	67885.46492	4044453.402	2012	2014	bay laurel
1	67809.91258	4044401.529	2012	2015	bay laurel
4	67726.0826	4044427.993	2012	2015	bay laurel
1	67543.71016	4044292.421	2012	2014	bay laurel
4	67312.52085	4044181.565	2012	2015	bay laurel
4	67188.53796	4044109.862	2012	2015	bay laurel
1	70972.59036	4041633.377	2012	2013	bay laurel
1	70811.41852	4041810.211	2012	2014	bay laurel
1	70491.16257	4042219.443	2012	2014	bay laurel
1	70369.46474	4042258.894	2012	2014	bay laurel
3	66047.54646	4047161.398	2012	2014	bay laurel
3	66224.52633	4047067.475	2012	2014	bay laurel
1	66390.84072	4046910.677	2012	2015	bay laurel
4	66556.43433	4046646.31	2012	2014	bay laurel
1	66749.77292	4046603.193	2012	2015	bay laurel
4	67150.61859	4046460.602	2012	2015	bay laurel
3	67583.20415	4046483.417	2012	2015	bay laurel
1	69183.32525	4047483.057	2012	2013	bay laurel
1	69093.35753	4047587.74	2012	2014	bay laurel
1	68904.12927	4049367.145	2012	2015	bay laurel
3	68960.17999	4049720.554	2012	2015	bay laurel
1	68988.34458	4049841.593	2012	2015	bay laurel
1	69254.64977	4051008.224	2012	2013	bay laurel
4	64262.02501	4048955.108	2012	2015	bay laurel
4	64177.38557	4048970.523	2012	2014	bay laurel
4	64115.76335	4048906.846	2012	2015	bay laurel
3	64030.5195	4048877.763	2012	2015	bay laurel
3	63936.09945	4048893.675	2012	2014	bay laurel
3	63846.25368	4048898.225	2012	2014	bay laurel
2	63646.48473	4048841.547	2012	2015	bay laurel
4	66177.59764	4046747.005	2012	2013	bay laurel
3	66201.92995	4046392.465	2012	2015	bay laurel
3	76636.7783	4046573.81	2012	2013	bay laurel
3	64333.61808	4048984.884	2012	2015	bay laurel
3	64447.11154	4048934.613	2012	2015	bay laurel
4	64574.1344	4048839.13	2012	2013	bay laurel
3	64706.79335	4048754.498	2012	2014	bay laurel
4	65390.22611	4047874.652	2012	2015	bay laurel
4	65598.81846	4047529.44	2012	2014	bay laurel
4	65719.39465	4047388.198	2012	2015	bay laurel
4	65830.72857	4047260.124	2012	2015	bay laurel
1	73161.71815	4041652.867	2012	2015	bay laurel
1	73073.51647	4041779.667	2012	2015	bay laurel
3	72984.90674	4041917.619	2012	2015	bay laurel
1	72881.19829	4041933.881	2012	2015	bay laurel
1	72746.98399	4042007.308	2012	2015	bay laurel
1	72692.99831	4042043.373	2012	2015	bay laurel
1	73039.19915	4042326.773	2012	2015	bay laurel
1	72310.35288	4042796.965	2012	2015	bay laurel
3	65110.71586	4048455.784	2012	2014	bay laurel
3	65159.11691	4048351.479	2012	2014	bay laurel
3	65334.55813	4047923.548	2012	2014	bay laurel
2	65256.62321	4048114.448	2012	2015	bay laurel
4	64880.32085	4048650.837	2012	2015	bay laurel
3	70109.01837	4045633.532	2012	2015	bay laurel
1	71566.02802	4045060.941	2012	2014	bay laurel
3	71072.81304	4046197.747	2012	2015	bay laurel
1	70712.08844	4045592.352	2012	2015	bay laurel
1	71356.90229	4043136.463	2012	2015	bay laurel
4	70161.05583	4045652.829	2012	2015	bay laurel
3	71178.62485	4046136.827	2012	2014	bay laurel
1	70331.60323	4045619.487	2012	2014	bay laurel
1	71239.95807	4046156.038	2012	2015	bay laurel
4	43994.19974	4200123.248	2012	2014	bay laurel
4	43646.254	4200606.333	2012	2014	bay laurel
1	45904.58174	4209772.936	2012	2014	bay laurel
1	45151.6098	4203848.852	2012	2013	bay laurel
2	43562.67278	4197092.442	2012	2013	bay laurel
1	49452.83199	4212893.842	2012	2014	bay laurel
1	67501.51907	4171811.424	2012	2015	bay laurel
1	72416.74858	4159996.177	2012	2013	bay laurel
1	72288.77302	4159854.128	2012	2013	bay laurel
1	72588.10997	4159283.136	2012	2013	bay laurel
1	72268.30453	4156810.046	2012	2013	bay laurel
1	38883.07854	4204358.346	2012	2013	bay laurel
3	38981.13455	4204641.995	2012	2015	bay laurel
4	39112.80286	4204641.541	2012	2015	bay laurel
3	39142.82537	4204568.246	2012	2015	bay laurel
3	38911.34574	4204510.418	2012	2014	bay laurel
3	38675.73067	4204502.308	2012	2015	bay laurel
1	37098.80089	4204821.288	2012	2015	bay laurel
1	37663.56275	4204681.368	2012	2014	bay laurel
1	36916.00321	4204573.084	2012	2014	bay laurel
1	36980.34859	4204503.985	2012	2014	bay laurel
3	40845.39567	4197644.709	2012	2015	bay laurel
3	41148.97653	4198245.313	2012	2014	bay laurel
1	40778.37135	4197591.027	2012	2015	bay laurel
1	37592.10322	4207542.205	2012	2015	bay laurel
3	37506.02612	4207596.988	2012	2015	bay laurel
4	38034.2496	4206811.718	2012	2013	bay laurel
4	43759.30067	4197873.41	2012	2013	bay laurel
3	43685.3804	4197952.472	2012	2015	bay laurel
1	36619.2901	4206079.129	2012	2013	bay laurel
1	36990.28116	4206200.841	2012	2013	bay laurel
3	41651.37417	4198361.32	2012	2013	bay laurel
1	41738.77501	4198317.447	2012	2014	bay laurel
1	41735.98429	4198333.387	2012	2013	bay laurel
1	37361.6598	4206994.121	2012	2013	bay laurel
1	35261.11758	4207819.933	2012	2014	bay laurel
3	35864.18025	4208115.953	2012	2015	bay laurel
1	38978.68754	4204924.901	2012	2014	bay laurel
1	39040.42539	4204872.178	2012	2015	bay laurel
2	35429.93972	4207848.785	2012	2013	bay laurel
1	35399.73467	4207886.713	2012	2013	bay laurel
3	36108.15405	4207689.957	2012	2013	bay laurel
3	41470.74022	4198423.815	2012	2014	bay laurel
1	41820.97536	4198248.461	2012	2014	bay laurel
1	39284.70755	4203385.921	2012	2013	bay laurel
3	39225.37755	4203475.716	2012	2015	bay laurel
1	39182.65339	4203506.271	2012	2013	bay laurel
1	36265.40954	4207236.797	2012	2014	bay laurel
3	56715.51493	4185391.609	2012	2013	bay laurel
1	47765.01491	4145315.269	2012	2013	bay laurel
1	43325.14664	4148751.216	2012	2015	bay laurel
1	46943.75834	4144853.187	2012	2013	bay laurel
4	43499.50057	4145472.912	2012	2014	bay laurel
1	43684.4378	4146701.52	2012	2013	bay laurel
1	43892.01002	4146550.82	2012	2013	bay laurel
1	43527.48212	4146611.135	2012	2013	bay laurel
3	43309.24693	4145636.65	2012	2014	bay laurel
4	43700.57313	4145227.941	2012	2014	bay laurel
1	43215.77754	4146675.536	2012	2013	bay laurel
4	14441.91842	4217827.352	2012	2015	bay laurel
1	32645.59466	4253477.788	2012	2013	bay laurel
1	19245.22479	4196909.36	2012	2014	bay laurel
1	18938.28293	4197045.371	2012	2014	bay laurel
1	18159.33528	4197591.168	2012	2015	bay laurel
1	18172.14496	4196446.518	2012	2014	bay laurel
1	18412.16807	4198182.879	2012	2014	bay laurel
1	18888.77175	4194325.755	2012	2014	bay laurel
1	18709.23263	4194133.236	2012	2014	bay laurel
1	18532.90575	4194314.798	2012	2014	bay laurel
1	19057.25818	4194740.18	2012	2015	bay laurel
1	18654.69	4194281.805	2012	2015	bay laurel
1	18044.06132	4194013.285	2012	2014	bay laurel
1	19391.79639	4194674.294	2012	2015	bay laurel
1	18124.9644	4194007.315	2012	2014	bay laurel
4	47140.89578	4105595.072	2012	2013	bay laurel
2	43914.57107	4149455.679	2012	2013	bay laurel
1	46769.15006	4146220.777	2012	2015	bay laurel
1	46652.32064	4146182.514	2012	2015	bay laurel
1	46560.70655	4146107.573	2012	2015	bay laurel
1	43910.43016	4146638.09	2012	2013	bay laurel
4	44739.36256	4136226.55	2012	2013	bay laurel
3	34271.03199	4149269.131	2012	2015	bay laurel
3	33750.00408	4150530.371	2012	2014	bay laurel
4	50856.57913	4130438.471	2012	2014	bay laurel
2	50344.0554	4129687.248	2012	2014	bay laurel
4	49959.1674	4129630.234	2012	2014	bay laurel
4	49906.55996	4129621.982	2012	2014	bay laurel
4	49978.77265	4129600.844	2012	2014	bay laurel
3	37938.09828	4140041.747	2012	2015	bay laurel
4	2365.120023	4300840.866	2012	2013	bay laurel
4	2179.762931	4300957.317	2012	2013	bay laurel
4	2587.305504	4301019.32	2012	2013	bay laurel
1	734.726746	4299757.136	2012	2013	bay laurel
1	76.392547	4300023.272	2012	2013	bay laurel
3	1047.166648	4299875.794	2012	2013	bay laurel
1	3816.076878	4272203.322	2012	2013	bay laurel
1	3702.61274	4271447.781	2012	2013	bay laurel
3	-12110.18507	4282319.189	2012	2014	bay laurel
1	-12034.8654	4282115.223	2012	2013	bay laurel
1	3596.030414	4268520.391	2012	2013	bay laurel
3	-13876.74606	4282800.983	2012	2014	bay laurel
4	15332.88929	4249832.554	2012	2013	bay laurel
1	14669.68945	4249583.117	2012	2013	bay laurel
1	-79082.04491	4565919.934	2012	2013	bay laurel
1	24613.17888	4253328.159	2012	2014	bay laurel
2	24680.10084	4253303.481	2012	2014	bay laurel
1	-79567.23372	4564891.633	2012	2013	bay laurel
1	17426.90477	4252022.74	2012	2013	bay laurel
1	17430.16524	4251997.203	2012	2013	bay laurel
1	-76633.11172	4564918.437	2012	2014	bay laurel
1	-76926.50913	4564750.502	2012	2014	bay laurel
1	39056.58166	4147839.872	2012	2014	bay laurel
1	32544.02893	4154967.566	2012	2015	bay laurel
1	-76170.87204	4568758.38	2012	2014	bay laurel
1	-75102.1967	4567644.73	2012	2013	bay laurel
1	-75092.25156	4567657.626	2012	2013	bay laurel
2	36562.53174	4153302.921	2012	2013	bay laurel
1	36388.17217	4153360.868	2012	2014	bay laurel
1	-74901.97056	4567301.798	2012	2013	bay laurel
3	36250.29829	4153094.105	2012	2015	bay laurel
4	36500.9306	4156707.342	2012	2014	bay laurel
1	-76000.96782	4569493.4	2012	2013	bay laurel
1	-77517.15017	4569522.563	2012	2014	bay laurel
1	-77523.21714	4569514.925	2012	2014	bay laurel
1	-75941.09257	4569362.279	2012	2013	bay laurel
1	-75905.79478	4569312.375	2012	2013	bay laurel
1	33844.19019	4159441.757	2012	2014	bay laurel
1	33650.82482	4159664.899	2012	2014	bay laurel
1	33730.59027	4159429.089	2012	2013	bay laurel
1	33448.91487	4159772.644	2012	2013	bay laurel
1	-76112.18696	4568884.155	2012	2013	bay laurel
1	-76137.7771	4568533.332	2012	2014	bay laurel
1	-76163.01446	4568702.148	2012	2013	bay laurel
1	-78000.30552	4568385.964	2012	2014	bay laurel
1	34508.36068	4159512.059	2012	2013	bay laurel
1	-75742.68522	4566371.593	2012	2013	bay laurel
1	-75739.18054	4566232.963	2012	2014	bay laurel
1	-75840.42861	4566275.19	2012	2013	bay laurel
1	-75873.78044	4566251.321	2012	2013	bay laurel
1	-75691.86504	4566218.627	2012	2013	bay laurel
1	34235.79856	4159563.124	2012	2013	bay laurel
1	-76803.44655	4569240.734	2012	2013	bay laurel
1	32766.82104	4159821.545	2012	2014	bay laurel
1	36083.21644	4152916.213	2012	2014	bay laurel
1	34040.1571	4158057.728	2012	2013	bay laurel
3	33954.95376	4158056.853	2012	2013	bay laurel
1	34355.1166	4159611.698	2012	2014	bay laurel
2	-75989.24351	4568105.073	2012	2013	bay laurel
1	34381.00475	4159625.113	2012	2014	bay laurel
1	-76138.41289	4567912.587	2012	2013	bay laurel
2	-76226.31097	4567674.606	2012	2013	bay laurel
1	34153.78864	4159509.714	2012	2013	bay laurel
1	34149.68682	4159452.524	2012	2014	bay laurel
1	-77739.82808	4564964.387	2012	2013	bay laurel
1	-77745.83949	4564903.61	2012	2013	bay laurel
1	-77931.13781	4564944.185	2012	2013	bay laurel
1	-77863.66826	4564922.919	2012	2013	bay laurel
1	-77975.30121	4564924.092	2012	2013	bay laurel
1	-78041.53515	4564905.014	2012	2013	bay laurel
1	-78168.2136	4564792.821	2012	2013	bay laurel
1	-78236.18527	4564767.996	2012	2013	bay laurel
1	-76727.28383	4567270.086	2012	2013	bay laurel
1	-76765.07296	4567266.993	2012	2013	bay laurel
2	-76293.7127	4566538.987	2012	2013	bay laurel
2	-76169.88558	4566415.694	2012	2013	bay laurel
4	-77220.2962	4566846.058	2012	2013	bay laurel
1	-88482.96658	4489895.759	2012	2014	bay laurel
4	-80445.5768	4477410.28	2012	2014	bay laurel
1	-98126.87703	4453717.836	2012	2013	bay laurel
1	-97858.43763	4453415.47	2012	2014	bay laurel
1	-85316.01615	4504704.616	2012	2013	bay laurel
1	-77271.52407	4382873.609	2012	2013	bay laurel
1	-75872.22536	4381507.9	2012	2013	bay laurel
4	49962.86405	4105294.009	2013	2014	bay laurel
2	13087.82619	4225699.149	2013	2015	bay laurel
1	10617.99146	4228938.184	2013	2015	bay laurel
1	15601.45279	4219072.382	2013	2014	bay laurel
3	44154.75995	4195470.212	2013	2015	bay laurel
3	44287.56735	4195561.433	2013	2015	bay laurel
1	38934.43621	4204287.49	2013	2014	bay laurel
2	38968.01446	4203363.156	2013	2015	bay laurel
1	39163.24826	4200046.951	2013	2014	bay laurel
4	37398.38223	4205966.63	2013	2014	bay laurel
1	36031.21235	4207286.065	2013	2015	bay laurel
1	36566.78834	4206083.383	2013	2014	bay laurel
1	34711.48463	4210671.105	2013	2015	bay laurel
1	34716.32133	4210590.175	2013	2015	bay laurel
1	47315.28192	4195061.005	2013	2014	bay laurel
1	35356.73733	4210284.796	2013	2015	bay laurel
1	35557.97061	4207912.497	2013	2014	bay laurel
1	35586.2258	4207917.163	2013	2015	bay laurel
1	43496.03245	4197491.153	2013	2015	bay laurel
1	43436.04974	4197638.129	2013	2015	bay laurel
2	37521.75925	4207344.288	2013	2015	bay laurel
2	38135.17649	4207074.54	2013	2015	bay laurel
1	37968.89992	4206836.578	2013	2015	bay laurel
2	46518.00574	4202277.353	2013	2014	bay laurel
1	46714.03179	4200950.647	2013	2014	bay laurel
1	47167.75808	4200818.849	2013	2014	bay laurel
1	51488.27704	4203730.131	2013	2015	bay laurel
1	51465.65252	4203665.017	2013	2015	bay laurel
3	38560.25643	4204410.569	2013	2015	bay laurel
2	38607.81711	4204458.361	2013	2014	bay laurel
1	170708.5954	3914583.12	2013	2015	bay laurel
1	168642.0131	3911795.585	2013	2015	bay laurel
1	167531.8492	3913296.294	2013	2015	bay laurel
1	168745.6558	3915133.642	2013	2015	bay laurel
1	150200.2485	3938465.767	2013	2015	bay laurel
1	169040.2149	3906907.542	2013	2015	bay laurel
1	142074.515	3942582.724	2013	2014	bay laurel
1	184206.0326	3904701.423	2013	2014	bay laurel
1	184139.7164	3904648.983	2013	2014	bay laurel
1	184130.1405	3904664.751	2013	2014	bay laurel
1	185375.352	3902925.731	2013	2015	bay laurel
1	170204.8902	3911044.957	2013	2014	bay laurel
1	170269.9746	3911001.825	2013	2015	bay laurel
1	170301.1725	3910935.864	2013	2015	bay laurel
1	162074.0378	3908579.029	2013	2015	bay laurel
1	161869.3897	3908636.713	2013	2015	bay laurel
1	155171.158	3939721.078	2013	2015	bay laurel
1	71654.27042	4042439.919	2013	2015	bay laurel
1	71710.40272	4042570.706	2013	2015	bay laurel
1	71731.55201	4042680.967	2013	2015	bay laurel
1	71756.0471	4042735.406	2013	2015	bay laurel
1	71807.5916	4042810.766	2013	2015	bay laurel
1	71792.88084	4043011.854	2013	2015	bay laurel
1	71151.41149	4042817.749	2013	2014	bay laurel
1	71408.54767	4043153.377	2013	2015	bay laurel
4	69519.69193	4042056.343	2013	2014	bay laurel
1	71040.31214	4042281.183	2013	2015	bay laurel
1	69583.65996	4042132.606	2013	2015	bay laurel
1	69609.45902	4042319.02	2013	2014	bay laurel
1	69640.87528	4042384.242	2013	2014	bay laurel
1	69791.96699	4042457.234	2013	2015	bay laurel
1	66180.99078	4046477.725	2013	2015	bay laurel
3	66275.65471	4046204.017	2013	2014	bay laurel
3	66261.26192	4045846.422	2013	2015	bay laurel
4	66196.11357	4046806.574	2013	2015	bay laurel
3	66171.88921	4046566.217	2013	2015	bay laurel
1	64844.96599	4051753.286	2013	2015	bay laurel
1	72119.60481	4042962.254	2013	2015	bay laurel
1	72904.82195	4042444.729	2013	2015	bay laurel
1	72789.86671	4050651.14	2013	2015	bay laurel
1	-84443.19458	4372475.274	2013	2014	bay laurel
1	70559.54738	4166376.31	2013	2015	bay laurel
1	53347.83154	4135380.374	2013	2015	bay laurel
2	53584.14528	4133919.741	2013	2015	bay laurel
1	56170.14536	4133420.758	2013	2015	bay laurel
3	53694.76236	4133694.397	2013	2014	bay laurel
4	49025.8633	4130750.178	2013	2015	bay laurel
3	49048.4401	4131142.5	2013	2014	bay laurel
3	48847.18888	4131071.642	2013	2014	bay laurel
4	33767.72637	4150501.894	2013	2015	bay laurel
4	46767.97362	4134131.656	2013	2015	bay laurel
4	51958.87692	4129546.089	2013	2015	bay laurel
4	52363.90076	4128864.237	2013	2015	bay laurel
3	53563.0324	4127940.414	2013	2015	bay laurel
3	40293.36423	4139937.252	2013	2014	bay laurel
4	43053.92844	4133983.665	2013	2015	bay laurel
4	42792.85702	4134095.374	2013	2015	bay laurel
1	42890.67704	4134256.006	2013	2015	bay laurel
4	52850.07369	4129526.424	2013	2015	bay laurel
3	52133.57126	4130749.268	2013	2015	bay laurel
3	52809.42128	4129538.651	2013	2015	bay laurel
1	52578.57433	4129775.98	2013	2015	bay laurel
3	52155.80884	4130354.22	2013	2015	bay laurel
4	52228.06658	4130627.339	2013	2015	bay laurel
3	43751.61472	4137379.669	2013	2014	bay laurel
4	50728.63232	4129008.432	2013	2014	bay laurel
2	49292.47543	4129647.34	2013	2014	bay laurel
1	50103.95632	4129230.124	2013	2014	bay laurel
4	47547.00122	4130997.65	2013	2015	bay laurel
4	47830.5501	4131291.988	2013	2015	bay laurel
4	47889.45117	4131657.475	2013	2015	bay laurel
4	36229.92838	4153101.189	2013	2015	bay laurel
1	36322.31293	4153183.053	2013	2014	bay laurel
1	36014.48641	4157875.464	2013	2014	bay laurel
1	34216.91992	4159459.228	2013	2014	bay laurel
1	36004.25954	4157703.629	2013	2015	bay laurel
1	36357.3704	4152913.575	2013	2014	bay laurel
1	36465.20172	4153175.654	2013	2014	bay laurel
1	23847.50769	4171953.529	2013	2015	bay laurel
3	23852.21941	4171984.935	2013	2015	bay laurel
3	23969.82223	4171752.257	2013	2015	bay laurel
3	24096.10629	4173131.28	2013	2015	bay laurel
2	23635.59274	4172834.611	2013	2015	bay laurel
1	24378.66008	4172646.103	2013	2015	bay laurel
1	40537.31354	4147729.625	2013	2015	bay laurel
3	44595.78344	4146414.076	2013	2014	bay laurel
1	47889.33631	4149113.396	2013	2014	bay laurel
4	42562.92611	4146214.435	2013	2014	bay laurel
1	46537.12275	4148773.642	2013	2014	bay laurel
1	39323.58402	4251601.156	2013	2014	bay laurel
1	39867.90799	4255491.133	2013	2014	bay laurel
1	1874.353037	4277100.674	2013	2015	bay laurel
1	3435.863506	4274523.46	2013	2015	bay laurel
1	3420.757764	4274515.921	2013	2015	bay laurel
1	3081.657437	4275435.865	2013	2014	bay laurel
4	-90.313682	4301954.841	2013	2014	bay laurel
3	389.44366	4299220.655	2013	2014	bay laurel
2	2422.677729	4276610.682	2013	2015	bay laurel
1	3845.053423	4272202.949	2013	2015	bay laurel
3	-654.395169	4301627.371	2013	2014	bay laurel
1	-20572.80975	4305061.042	2013	2015	bay laurel
1	-18695.8199	4308748.99	2013	2014	bay laurel
1	-76138.10552	4568582.003	2013	2014	bay laurel
2	-76181.4767	4568534.513	2013	2014	bay laurel
1	-56330.82951	4474254.002	2013	2014	bay laurel
4	-56509.97922	4474251.422	2013	2014	bay laurel
1	66172.71233	4046499.47	2014	2015	bay laurel
1	65639.49301	4050744.626	2014	2015	bay laurel
4	66033.00697	4050468.735	2014	2015	bay laurel
1	70913.03979	4042198.46	2014	2015	bay laurel
1	71536.19917	4042367.863	2014	2015	bay laurel
1	71725.15377	4042970.691	2014	2015	bay laurel
1	71765.14985	4042857.396	2014	2015	bay laurel
4	64918.96683	4048612.025	2014	2015	bay laurel
1	67341.39294	4045133.002	2014	2015	bay laurel
1	66050.47394	4050935.521	2014	2015	bay laurel
1	66105.93008	4051188.768	2014	2015	bay laurel
1	46763.74743	4134179.779	2014	2015	bay laurel
1	34252.15573	4149307.97	2014	2015	bay laurel
1	49011.00745	4130750.053	2014	2015	bay laurel
2	53581.47474	4127920.802	2014	2015	bay laurel
4	-23267.18265	4267176.59	2014	2015	bay laurel
1	2420.437778	4275566.018	2014	2015	bay laurel
4	2969.749645	4274870.451	2014	2015	bay laurel
3	2912.969036	4274777.554	2014	2015	bay laurel
2	2928.463692	4274740.053	2014	2015	bay laurel
1	3630.903392	4274966.168	2014	2015	bay laurel
3	38052.49286	4147771.503	2014	2015	bay laurel
1	22616.41797	4171376.479	2014	2015	bay laurel
3	22565.74191	4171422.975	2014	2015	bay laurel
1	36270.35751	4207101.844	2014	2015	bay laurel
1	37702.71882	4207687.261	2014	2015	bay laurel
3	38027.4679	4207199.84	2014	2015	bay laurel
3	38042.60667	4206842.444	2014	2015	bay laurel
3	38093.98215	4206767.121	2014	2015	bay laurel
1	35652.1483	4207951.789	2014	2015	bay laurel
1	35613.30418	4207946.677	2014	2015	bay laurel
1	71835.95133	4019414.645	2014	2015	bay laurel
1	71858.19538	4018947.834	2014	2015	bay laurel
1	71653.99825	4019658.99	2014	2015	bay laurel
1	71612.45471	4019564.919	2014	2015	bay laurel
1	71451.79284	4019550.465	2014	2015	bay laurel
2	71470.5771	4019399.651	2014	2015	bay laurel
1	71900.51173	4019323.558	2014	2015	bay laurel
2	71734.32488	4019172.111	2014	2015	bay laurel
2	71833.66291	4019150.916	2014	2015	bay laurel
2	71803.74924	4019149.289	2014	2015	bay laurel
1	70198.08003	4022565.119	2014	2015	bay laurel
1	70218.08344	4022562.394	2014	2015	bay laurel
2	70328.62071	4022484.681	2014	2015	bay laurel
1	39484.10617	4199167.137	2014	2015	bay laurel
1	38734.92045	4199438.75	2014	2015	bay laurel
1	39754.84688	4199802.596	2014	2015	bay laurel
1	37399.63427	4153193.869	2014	2015	bay laurel
1	37412.91565	4153218.587	2014	2015	bay laurel
1	37560.93287	4153129.986	2014	2015	bay laurel
1	37470.91871	4153177.32	2014	2015	bay laurel
1	157146.3907	3922444.426	2014	2015	bay laurel
1	131120.0656	3948560.076	2014	2015	bay laurel
1	160574.4803	3908939.129	2014	2015	bay laurel
1	170514.8669	3915326.726	2014	2015	bay laurel
1	185416.7573	3902800.531	2014	2015	bay laurel
1	139018.0559	3943862.513	2014	2015	bay laurel
1	2358.478045	4275432.876	2014	2015	bay laurel
1	42601.40418	4146892.511	2014	2015	bay laurel
1	42561.49213	4146888.164	2014	2015	bay laurel
3	38943.59922	4204726.289	2014	2015	bay laurel
2	39064.01841	4204688.591	2014	2015	bay laurel
