# Supplementary material
Source: MDPI journal article supplement (https://www.mdpi.com/1999-4907/8/8/293)
Supplement: s1 [file s1 › DATASET S5.csv]

switch	xmed	ymed	fy	ly	species
1	39052.23542	4203484.434	2010	2012	tanoak
1	14935.69439	4218390.817	2011	2015	tanoak
1	-13383.34392	4264656.875	2011	2013	tanoak
3	38332.68098	4143525.73	2011	2012	tanoak
1	30589.19138	4151732.494	2009	2012	tanoak
3	49089.26735	4131670.286	2011	2012	tanoak
3	41234.60017	4144154.949	2011	2015	tanoak
1	38735.9708	4149739.041	2011	2015	tanoak
4	62865.05052	4046304.156	2009	2014	tanoak
3	69511.93566	4031393.409	2009	2013	tanoak
4	78312.79891	4014054.52	2009	2013	tanoak
4	99890.37377	3987816.384	2010	2013	tanoak
4	65637.74831	4047085.276	2010	2015	tanoak
4	98805.51161	3986457.23	2010	2014	tanoak
1	63447.95655	4049562.625	2010	2014	tanoak
2	74054.13575	4022532.068	2010	2013	tanoak
2	80349.23233	4012596.304	2009	2013	tanoak
1	89648.6099	4000788.24	2010	2013	tanoak
1	-87121.7558	4585453.843	2008	2011	tanoak
1	-91589.8291	4640979.695	2008	2012	tanoak
1	-80014.91504	4452022.744	2008	2012	tanoak
3	8091.802789	4214892.177	2011	2012	tanoak
1	-19860.29792	4289491.939	2010	2011	tanoak
4	-100060.0664	4689040.68	2008	2013	tanoak
4	-100317.6361	4692390.352	2008	2013	tanoak
4	-100442.332	4683171.79	2008	2013	tanoak
4	-102657.0985	4685844.225	2008	2012	tanoak
4	-101931.9704	4683469.491	2008	2013	tanoak
4	-100686.011	4681281.648	2008	2012	tanoak
4	-100576.3304	4685947.295	2008	2013	tanoak
4	-97996.26789	4690786.046	2008	2013	tanoak
4	-105407.405	4686958.161	2008	2011	tanoak
4	-104065.1116	4691539.589	2008	2013	tanoak
4	-103583.907	4688470.387	2009	2013	tanoak
4	-104119.072	4694222.946	2009	2013	tanoak
4	-100372.846	4694126.344	2009	2013	tanoak
4	-105466.2052	4688489.853	2009	2012	tanoak
4	-97476.23356	4690092.135	2009	2013	tanoak
1	-91255.77932	4468682.168	2010	2012	tanoak
1	-78068.51073	4567591.368	2010	2014	tanoak
4	-89235.85814	4487764.15	2010	2012	tanoak
3	-84191.771	4393468.222	2009	2010	tanoak
1	-85709.85194	4375527.776	2010	2013	tanoak
1	-93013.72343	4469498.234	2010	2012	tanoak
1	-75858.58735	4556107.963	2010	2012	tanoak
1	-102396.2891	4462834.308	2010	2014	tanoak
1	-97959.05567	4453520.257	2010	2012	tanoak
1	-85174.38557	4504975.415	2011	2013	tanoak
1	-93196.4831	4459556.865	2011	2012	tanoak
1	-78910.33923	4472962.574	2011	2014	tanoak
1	-78848.98815	4473440.08	2011	2012	tanoak
2	-72171.85045	4490887.255	2011	2013	tanoak
1	-24337.54973	4278270.06	2011	2012	tanoak
1	73918.94813	4041687.813	2012	2015	tanoak
1	37027.46253	4204680.937	2012	2013	tanoak
1	38578.86717	4205627.881	2012	2015	tanoak
1	18095.38734	4194193.407	2012	2013	tanoak
1	-82165.02953	4481147.648	2012	2013	tanoak
1	-97301.09765	4487124.408	2012	2013	tanoak
1	-77310.38077	4570181.739	2012	2014	tanoak
1	-64933.50932	4549459.919	2012	2014	tanoak
1	-97873.694	4488879.807	2012	2013	tanoak
2	-84176.03133	4481349.341	2012	2013	tanoak
3	-80411.27534	4477678	2012	2014	tanoak
1	-59610.93582	4484594.746	2012	2014	tanoak
1	-72315.79993	4383091.261	2012	2013	tanoak
1	-76385.56886	4381617.048	2012	2013	tanoak
1	-60835.62211	4486823.653	2012	2014	tanoak
1	-14889.97241	4234244.746	2013	2015	tanoak
1	32597.94729	4142545.704	2013	2014	tanoak
1	32962.43981	4160480.141	2013	2015	tanoak
1	23701.42098	4172240.63	2013	2015	tanoak
2	-30584.5104	4276367.355	2013	2014	tanoak
1	-78768.04691	4563325.918	2013	2014	tanoak
1	-81036.90591	4525465.742	2013	2014	tanoak
4	-98031.68435	4685570.486	2011	2013	tanoak
4	-106100.2361	4691164.21	2012	2013	tanoak
1	71610.30008	4021798.75	2013	2014	tanoak
4	99199.56103	3992172.053	2013	2014	tanoak
2	21796.75021	4265414.686	2008	2011	oaks
1	8035.973617	4216067.684	2008	2011	oaks
1	6416.992885	4231781.058	2008	2010	oaks
3	18776.14611	4220509.753	2008	2010	oaks
2	18211.51582	4220430.65	2008	2010	oaks
4	39038.07472	4143458.941	2008	2011	oaks
4	41209.92999	4142578	2008	2011	oaks
2	29578.58791	4161666.219	2009	2011	oaks
2	34338.4868	4155772.328	2011	2012	oaks
1	38575.40161	4204582.682	2008	2013	oaks
1	-82216.9248	4460170.202	2008	2010	oaks
3	19099.83133	4195172.64	2010	2013	oaks
1	18201.97702	4193983.385	2012	2015	oaks
1	18179.85483	4195075.407	2013	2015	oaks
1	38958.01974	4158307.317	2010	2015	bay laurel
1	38705.62643	4160487.687	2011	2014	bay laurel
1	41801.08658	4159996.689	2011	2013	bay laurel
3	33034.92015	4158032.677	2008	2015	bay laurel
1	73852.73536	4051241.569	2011	2013	bay laurel
1	76936.31672	4046417.967	2011	2015	bay laurel
1	71113.94859	4045992.256	2008	2015	bay laurel
1	86315.54564	4040755.818	2011	2014	bay laurel
1	69732.68523	4053130.863	2011	2012	bay laurel
1	70388.17408	4054486.758	2011	2015	bay laurel
3	49566.17001	4191102.088	2011	2014	bay laurel
1	44570.60179	4207144.913	2008	2015	bay laurel
1	47865.46325	4206431.278	2009	2013	bay laurel
2	36349.03663	4216381.531	2008	2015	bay laurel
1	44891.20013	4203434.553	2009	2014	bay laurel
1	45410.0194	4191661.852	2011	2012	bay laurel
1	37534.42289	4208433.71	2008	2015	bay laurel
1	41590.14424	4206155.352	2008	2015	bay laurel
4	43771.63806	4200273.729	2008	2015	bay laurel
1	33611.64297	4206899.713	2011	2014	bay laurel
1	39227.84343	4200186.731	2011	2015	bay laurel
1	48965.49799	4189057.774	2011	2014	bay laurel
1	-91170.63315	4466187.435	2008	2011	bay laurel
3	41871.79641	4148409.528	2008	2015	bay laurel
1	44763.61367	4144338.934	2011	2015	bay laurel
1	46706.04949	4148782.298	2009	2015	bay laurel
1	8750.848161	4230815.505	2011	2015	bay laurel
1	13247.43051	4213033.921	2010	2015	bay laurel
4	5541.324318	4225766.086	2011	2015	bay laurel
1	11779.97667	4227854.764	2011	2015	bay laurel
1	8435.159226	4234023.833	2011	2015	bay laurel
3	1949.92541	4224386.256	2011	2015	bay laurel
4	-7716.737729	4237080.407	2011	2013	bay laurel
3	14552.12898	4233654.389	2011	2015	bay laurel
2	8046.8731	4218480.009	2010	2013	bay laurel
4	8743.301124	4212699.704	2011	2012	bay laurel
4	11805.17465	4211994.426	2011	2015	bay laurel
4	10763.07708	4215096.406	2011	2015	bay laurel
1	8066.377527	4225075.825	2011	2015	bay laurel
1	42009.34276	4254967.49	2011	2014	bay laurel
1	42216.88857	4251345.561	2011	2013	bay laurel
1	23815.69581	4281028.676	2011	2014	bay laurel
1	26569.19288	4266275.239	2011	2015	bay laurel
1	38831.45259	4251862.411	2011	2014	bay laurel
1	32747.50639	4252996.655	2011	2014	bay laurel
1	32395.2364	4265933.283	2011	2013	bay laurel
1	38167.0839	4256998.072	2011	2015	bay laurel
2	24602.27351	4269937.748	2011	2015	bay laurel
1	25901.68992	4263438.99	2011	2012	bay laurel
2	24054.15867	4264111.419	2010	2014	bay laurel
1	38554.56178	4261556.464	2011	2013	bay laurel
3	37939.68136	4263193.381	2011	2013	bay laurel
1	19397.34488	4197020.351	2011	2015	bay laurel
4	44405.03017	4139994.94	2011	2012	bay laurel
3	43810.73852	4137422.929	2011	2014	bay laurel
3	37998.80066	4139599.881	2011	2015	bay laurel
1	4787.434594	4271975.7	2010	2015	bay laurel
1	2546.257533	4269766.158	2010	2013	bay laurel
3	20206.31637	4254193.695	2008	2014	bay laurel
2	20785.74574	4258000.05	2006	2012	bay laurel
1	-13833.52285	4267205.438	2010	2014	bay laurel
2	-11466.38735	4279216.573	2010	2011	bay laurel
1	-9028.519031	4261468.478	2010	2011	bay laurel
1	-13134.0939	4263788.383	2009	2014	bay laurel
1	-12822.3607	4261403.15	2011	2013	bay laurel
1	-7081.009089	4263587.424	2011	2013	bay laurel
1	-13069.27892	4275452.659	2010	2012	bay laurel
4	-19134.6995	4269162.36	2011	2015	bay laurel
4	-21959.90489	4267406.497	2011	2015	bay laurel
1	-7861.504215	4290524.149	2010	2015	bay laurel
2	-17313.55527	4278787.97	2010	2011	bay laurel
2	4777.2065	4279070.547	2009	2012	bay laurel
1	1721.215466	4300471.756	2011	2014	bay laurel
4	38550.06426	4143669.441	2011	2014	bay laurel
3	41436.6535	4143096.367	2011	2015	bay laurel
4	45076.94244	4134628.847	2011	2014	bay laurel
1	49642.51584	4138971.717	2010	2012	bay laurel
3	36592.29103	4146139.292	2011	2015	bay laurel
1	34857.82874	4155242.543	2008	2015	bay laurel
1	38351.05063	4151743.643	2008	2015	bay laurel
3	63884.81513	4034448.326	2010	2014	bay laurel
4	62772.63763	4046358.541	2007	2014	bay laurel
1	66049.92419	4025433.12	2009	2015	bay laurel
4	66575.8876	4027767.477	2009	2014	bay laurel
4	86883.26811	4001708.403	2007	2014	bay laurel
4	101176.1281	3982336.929	2010	2013	bay laurel
4	80134.04356	4013035.383	2010	2013	bay laurel
3	63645.36847	4044635.643	2011	2014	bay laurel
1	68415.83262	4028466.428	2009	2014	bay laurel
2	73703.35452	4021333.915	2010	2014	bay laurel
3	77661.87299	4016808.856	2011	2014	bay laurel
4	98098.60064	3989564.87	2011	2014	bay laurel
2	99199.58027	3992172.178	2010	2014	bay laurel
3	100490.883	3986730.163	2011	2014	bay laurel
4	99422.69548	3986466.789	2011	2014	bay laurel
4	99967.8535	3983303.188	2005	2014	bay laurel
4	85123.42973	4003548.831	2011	2014	bay laurel
1	107957.6665	3973752.785	2011	2014	bay laurel
1	107793.6302	3970089.684	2011	2015	bay laurel
1	92421.45118	3997130.003	2011	2014	bay laurel
1	93399.96327	3995582.992	2009	2014	bay laurel
1	95009.23568	3996273.482	2009	2011	bay laurel
1	109906.6539	3968853.861	2011	2015	bay laurel
1	73697.62912	4019924.283	2009	2014	bay laurel
1	103732.0803	3976890.228	2010	2013	bay laurel
1	89416.07627	4000328.137	2010	2013	bay laurel
2	78072.72096	4021854.255	2010	2013	bay laurel
1	80390.11181	4022079.129	2010	2013	bay laurel
2	85937.81807	4005795.125	2011	2014	bay laurel
1	102063.9999	3980446.544	2011	2014	bay laurel
3	-77456.98753	4473941.847	2008	2013	bay laurel
1	-88510.91431	4595260.195	2008	2014	bay laurel
1	-90854.39767	4654823.8	2008	2014	bay laurel
1	-87049.91279	4603349.825	2008	2014	bay laurel
1	-82361.93549	4583681.661	2008	2009	bay laurel
1	-88098.79552	4585692.21	2008	2012	bay laurel
1	-79856.14222	4452405.854	2008	2013	bay laurel
1	-75627.36283	4435825.51	2008	2013	bay laurel
1	-94754.57675	4490421.661	2008	2014	bay laurel
1	-88815.11595	4487162.715	2008	2014	bay laurel
1	-90529.54247	4496421.284	2008	2011	bay laurel
1	-77708.95916	4375123.814	2008	2012	bay laurel
1	-85621.62098	4375645.974	2008	2013	bay laurel
2	21649.55689	4172880.553	2010	2014	bay laurel
1	14226.70443	4265795.043	2006	2012	bay laurel
1	7895.618076	4263321.654	2006	2010	bay laurel
3	26773.12407	4171338.016	2008	2013	bay laurel
1	65755.91505	4051680.575	2008	2015	bay laurel
1	68976.51024	4049698.783	2008	2015	bay laurel
2	66689.97431	4044309.767	2008	2015	bay laurel
3	71925.72586	4041772.739	2008	2015	bay laurel
1	41488.46737	4152063.023	2008	2014	bay laurel
2	36314.52512	4139515.462	2008	2012	bay laurel
1	18323.03544	4194288.894	2008	2015	bay laurel
1	19370.54616	4194394.665	2008	2015	bay laurel
1	49401.42991	4212608.77	2008	2014	bay laurel
1	-94358.57885	4468811.367	2008	2010	bay laurel
1	47634.61883	4143949.401	2009	2015	bay laurel
1	49707.33043	4146700.066	2009	2013	bay laurel
1	-22710.33894	4314526.066	2009	2014	bay laurel
1	37267.59216	4215350.716	2008	2009	bay laurel
1	50960.31227	4205725.762	2009	2013	bay laurel
1	-87200.53639	4484480.244	2008	2014	bay laurel
1	-9742.266316	4272421.045	2010	2015	bay laurel
1	3054.902969	4267209.082	2010	2014	bay laurel
2	8918.638856	4271303.615	2010	2015	bay laurel
1	-13297.12676	4272162.036	2010	2014	bay laurel
3	25659.55758	4252452.072	2008	2012	bay laurel
1	-13341.82675	4269598.377	2010	2015	bay laurel
4	-15818.80502	4272037.297	2010	2012	bay laurel
1	6004.804552	4251374.917	2010	2013	bay laurel
1	52568.37432	4203887.09	2010	2013	bay laurel
1	72428.38131	4161570.145	2010	2013	bay laurel
2	14165.02804	4205940.33	2010	2012	bay laurel
3	45126.38717	4155830.46	2010	2013	bay laurel
3	17367.74388	4220676.107	2005	2015	bay laurel
4	133.357411	4213613.516	2005	2012	bay laurel
4	-713.1067347	4214525.394	2005	2013	bay laurel
3	54655.6652	4115698.228	2005	2013	bay laurel
1	35822.71631	4196785.495	2008	2009	bay laurel
1	28768.83792	4170600.334	2008	2013	bay laurel
1	70554.04445	4166751.753	2009	2015	bay laurel
1	-86412.98929	4483396.51	2008	2009	bay laurel
1	-89038.85005	4489277.554	2008	2014	bay laurel
2	-89071.52425	4462460.812	2008	2013	bay laurel
1	-87813.66621	4602669.566	2008	2014	bay laurel
1	-74106.82995	4482476.84	2008	2009	bay laurel
2	-75586.05594	4481111.055	2008	2011	bay laurel
1	-86502.91496	4603479.3	2008	2009	bay laurel
1	-78269.36505	4579105.487	2008	2009	bay laurel
2	-83157.33931	4476091.113	2008	2014	bay laurel
1	-96285.05198	4553805.251	2008	2013	bay laurel
1	-86659.54365	4531295.631	2008	2014	bay laurel
1	-85374.10365	4504744.759	2008	2013	bay laurel
1	-114687.0082	4516759.314	2008	2010	bay laurel
1	-105196.1028	4519011.757	2008	2010	bay laurel
1	-96335.4132	4500630.231	2008	2010	bay laurel
1	-90637.09412	4489191.839	2008	2010	bay laurel
1	-88130.16173	4493106.496	2008	2012	bay laurel
1	-81687.53587	4479565.616	2008	2014	bay laurel
1	-88973.44846	4494863.247	2008	2011	bay laurel
1	-97149.79968	4489765.245	2008	2013	bay laurel
1	-105458.9166	4477817.558	2008	2012	bay laurel
1	-103681.9753	4465207.416	2008	2014	bay laurel
1	-99649.96158	4455009.503	2008	2014	bay laurel
1	-90459.51385	4462240.522	2008	2009	bay laurel
2	-86755.07489	4465387.641	2008	2011	bay laurel
1	-94214.99229	4500866.137	2009	2010	bay laurel
1	-92765.09535	4500186.351	2009	2014	bay laurel
1	-92286.86788	4498204.23	2009	2010	bay laurel
1	-90772.88422	4467737.071	2010	2012	bay laurel
1	-73108.64184	4550367.581	2010	2013	bay laurel
1	-78262.35463	4563342.847	2010	2014	bay laurel
1	-77906.2635	4567391.678	2010	2014	bay laurel
1	-77195.25723	4562170.716	2010	2014	bay laurel
1	-97338.12423	4487112.839	2010	2012	bay laurel
1	-75983.93703	4556366.096	2010	2014	bay laurel
1	-76172.12804	4558250.603	2010	2014	bay laurel
1	-73143.55003	4355090.953	2010	2013	bay laurel
1	-91272.74637	4658057.443	2010	2012	bay laurel
1	-88943.39662	4651603.325	2010	2014	bay laurel
1	-88752.579	4651075.946	2010	2014	bay laurel
1	-76480.42981	4553873.021	2010	2014	bay laurel
4	-23746.60824	4285620.275	2007	2010	bay laurel
3	-80038.59678	4460578.13	2011	2013	bay laurel
4	-82523.93325	4463691.613	2005	2011	bay laurel
4	-69509.3336	4487325.021	2011	2012	bay laurel
1	-22985.18692	4311776.28	2008	2014	bay laurel
1	5798.369866	4269962.508	2011	2014	bay laurel
1	-9100.155312	4266994.021	2011	2012	bay laurel
1	-119.9976702	4300081.593	2010	2014	bay laurel
4	19836.37206	4220098.606	2007	2015	bay laurel
3	40891.62086	4249126.773	2007	2015	bay laurel
4	50376.44288	4112532.665	2007	2012	bay laurel
1	50931.34817	4203887.797	2012	2015	bay laurel
1	38209.75619	4198137.435	2012	2015	bay laurel
1	67415.45628	4171936.296	2012	2015	bay laurel
1	72425.8668	4157966.437	2012	2013	bay laurel
1	71883.38844	4163791.273	2012	2013	bay laurel
4	4162.512814	4226750.516	2012	2015	bay laurel
3	29432.69124	4255253.893	2012	2015	bay laurel
3	43372.91984	4249021.108	2012	2013	bay laurel
2	31741.70816	4256851.229	2012	2015	bay laurel
1	38462.96074	4244826.832	2012	2015	bay laurel
1	18070.18538	4197399.756	2012	2015	bay laurel
1	19923.74021	4190770.547	2012	2015	bay laurel
1	47992.68896	4104699.365	2012	2013	bay laurel
1	34538.10788	4159872.165	2012	2015	bay laurel
1	-74036.64825	4567473.977	2012	2014	bay laurel
2	-56530.70533	4474361.987	2012	2014	bay laurel
1	-98004.06076	4453581.254	2012	2014	bay laurel
1	-72571.93539	4383084.277	2012	2013	bay laurel
1	-76891.03635	4383009.881	2012	2013	bay laurel
1	-76101.37577	4381763.472	2012	2013	bay laurel
1	-65201.14471	4376504.886	2012	2013	bay laurel
1	-12285.44632	4231119.575	2013	2015	bay laurel
1	11999.57706	4229112.548	2013	2015	bay laurel
1	43971.12506	4217847.445	2013	2015	bay laurel
1	49643.00864	4215601.613	2013	2015	bay laurel
1	42968.88588	4208288.605	2013	2014	bay laurel
1	72115.34222	4203067.429	2013	2015	bay laurel
1	68456.81721	4200800.212	2013	2015	bay laurel
1	73859.82664	4200640.783	2013	2015	bay laurel
1	156730.4527	3922892.729	2013	2015	bay laurel
1	185528.2772	3902641.497	2013	2015	bay laurel
1	134881.4192	3944408.052	2013	2015	bay laurel
1	170740.5389	3914541.919	2013	2015	bay laurel
1	168674.7506	3911177.476	2013	2015	bay laurel
1	167866.0003	3913803.66	2013	2015	bay laurel
1	167736.1705	3916019.415	2013	2015	bay laurel
1	165201.7484	3914353.028	2013	2015	bay laurel
1	149937.5521	3938731.734	2013	2015	bay laurel
1	131440.4687	3948965.048	2013	2015	bay laurel
1	168987.7519	3906200.599	2013	2015	bay laurel
1	169040.2149	3906907.542	2013	2015	bay laurel
1	141141.303	3942903.362	2013	2014	bay laurel
1	138247.9121	3944226.686	2013	2015	bay laurel
1	161519.497	3931145.012	2013	2015	bay laurel
1	163247.6406	3929651.821	2013	2015	bay laurel
1	158583.3704	3930619.805	2013	2015	bay laurel
1	157276.1268	3930903.278	2013	2015	bay laurel
1	184165.4017	3904675.962	2013	2014	bay laurel
1	159151.4314	3926044.873	2013	2015	bay laurel
1	164215.6022	3929604.661	2013	2015	bay laurel
1	170265.4027	3910987.873	2013	2015	bay laurel
1	161971.7137	3908607.871	2013	2015	bay laurel
1	151047.2154	3941731.622	2013	2015	bay laurel
1	155101.4781	3939669.43	2013	2015	bay laurel
1	-82458.67495	4360023.312	2013	2014	bay laurel
1	-79366.29837	4359590.786	2013	2014	bay laurel
1	-79044.77782	4325309.38	2013	2014	bay laurel
1	-77500.37618	4323247.202	2013	2014	bay laurel
1	74050.79418	4149495.688	2013	2014	bay laurel
1	53094.3488	4135995.658	2013	2015	bay laurel
3	39755.6461	4121122.774	2013	2014	bay laurel
1	-19099.5138	4309089.699	2013	2015	bay laurel
2	52796.48293	4122640.665	2014	2015	bay laurel
2	52013.1884	4122890.076	2014	2015	bay laurel
2	47833.28774	4124853.897	2014	2015	bay laurel
1	-20992.70916	4317303.547	2014	2015	bay laurel
1	86760.45404	4037331.292	2014	2015	bay laurel
1	70200.80609	4022571.262	2014	2015	bay laurel
1	170291.9822	3915705.319	2014	2015	bay laurel
1	160574.4803	3908939.129	2014	2015	bay laurel
