# Supplementary material
Source: MDPI journal article supplement (https://www.mdpi.com/1999-4907/8/8/293)
Supplement: s1 [file s1 › NOTE S1.docx]

**Assessment of the relation between GPS median error and spatial resolution of the grid system**

The MC experiment simulated the process of coordinates collection with a GPS, estimating the location of a single tree, set in the origin (0,0) of a Cartesian projected reference system. The GPS median radial error was set from a minimum of 1 m to a maximum of 3000 m, with 1 m-step sequential increase. Three parameters were fixed to run the MC experiment: the number of replications (NR = 103), the number of simulations (NS = 103) and the number of iterations (NI = 3·103). The MC algorithm was designed and run according to the following steps:

1. Define a virtual GPS with radial error *r* Rayleigh-distributed, with = 1 m;
2. Parametrize the Rayleigh distribution calculating *σ* by setting;
3. Extract the random polar coordinates (*r*, α) for NR points by sampling NR random *r* values from the above Rayleigh distribution and NR random trigonometric angles α (rad) from a uniform distribution limited between 0 and 2π [80];
4. Convert the polar coordinates of the NR points into Euclidean coordinates;
5. Extract the maximum value from the associated triangular Euclidean distance matrix *dMAX* and set ;
6. Store the value of and the corresponding value of **;**
7. Repeat steps 1-6 for NS times;
8. Repeat step 1-7 for NR times by adding, at each new loop, 1 m to the previous value;
9. Fit a linear regression model with no intercept on the stored values of and to assess .
