# Supplementary material
Source: MDPI journal article supplement (https://www.mdpi.com/1999-4907/8/8/293)
Supplement: s1 [file s1 › NOTE S2.docx]

**Technical details about the design of the algorithm**

The algorithm designed for the classifier was structured in two blocks. The first block defines the grid-based system once implemented with the function according to the following steps:

1. Provide the coordinates of trees locations *xT’* and *yT’*(from the available citizen science database) and the median value *ε** ofthe GPS radial error (from the manufacturer, from in field trials of from the literature) in input;

2. Calculate the spatial resolution of the grid-based system from , with ;

3. Determine the number of horizontal and vertical pixels of the grid dividing the range of *xT’* and *yT’* by the value obtained in step 2, and add a 2-pixels buffer to all cardinal directions;

4. Identify the coordinates of the left-bottom corner of as and , with and being independent and random numbers from a uniform PDF limited between 0 and 1;

5. Assign to each pixel a unique code and attach it to all elements of *T’* falling into the same pixel, but only on condition that more than one element is included within the same pixel’s border (i.e. define the set ), otherwise assign the NA (not available) value (i.e. define the set );

6. Return the codes list *γ* assigned to each element of *T’*, NA included.

The second block of the algorithm implements into in order to classify the resampled trees into recovered or not recovered ones. Not recovered trees are further divided into trees that have never been infected, trees with a constant and positive infection status, and trees switching their status from not infected to infected. The steps designed for this second block are listed below:

1. Provide as input the coordinates of trees locations *xT’* and *yT’*, the codes list *γ* gathered from the previous block, as well as the infection status (set *I*) and the sampling time (set *S*) of each *T’* element, as reported in the citizen science database in input;

2. Select from *T’*, *I* and *S* a subset of elements with the same *γ* value;

3. For all elements included in this subset, check if the first (*Ss*) and the last sampling time (*Se*) satisfy the condition , moreover, in case for all generic locations and , check if ;

4. If conditions of step 3 are satisfied, the subset is a subset;

5. Repeat steps 2 and 3 until all unique *γ* values have been considered, NA excluded, defining the whole set and (i.e. set deriving from the difference between and ;

6. Assign to the elements of sharing the same *γ* value a different switch-code depending on which of the following conditions is met: (switch-code 1), (switch-code 2), (switch-code 3), (switch-code 4);

7. Repeat step 6 until all unique *γ* values have been considered and all elements of are endowed with a switch-code;

8. Average the coordinates of all tree locations sharing the same *γ* and switch-code, then assign the resulting elements to the set in bijective association with the switch-code of the parent-tree locations of they derive from;

9. Provide as output a dataset of the elements including the associated coordinates, switch-code, *Ss* and *Se* values. Recovered trees are included in the set, whose elements are uniquely identified by the switch-code value 3. All other switch-codes refer to trees that have never been infected (1), trees with a constant and positive infection status (4), and trees switching their status from not infected to infected (2).

Since the classifier was designed including within a stochastic component (i.e. the grid vertex coordinates *xs* and *ys*), alternative scenarios estimating *R* are possible. Their assessment can be achieved by embedding as a sliding grid system into through iterate runs of the two algorithm blocks (i.e. loop).
