# Supplementary material
Source: MDPI journal article supplement (https://www.mdpi.com/1999-4907/8/8/293)
Supplement: s1 [file s1 › NOTE S3.docx]

**Analysis of the association between environmental factors and recovery from *P. ramorum* infections: complementary analyses**

**Methods**

From the dataset of resampled trees within the set and from the dataset of recovered trees *R*, two-dimensional Gaussian KDE matrices and their associated rasters were derived as described above, tuning the cells width to 4 km and the bandwidth to 40 km. Raster-associated matrices of the environmental factors were correlated with KDE matrices of recovered trees. For each analysis, cell-wise association between matrices was obtained with the bilinear method resampling of the raster with the highest spatial resolutions, which was aligned to the lowest resolution one [1, 2]. Both simple and partial element-wise correlations were tested with the Spearman’s *ρxy* and *ρxy.z* coefficients, respectively [3]. The control variable for partial correlations was represented by the KDE of all trees included within the set to account for potential sampling biases. Analyses were performed both for bay laurel and for overall species, the latter including bay laurel, oaks and tanoaks.

**Results**

**Kernel density estimates (KDE) analyses**

The rasters obtained for scenario-10m (Figure 1) and scenario-500 m (Figure 2) showed the localized presence of KDE peaks for both resampled and recovered trees, regardless of the host species. KDE peaks localization and relative magnitude were partially overlapping between recoveredand resampled-associated rasters, with variable patterns depending on the scenario.

**Figure 1.** Raster maps deriving from two-dimensional Gaussian kernel density estimates (KDE) for scenario-10m. Panels **(a)** and **(b)** refer to recovered trees (i.e. set *R*) and resampled trees (i.e. set ), respectively, combining bay laurels, oaks and tanoaks. Panels **(c)** and **(d)** refer to same set of trees, but considering only bay laurels. A color gradient from blue to red shows the transition between low and high values of KDE, whose minimum and maximum are indicated in the legend.

**Figure 2** Raster maps deriving from two-dimensional Gaussian kernel density estimates (KDE) for scenario-500m. For details, refer to figure 6.

A total of 60 out of 72 simple and partial element-wise correlations between KDE and environmental factors matrices displayed significant Spearman’s *ρ­xy* or *ρxy.z* coefficients (*P* < 0.05) (Table 1). All *ρxy.z* coefficients were lower in absolute value than the corresponding *ρ­xy*, with the exception of Bld, whose absolute *ρxy.z* were larger than the associated *ρ­xy*. Among climatic factors, all temperatures resulted significantly (*P* < 0.05) and positively correlated with the KDE of recovered trees, regardless of the host species and the scenario, with *ρ­xy* ranging from 0.345 to 0.503 and *ρ­xy.z* from 0.240 to 0.333. Conversely, significant (*P* < 0.05) but negative correlations were detected between P and the KDE of recovered trees, with *ρ­xy* comprised between -0.537 and -0.402 and *ρ­xy.z* included between -0.463 and -0.223 depending on the host species and scenario. Among topographic factors, TPI was never significantly correlated to the KDE of recovered trees (*P* > 0.05), while El, Sl and TRI displayed negative and significant *ρ­xy* and *ρxy.z* coefficients in 23 out of 24 cases. Whenever significant (*P* < 0.05), the absolute values of correlations coefficients and partial correlation coefficients were lower for topographic factors than for climatic ones, ranging from 0.124 to 0.240 for *ρ­xy* and from 0.013 to 0.114 for *ρxy.z*. Finally, Bld displayed negative correlation and partial correlation coefficients regardless of the host species and scenarios. While significant values (*P* < 0.05) were achieved by all *ρxy.z* related to Bld, which were comprised between -0.188 and -0.129, the associated *ρ­xy* were significant (*P* < 0.05) only in scenario-500m, attaining -0.143 and -0.123 depending on the host species.

**Table 1.** Element-wise correlations and partial correlations between kernel density estimates (KDE) matrices of recovered trees and environmental factors matrices. For each scenario and host species tested, Spearman’s *ρ­xy* and and *ρxy.z* are reported along with their *P*-values. The symbol * marks significant coefficients (*P* < 0.05)

| **Scenario** | **Species** | **Environmental**  **factor** | ***ρxy*** | ***P*-value**  ***ρxy*** | ***ρxy.z*** | ***P*-value**  ***ρxy.z*** |  | |
| --- | --- | --- | --- | --- | --- | --- | --- | --- |
| 10 m | Overall species | Tmin | 0.444 * | < 0.001 | 0.266 * | < 0.001 |  |  |
|  |  | Tmax | 0.349 * | < 0.001 | 0.246 * | < 0.001 |  |  |
|  |  | Tmean | 0.482 * | < 0.001 | 0.316 * | < 0.001 |  |  |
|  |  | P | -0.402 * | < 0.001 | -0.259 * | < 0.001 |  |  |
|  |  | El | -0.169 * | < 0.001 | -0.020 * | < 0.001 |  |  |
|  |  | Sl | -0.124 * | < 0.001 | -0.050 * | < 0.001 |  |  |
|  |  | TRI | -0.151 * | < 0.001 | -0.039 * | < 0.001 |  |  |
|  |  | TPI | -0.002 | 0.663 | -0.002 | 0.759 |  |  |
|  |  | Bld | -0.033 | 0.278 | -0.129 * | < 0.001 |  |  |
|  | Bay laurel | Tmin | 0.463 * | < 0.001 | 0.289 * | < 0.001 |  |  |
|  |  | Tmax | 0.365 * | < 0.001 | 0.240 * | < 0.001 |  |  |
|  |  | Tmean | 0.503 * | < 0.001 | 0.316 * | < 0.001 |  |  |
|  |  | P | -0.439 * | < 0.001 | -0.223 * | < 0.001 |  |  |
|  |  | El | -0.174 * | < 0.001 | 0.001 | 0.919 |  |  |
|  |  | Sl | -0.128 * | < 0.001 | -0.022 * | < 0.001 |  |  |
|  |  | TRI | -0.165 * | < 0.001 | -0.013 * | 6.366·10-03 |  |  |
|  |  | TPI | -0.003 | 0.549 | -0.001 | 0.842 |  |  |
|  |  | Bld | -0.020 | 0.519 | -0.160 * | < 0.001 |  |  |
| 500 m | Overall species | Tmin | 0.372 * | < 0.001 | 0.259 * | < 0.001 |  |  |
|  |  | Tmax | 0.345 * | < 0.001 | 0.274 * | < 0.001 |  |  |
|  |  | Tmean | 0.440 * | < 0.001 | 0.333 * | < 0.001 |  |  |
|  |  | P | -0.524 * | < 0.001 | -0.463 * | < 0.001 |  |  |
|  |  | El | -0.240 * | < 0.001 | -0.113 * | < 0.001 |  |  |
|  |  | Sl | -0.183 * | < 0.001 | -0.114 * | < 0.001 |  |  |
|  |  | TRI | -0.207 * | < 0.001 | -0.113 * | < 0.001 |  |  |
|  |  | TPI | -0.003 | 0.593 | -0.001 | 0.806 |  |  |
|  |  | Bld | -0.143 * | < 0.001 | -0.174 * | < 0.001 |  |  |
|  | Bay laurel | Tmin | 0.422 * | < 0.001 | 0.256 * | < 0.001 |  |  |
|  |  | Tmax | 0.394 * | < 0.001 | 0.241 * | < 0.001 |  |  |
|  |  | Tmean | 0.499 * | < 0.001 | 0.312 * | < 0.001 |  |  |
|  |  | P | -0.537 * | < 0.001 | -0.379 * | < 0.001 |  |  |
|  |  | El | -0.207 * | < 0.001 | -0.017 * | < 0.001 |  |  |
|  |  | Sl | -0.163 * | < 0.001 | -0.041 * | < 0.001 |  |  |
|  |  | TRI | -0.199 * | < 0.001 | -0.052 * | < 0.001 |  |  |
|  |  | TPI | -0.003 | 0.497 | 0.000 | 0.9674 |  |  |
|  |  | Bld | -0.123 * | < 0.001 | -0.188 * | < 0.001 |  |  |

**References**

1. Kennedy, H. Introduction to 3D Data: Modeling with ArcGIS 3D Analyst and Google Earth; John Wiley & Sons: Hoboken, NJ, USA, 2009.
2. Mitas, L.; Mitasova, H. Spatial interpolation. In: *Geographical Information Systems: Principles, Techniques, Management and Applications*; Longley, P., Goodchild, M.F., Maguire, D.J., Rhind, D.W., Eds.; John Wiley and Sons: New York, NY, USA, 1999, Volume 1, pp. 481–492.
3. Crawley, M.J. *The R Book*, 2nd ed.; John Wiley & Sons: Chichester, UK, 2013.
