# Supplementary material
Source: MDPI journal article supplement (https://www.mdpi.com/1999-4907/8/8/293)
Supplement: s1 [file s1 › NOTE S4.docx]

**Assessment of equivalence among alternative datasets detected for oaks and tanoaks**

detected a single dataset displaying the maximum number of elements for for oaks (in scenario-500m). Four alternative datasets were detected for oaks in scenario-10m, while two and three alternative datasets resulted from tanoak in scenario-10m and scenario-500m, respectively. Comparisons among KDE matrices with the Kruskal-Wallis, Mann–Whitney and Fligner-Killeen test showed no significant differences among means and variances in all cases (*P* > 0.05), confirming the equivalence among alternative datasets (Table 1).

**Table 1.** Results of the Kruskal-Wallis, Mann–Whitney and Fligner-Killeen tests comparing mean and variance of two-dimensional Gaussian kernel density estimates (KDE) matrices derived from alternative datasets for the same host species and scenarios. The alternative datasets, if present, are indicated with the corresponding seed number (see text). Datasets marked with the symbol * were randomly selected to perform further analyses. *P* indicates the *P*-value of the associated test.

| **Species** | **Scenario** | **Alternative datasets tested (seeds)** | **Kruskal-Wallis**  **test** | **Mann–Whitney**  **test** | **Fligner-Killeen**  **test** |
| --- | --- | --- | --- | --- | --- |
| Qaks | 10 m | 75256, 181536*, 444729, 872654 | *P* = 1.000 | - | *P* = 1.000 |
| Tanoak | 10 m | 154422, 715338* | - | *P* = 0.397 | *P* = 0.925 |
| Tanoak | 500 m | 158804, 382759, 850356* | *P* = 0.390 | - | *P* = 0.134 |
