# Supplementary material
Source: MDPI journal article supplement (https://www.mdpi.com/1999-4907/8/8/293)
Supplement: s1 [file s1 › TABLE S1.docx]

**Table S1.** Binary logistic regressions modelling the probability of recovery among trees whose infection status to *P. ramorum* was positive at least once. For each scenario, models are identified based on the predictors included. Coefficients (*β*) associated with the predictors and the intercepts (*β0*) are reported along with their *P*-values and 95% confidence intervals (95% CI). The 95% CI resulting from Monte Carlo simulations (MC 95% CI), assessing model robustness against a putative misclassification rate of 15% of the algorithm, are indicated for each *β* coefficient. Models are ranked by increasing values of Akaike information criterion (AIC) and by decreasing values of its weight (AICw). The symbol * indicates significant coefficients (*P* < 0.05), while the symbol ‡ marks coefficients whose *P*-value is not significant, although the associated 95% CI excludes 0. For predictors acronyms details, see the main text.

| **Model**  **Scenario-10m** | **Predictors** | **Coefficients *(β)***  **and intercept *(β0)*** | ***P*-value** | **95% CI** | **MC 95% CI** | **AIC** | **AICw** |
| --- | --- | --- | --- | --- | --- | --- | --- |
| P | P | -1.63·10-3 * | 1.47·10-4 | -2.53·10-3; -8.36·10-4 | -1.55·10-3;-4.05·10-4 | 435.39 | 0.871 |
|  | intercept | 5.81·10-1 | 9.56·10-2 | -8.25·10-2; 1.29 | - |  |  |
| Tmean + El | Tmean | 6.26·10-1 * | 2.74·10-3 | 2.24·10-1; 1.04 | 1.21·10-1; 7.00·10-1 | 442.37 | 0.027 |
|  | El | -8.98·10-4 | 9.24·10-2 | -1.96·10-3; 1.33·10-4 | -1.35·10-3;1.48·10-4 |  |  |
|  | intercept | -9.48* | 1.92·10-3 | -15.62·10; -3.62 | - |  |  |
| Tmax + Long | Tmax | 3.01·10-1 * | 4.75·10-3 | 9.37·10-2; 5.13·10-1 | 5.02·10-2;3.46·10-1 | 442.81 | 0.021 |
|  | Long | 5.26·10-6 | 6.20·10-2 | -5.98·10-8; 1.10·10-5 | -5.52·10-7; 7.23·10-6 |  |  |
|  | intercept | -7.09 * | 1.26·10-3 | -1.15·10; -2.82 | - |  |  |
| Sl + Long | Sl | -5.93·10-2 * | 1.08·10-2 | -1.06·10-1; -1.46·10-2 | -7.08·10-2; -5.80·10-3 | 443.27 | 0.017 |
|  | Long | 5.85·10-6 * | 3.72·10-2 | 5.54·10-7; 1.16·10-5 | -1.36·10-7; 7.62·10-6 |  |  |
|  | intercept | -3.78·10-1 | 1.39·10-1 | -8.82·10-1; 1.21·10-1 | - |  |  |
| Tmean | Tmean | 6.51·10-1 * | 1.98·10-3 | 2.46·10-1; 1.07 | 1.32·10-1; 7.14·10-1 | 443.27 | 0.017 |
|  | intercept | -1.02·10 * | 8.99·10-4 | -1.63·10; -4.29 | - |  |  |
| Sl + Lat | Sl | -5.80·10-2 * | 1.25·10-2 | -1.05·10-1; -1.34·10-2 | -7.01·10-2; -5.10·10-3 | 444.17 | 0.011 |
|  | Lat | -1.63·10-6 | 5.81·10-2 | -3.38·10-6; 4.16·10-9 | -2.24·10-6;1.49·10-7 |  |  |
|  | intercept | 6.61 | 6.58·10-2 | -2.20·10-1; 1.39·10 | - |  |  |
| Tmax | Tmax | 3.12·10-1 * | 3.26·10-3 | 1.06·10-1; 5.23·10-1 | 5.97·10-2; 3.54·10-1 | 444.57 | 0.009 |
|  | intercept | -7.13 * | 1.10·10-3 | -1.15·10; -2.89 | - |  |  |
| TRI + Long | TRI | -6.97·10-3 * | 2.08·10-2 | -1.30·10-2; -1.15·10-3 | -8.74·10-3; -3.27·10-4 | 444.58 | 0.009 |
|  | Long | 5.73·10-6 * | 4.47·10-2 | 3.59·10-7; 1.16·10-5 | -2.98·10-7; 7.56·10-6 |  |  |
|  | intercept | -3.10·10-1 | 2.99·10-1 | -8.97·10-1; 2.76·10-1 | - |  |  |
| TRI + Lat | TRI | -6.89·10-3 * | 2.22·10-2 | -1.29·10-2; -1.08·10-3 | -8.70·10-3; -2.93·10-4 | 445.32 | 0.006 |
|  | Lat | -1.62·10-6 | 6.44·10-2 | -3.42·10-6; 4.03·10-8 | -2.24·10-6; 1.89·10-7 |  |  |
|  | intercept | 6.66 | 7.00·10-2 | -2.98·10-1; 1.42·10 | - |  |  |
| Sl | Sl | -5.81·10-2 * | 1.23·10-2 | -1.05·10-1; -1.36·10-2 | -7.01·10-2; -5.43·10-3 | 445.99 | 0.004 |
|  | intercept | -1.87·10-1 | 4.30·10-1 | -6.51·10-1; 2.79·10-1 | - |  |  |
| TRI | TRI | -7.01·10-3 * | 1.98·10-2 | -1.30·10-2; -1.21·10-3 | -8.81·10-3; -4.26·10-4 | 446.97 | 0.003 |
|  | intercept | -1.08·10-1 | 7.02·10-1 | -6.61·10-1; 4.47·10-1 | - |  |  |
| Tmin + TRI | Tmin | 8.16·10-2 | 5.39·10-1 | -1.77·10-1; 3.45·10-1 | -1.33·10-1; 2.39·10-1 | 447.40 | 0.002 |
|  | TRI | -6.80·10-3 * | 2.42·10-2 | -1.28·10-2; -9.88·10-4 | -8.71·10-3 -2.87·10-4 |  |  |
|  | intercept | -8.11·10-1 | 4.83·10-1 | -3.10; 1.44 | - |  |  |
| Sl + TPI | Sl | -5.78·10-2 * | 1.30·10-2 | -1.05·10-1; -1.32·10-2 | -7.01·10-2; -5.16·10-3 | 447.94 | 0.002 |
|  | TPI | -3.84·10-4 | 8.25·10-1 | -3.81·10-3; 3.01·10-3 | -2.69·10-3; 2.17·10-3 |  |  |
|  | intercept | -1.95·10-1 | 4.16·10-1 | -6.67·10-1; 2.76·10-1 | - |  |  |
| TRI + TPI | TRI | -7.10·10-3 * | 1.89·10-2 | -1.32·10-2; -1.28·10-3 | -8.92·10-3; -4.67·10-4 | 448.71 | 0.001 |
|  | TPI | -9.16·10-4 | 6.10·10-1 | -4.49·10-3; 2.58·10-3 | -3.11·10-3; 1.93·10-3 |  |  |
|  | intercept | -1.14·10-1 | 6.88·10-1 | -6.69·10-1; 4.43·10-1 | - |  |  |
| Long | Long | 5.18·10-6 ‡ | 5.53·10-2 | 6.58·10-8; 1.07·10-5 | -3.52·10-7; 7.15·10-6 | 451.82 | 0.000 |
|  | intercept | -9.19·10-1 * | 1.16·10-9 | -1.23; -6.33·10-1 | - |  |  |
| TPI | TPI | -6.84·10-4 | 6.87·10-1 | -4.04·10-3; 2.63·10-3 | -2.84·10-3; 1.92·10-3 | 452.46 | 0.000 |
|  | intercept | -7.33·10-1 * | 2.74·10-10 | -9.64·10-1; -5.08·10-1 | - |  |  |
| El | El | -9.46·10-4 | 7.33·10-2 | -2.00·10-3; 7.36·10-5 | -1.36·10-3; 1.11·10-4 | 452.46 | 0.000 |
|  | intercept | -4.00·10-1 | 6.50·10-2 | -8.28·10-1; 2.31·10-2 | - |  |  |
| Lat | Lat | -1.44·10-6 | 8.08·10-2 | -3.13·10-6; 1.31·10-7 | -2.10·10-6; 2.05·10-7 | 452.55 | 0.000 |
|  | intercept | 5.29 | 1.25·10-1 | -1.29; 1.23·10 | - |  |  |
| Tmin | Tmin | 5.64·10-2 | 6.63·10-1 | -1.96·10-1; 3.12·10-1 | -1.44·10-1; 2.19·10-1 | 453.22 | 0.000 |
|  | intercept | -1.21 | 2.75·10-1 | -9.64·10-1; -5.21·10-1 | - |  |  |
| null | intercept | -7.40·10-1 * | 5.66·10-11 | -9.64·10-1; -5.21·10-1 | - | 453.76 | 0.000 |
| Bld | Bld | 1.76·10-3 | 2.86·10-1 | -1.53·10-3; 5.03·10-3 | - 1.26·10-3; 3.51·10-3 | - | - |
|  | intercept | -1.24 * | 8.85·10-3 | -2.18; -0.31 | - |  |  |
| **Model**  **Scenario-500m** | **Predictors** | **Coefficients *(β)***  **and intercept *(β0)*** | ***P*-value** | **95% CI** | **MC 95% CI** | **AIC** | **AICw** |
| P + TRI | P | -3.29·10-3 * | 8.35·10-3 | -6.03·10-3; -1.09·10-3 | -3.85·10-3; -4.63·10-4 | 95.29 | 0.375 |
|  | TRI | -8.30·10-3 | 1.25·10-1 | -1.97·10-2; 1.82·10-3 | -1.38·10-2; 1.57·10-3 |  |  |
|  | intercept | 2.93 * | 1.40·10-2 | 7.67·10-1; 5.50 | - |  |  |
| P + Sl | P | -3.36·10-3 * | 7.38·10-3 | -6.12·10-3; -1.15·10-3 | -3.91·10-3; -4.92·10-4 | 97.19 | 0.146 |
|  | Sl | -3.20·10-2 | 4.26·10-1 | -1.15·10-1; 4.45·10-2 | -8.28·10-2; 3.36·10-2 |  |  |
|  | intercept | 2.57 * | 2.88·10-2 | 4.39·10-1; 5.11 | - |  |  |
| Tmax + P | Tmax | 3.77·10-1 | 8.59·10-2 | -3.96·10-2; 8.30·10-1 | -5.62·10-2; 5.64·10-1 | 97.56 | 0.121 |
|  | P | -3.14·10-3 * | 1.24·10-2 | -5.89·10-3; -9.13·10-4 | -3.73·10-3; -2.72·10-4 |  |  |
|  | intercept | -5.82 | 2.07·10-1 | -1.53·10; 2.97 | - |  |  |
| P + TPI | P | -3.27·10-3 * | 8.39·10-3 | -5.98·10-3; -1.07·10-3 | -3.85·10-3; -4.52·10-4 | 97.84 | 0.105 |
|  | TPI | 3.25·10-5 | 9.93·10-1 | -7.29·10-3; 7.13·10-3 | -5.35·10-3; 5.11·10-3 |  |  |
|  | intercept | 2.21 * | 3.98·10-2 | 2.51·10-3; 4.53 | - |  |  |
| Tmax + P + TPI | Tmax | 3.21·10-1 | 1.66·10-1 | -1.24·10-1; 7.94·10-1 | -1.13·10-1; 5.50·10-1 | 97.86 | 0.104 |
|  | P | -3.28·10-3 * | 1.07·10-2 | -6.10·10-3; -9.98·10-4 | -3.89·10-3; -3.32·10-4 |  |  |
|  | TPI | 9.73·10-4 | 7.95·10-1 | -6.54·10-3; 8.34·10-3 | -4.95·10-3; 5.87·10-3 |  |  |
|  | intercept | -4.48 | 3.64·10-1 | -1.45·10; 5.07 | - |  |  |
| P | P | -2.98·10-3 * | 1.15·10-2 | -5.56·10-3; -8.86·10-4 | -3.57·10-3; -3.50·10-4 | 98.70 | 0.068 |
|  | intercept | 1.91 ‡ | 6.07·10-2 | 4.28·10-2; 4.09 | - |  |  |
| P + El | P | -2.98·10-3 * | 1.16·10-2 | -5.55·10-3; -8.81·10-4 | -3.59·10-3; -3.51·10-4 | 100.69 | 0.025 |
|  | El | -5.34·10-5 | 9.58·10-1 | -2.09·10-3; 1.92·10-3 | -1.56·10-3; 1.38·10-3 |  |  |
|  | intercept | 1.93 | 6.93·10-2 | -2.38·10-2; 4.18 | - |  |  |
| Tmean + TRI | Tmean | 5.83·10-1 | 1.68·10-1 | -2.07·10-1; 1.47 | -1.93·10-1; 1.02 | 102.80 | 0.009 |
|  | TRI | -7.01·10-3 | 1.96·10-1 | -1.84·10-2; 3.14·10-3 | -1.31·10-2; 2.54·10-3 |  |  |
|  | intercept | -8.63 | 1.71·10-1 | -2.19·10; 3.13 | - |  |  |
| TRI | TRI | -8.78·10-3 | 9.97·10-2 | -2.00·10-2; 1.14·10-3 | -1.40·10-2; 1.14·10-3 | 103.32 | 0.007 |
|  | intercept | 4.74·10-2 | 9.22·10-1 | -8.98·10-1; 1.01 | - |  |  |
| Tmax + Long | Tmax | 4.41·10-1 ‡ | 5.01·10-2 | 1.65·10-2; 9.07·10-1 | -1.06·10-2; 6.25·10-1 | 103.58 | 0.006 |
|  | Long | 8.26·10-6 | 1.53·10-1 | -2.46·10-6; 2.05·10-5 | -2.36·10-6; 1.41·10-5 |  |  |
|  | intercept | -1.01·10 * | 3.35·10-2 | -2.00·10; -1.18 | - |  |  |
| Tmean | Tmean | 7.34·10-1 | 8.20·10-2 | -4.94·10-2; 1.63 | -8.59·10-2; 1.11 | 103.70 | 0.005 |
|  | intercept | -1.15·10 | 6.52·10-2 | -2.46·10; 3.79·10-2 | - |  |  |
| Tmax | Tmax | 3.84·10-1 | 7.79·10-2 | -2.97·10-2; 8.31·10-1 | -3.87·10-2; 5.76·10-1 | 103.82 | 0.005 |
|  | intercept | -8.71 ‡ | 5.67·10-2 | -1.81·10; -6.46·10-2 | - |  |  |
| Tmean + TPI | Tmean | 6.84·10-1 | 1.07·10-1 | -1.04·10-1; 1.58 | -1.23·10-1; 1.09 | 104.340 | 0.004 |
|  | TPI | 1.72·10-3 | 6.15·10-1 | -5.09·10-3; 8.52·10-3 | -3.83·10-3; 6.07·10-3 |  |  |
|  | intercept | -1.07·10 | 8.71·10-2 | -2.39·10; 8.74·10-1 | - |  |  |
| Tmax + TPI | Tmax | 3.68·10-1 | 1.05·10-1 | -6.53·10-2; 8.33·10-1 | -5.70·10-2; 5.89·10-1 | 104.44 | 0.004 |
|  | TPI | 2.59·10-3 | 4.59·10-1 | -4.34·10-3; 9.59·10-3 | -3.31·10-3; 6.81·10-3 |  |  |
|  | intercept | -8.36 | 7.96·10-2 | -1.81·10; 7.12·10-1 | - |  |  |
| Tmean + Sl | Tmean | 6.60·10-1 | 1.24·10-1 | -1.39·10-1; 1.57 | -1.48·10-1; 1.08 | 104.53 | 0.004 |
|  | Sl | -1.02·10-2 | 8.00·10-1 | -9.31·10-2; 6.71·10-2 | -6.80·10-2; 4.92·10-2 |  |  |
|  | intercept | -1.03·10 | 1.09·10-1 | -2.38·10; 1.62 | - |  |  |
| Sl | Sl | -2.68·10-2 | 4.94·10-1 | -1.08·10-1; 4.77·10-2 | -7.84·10-2; 3.50·10-2 | 105.82 | 0.002 |
|  | intercept | -4.49·10-1 | 2.62·10-1 | -1.25; 3.33·10-1 | - |  |  |
| null | intercept | -7.12·10-1 * | 2.46·10-3 | -1.19; -2.61·10-1 | - | 105.92 | 0.002 |
| TPI | TPI | 1.28·10-3 | 7.01·10-1 | -5.37·10-3; 7.86·10-3 | -3.98·10-3; 5.60·10-3 | 106.15 | 0.002 |
|  | intercept | -6.79·10-1 * | 4.19·10-3 | -1.16; -2.24·10-1 | - |  |  |
| Long | Long | 5.41·10-6 | 2.98·10-1 | -4.43·10-6; 1.62·10-5 | -3.43·10-6; 1.14·10-5 | 106.79 | 0.001 |
|  | intercept | -8.61·10-1 | 2.36·10-3 | -1.45; -3.31·10-1 | - |  |  |
| Tmin + Sl | Tmin | 1.17·10-1 | 6.42·10-1 | -3.67·10-1; 6.31·10-1 | -2.75·10-1; 4.47·10-1 | 106.90 | 0.001 |
|  | Sl | -2.62·10-2 | 5.10·10-1 | -1.09·10-1; 4.97·10-2 | -8.01·10-2; 3.62·10-2 |  |  |
|  | intercept | -1.42 | 4.99·10-1 | -5.76; 2.61 | - |  |  |
| Tmin | Tmin | 4.34·10-2 | 8.58·10-1 | -4.26·10-1; 5.36·10-1 | -3.14·10-1; 3.78·10-1 | 107.08 | 0.001 |
|  | intercept | -1.06 | 6.08·10-1 | -5.30; 2.91 | - |  |  |
| Tmin + TPI | Tmin | 6.79·10-2 | 7.88·10-1 | -4.19·10-1; 5.77·10-1 | -3.11·10-1; 4.10·10-1 | 107.13 | 0.001 |
|  | TPI | 1.58·10-3 | 6.45·10-1 | -5.22·10-3; 8.38·10-3 | -3.89·10-3; 6.02·10-3 |  |  |
|  | intercept | -1.23 | 5.64·10-1 | -5.59; 2.87 | - |  |  |
| Lat | Lat | -7.63·10-7 | 6.65·10-1 | -4.33·10-6; 2.65·10-6 | -3.10·10-6; 1.96·10-6 | 107.73 | 0.001 |
|  | intercept | 2.48 | 7.37·10-1 | -1.19·10; 1.74·10 | - |  |  |
| El | El | -2.37·10-4 | 8.08·10-1 | -2.21·10-3; 1.65·10-3 | -1.62·10-3; 1.19·10-3 | 107.86 | 0.001 |
|  | intercept | -6.34·10-1 | 1.07·10-1 | -1.43; 1.24·10-1 | - |  |  |
| Tmin + El | Tmin | 5.21·10-2 | 8.32·10-1 | -4.22·10-1; 5.53·10-1 | -3.16·10-1; 3.92·10-1 | 109.02 | 0.000 |
|  | El | -2.42·10-4 | 8.05·10-1 | -2.24·10-3; 1.65·10-3 | -1.64·10-3; 1.21·10-3 |  |  |
|  | intercept | -1.06 | 6.10·10-1 | -5.30; 2.92 | - |  |  |
| Bld | Bld | -9.31·10-3 ‡ | 7.79·10-2 | -2.10·10-2; -3.60·10-4 | -1.41·10-2; 1.47·10-3 | - | - |
|  | intercept | 1.52 | 2.41·10-1 | -8.14·10-1; 4.27 | - |  |  |
