# Supplementary material
Source: MDPI journal article supplement (https://www.mdpi.com/1999-4907/8/8/293)

**(a)**

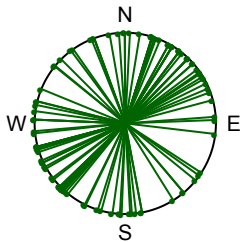

**(b)**

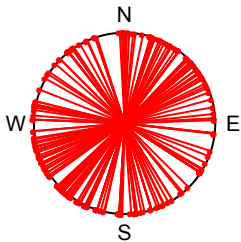

**(c)**

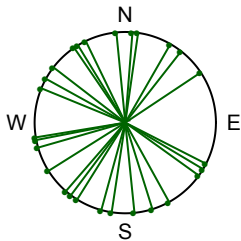

**(d)**

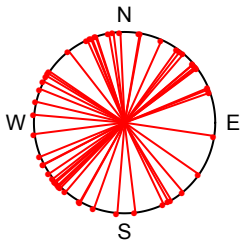

Supplement: s1 [file s1]

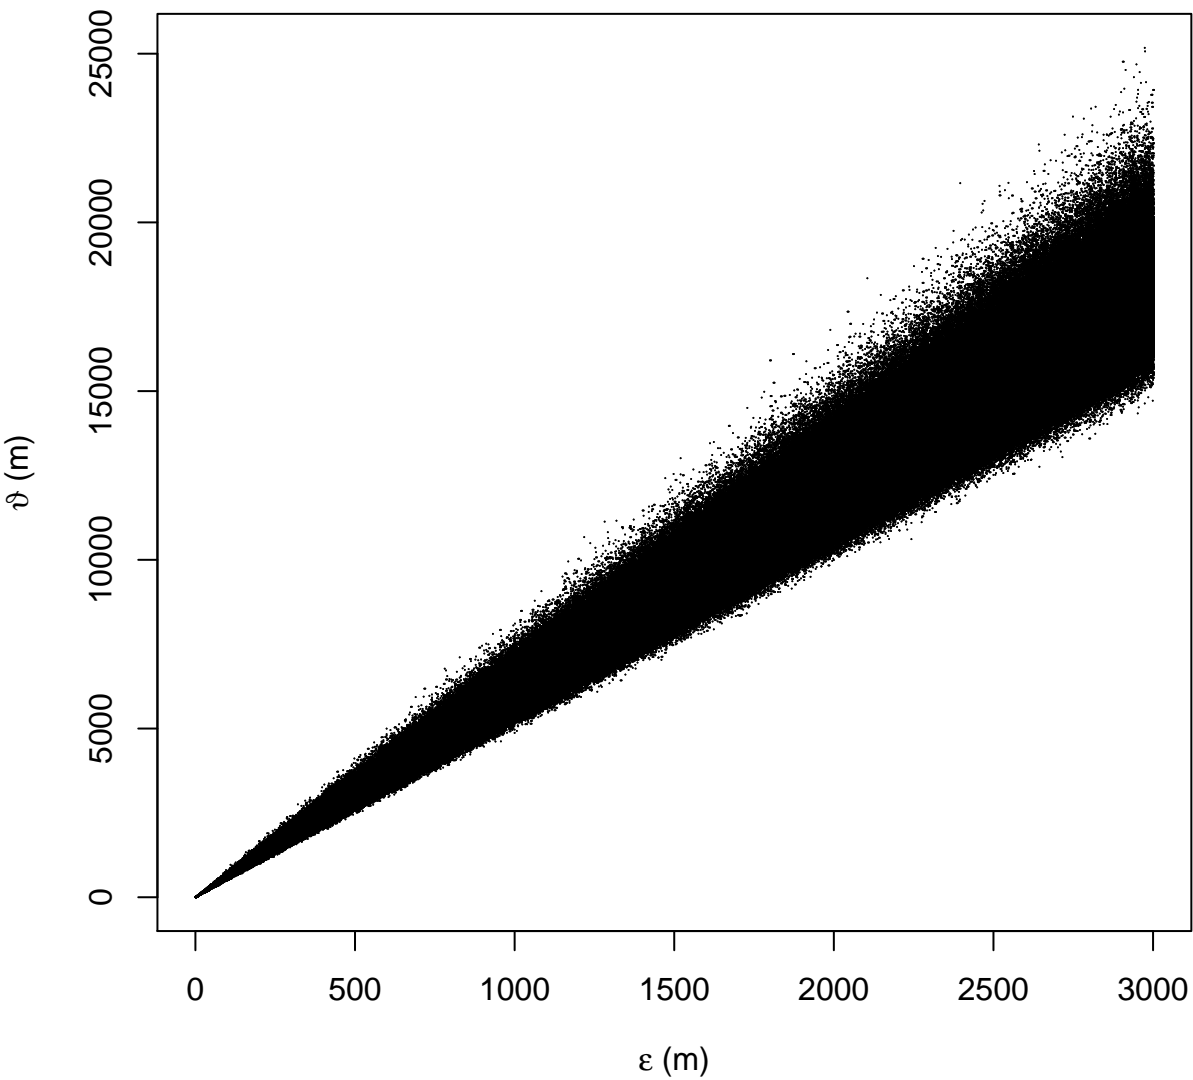

Supplement: s1 [file s1]
